# Supplementary material for: Transitional dispersive scenarios driven by mesoscale flows on complex terrain under strong dry convective conditions
Source: Copernicus journal article supplement (doi:10.5194/acp-9-119-2009), 2009-01-08

**DAY 25/07/95**

**01:00 UTC**

LPDM SIMULTIONS

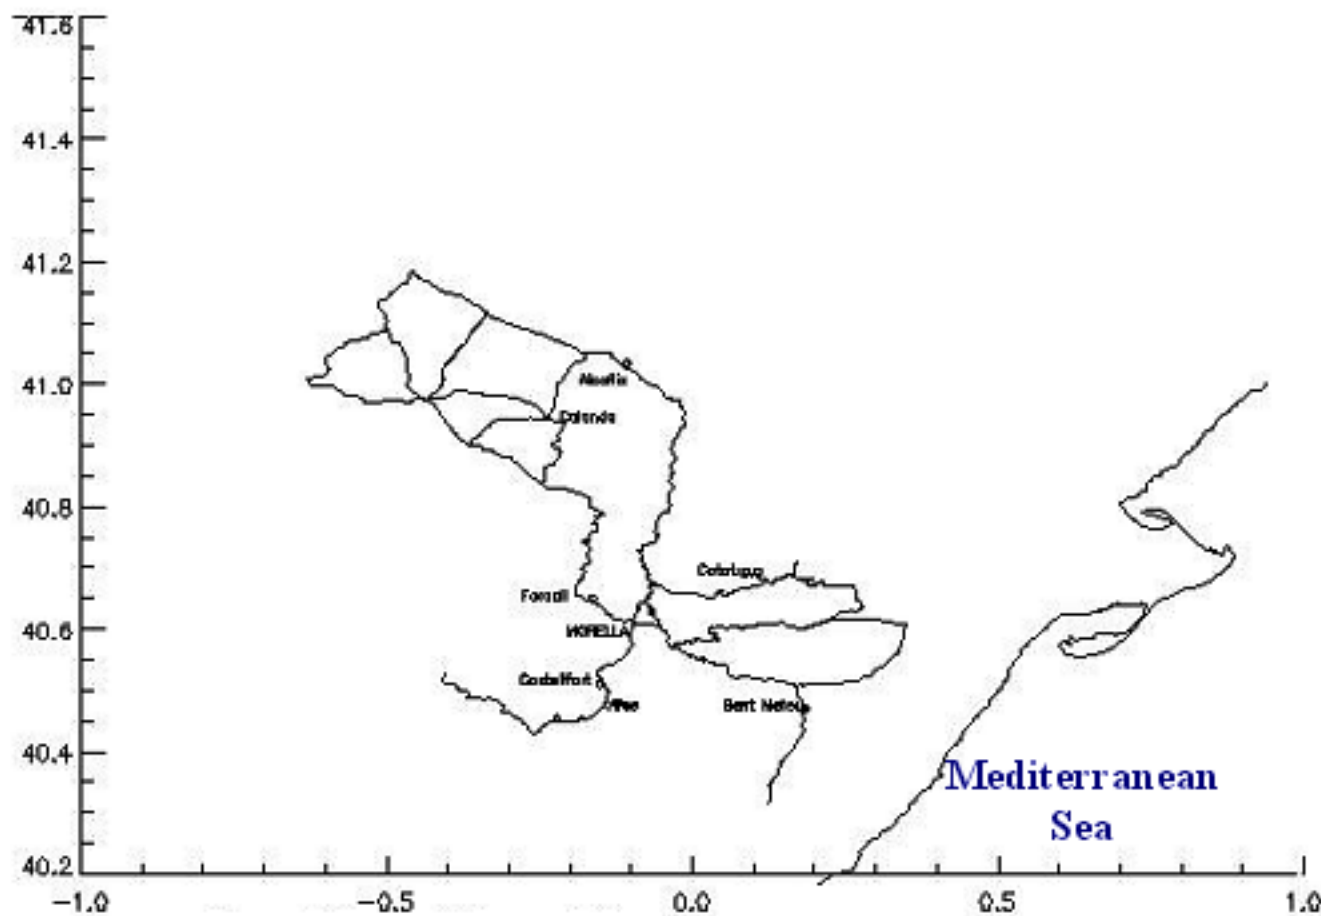

- Particles between 0 and 2 h since emission
- Particles between 2 and 4 h since emission
- Particles between 4 and 6 h since emission

**DAY 25/07/95**

**02:00 UTC**

LPDM SIMULTIONS

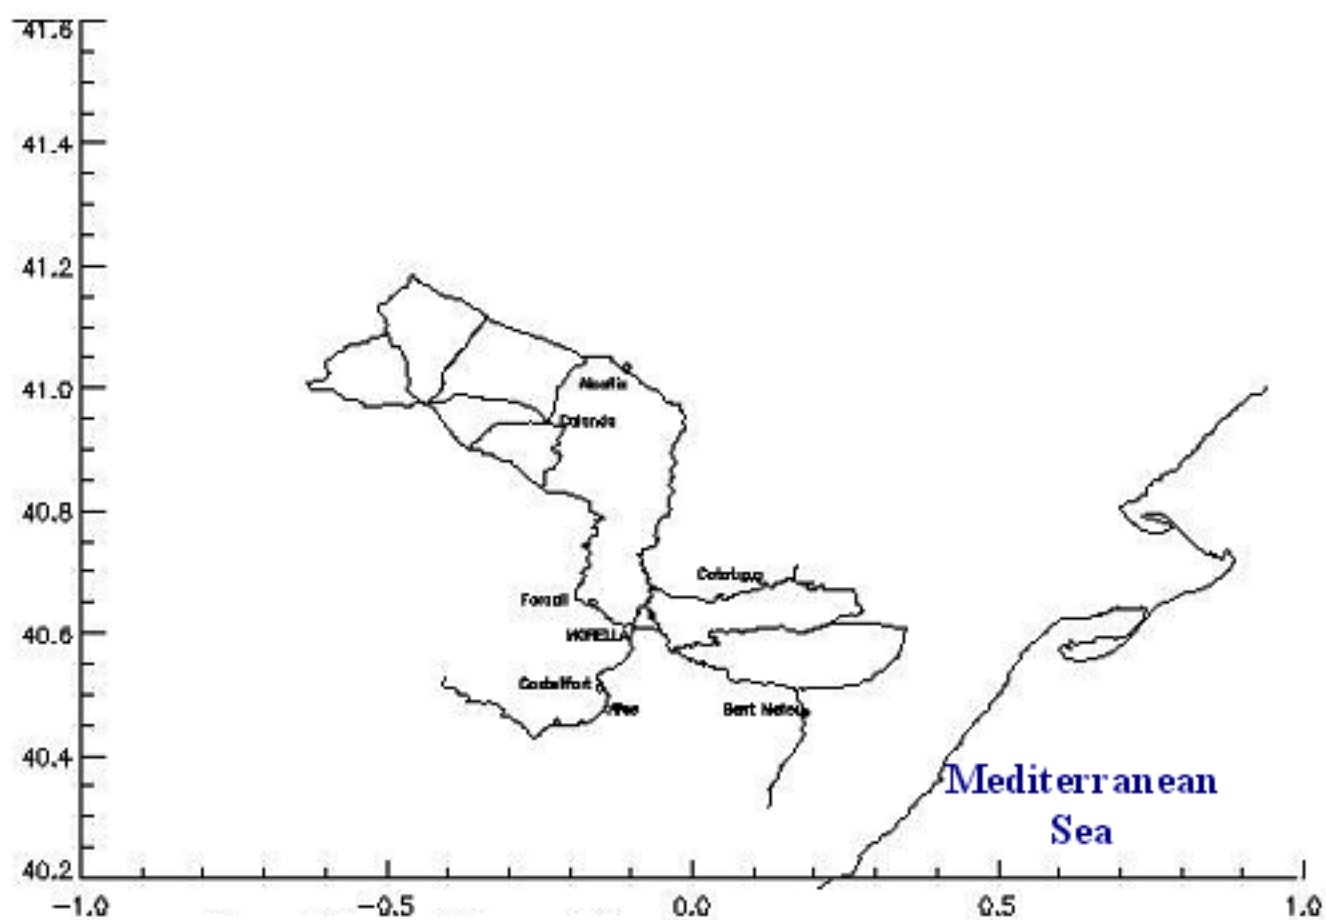

- Particles between 0 and 2 h since emission
- Particles between 2 and 4 h since emission
- Particles between 4 and 6 h since emission

**DAY 25/07/95**

**03:00 UTC**

LPDM SIMULTIONS

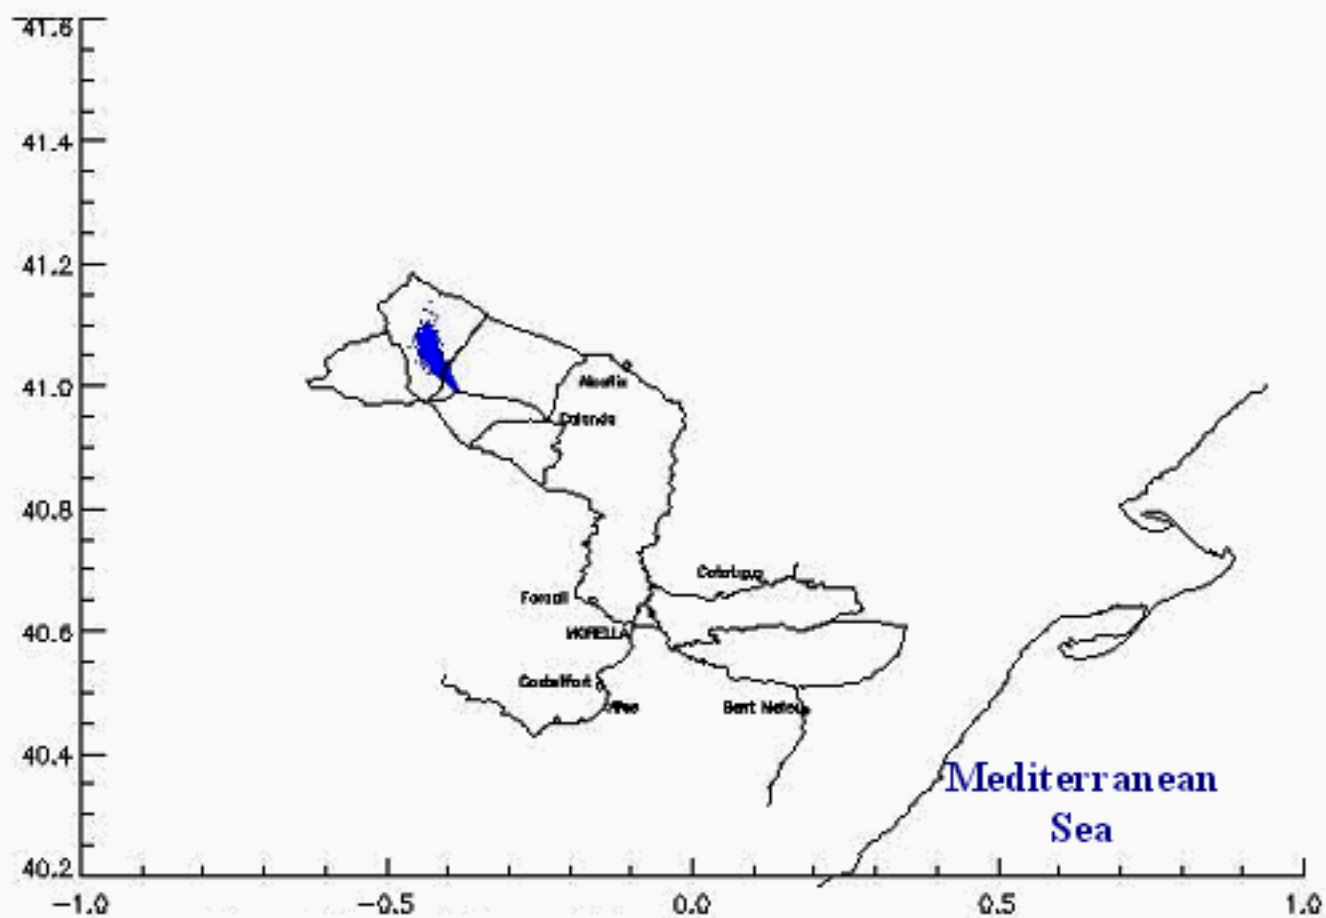

- Particles between 0 and 2 h since emission
- Particles between 2 and 4 h since emission
- Particles between 4 and 6 h since emission

**DAY 25/07/95**

**04:00 UTC**

LPDM SIMULTIONS

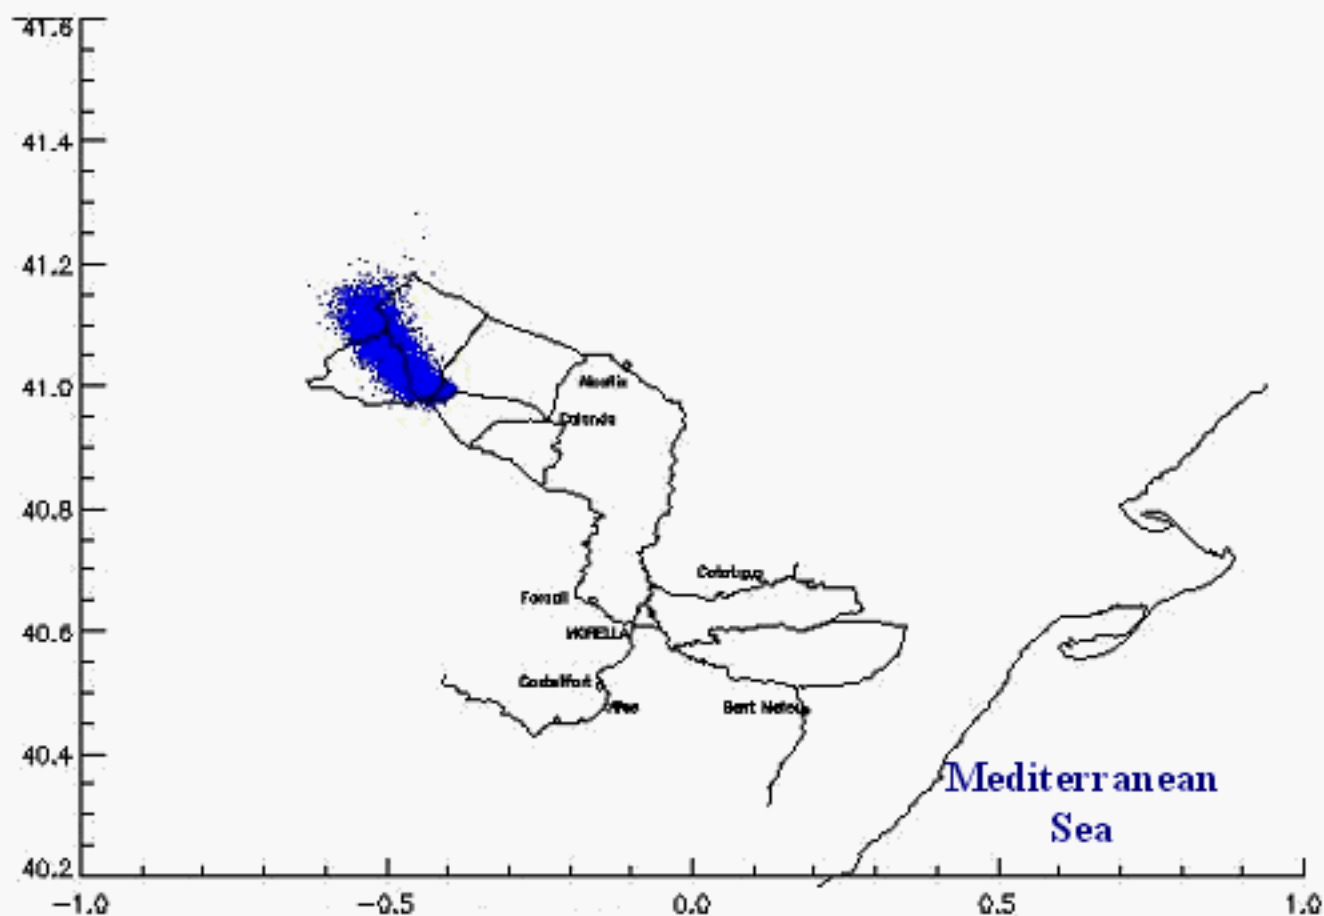

**DAY 25/07/95**

**05:00 UTC**

LPDM SIMULTIONS

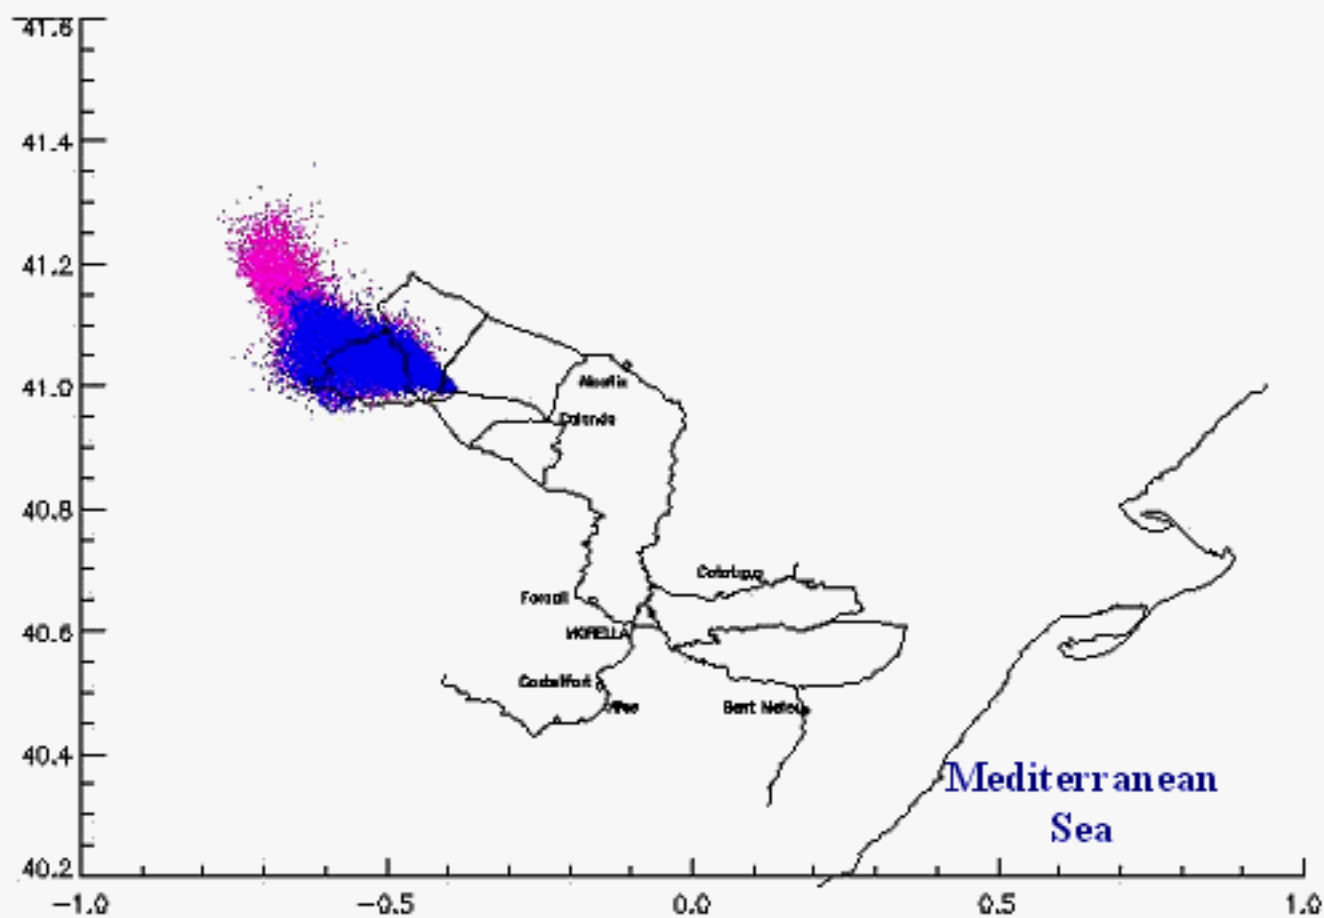

- Particles between 0 and 2 h since emission
- Particles between 2 and 4 h since emission
- Particles between 4 and 6 h since emission

**DAY 25/07/95**

**06:00 UTC**

LPDM SIMULTIONS

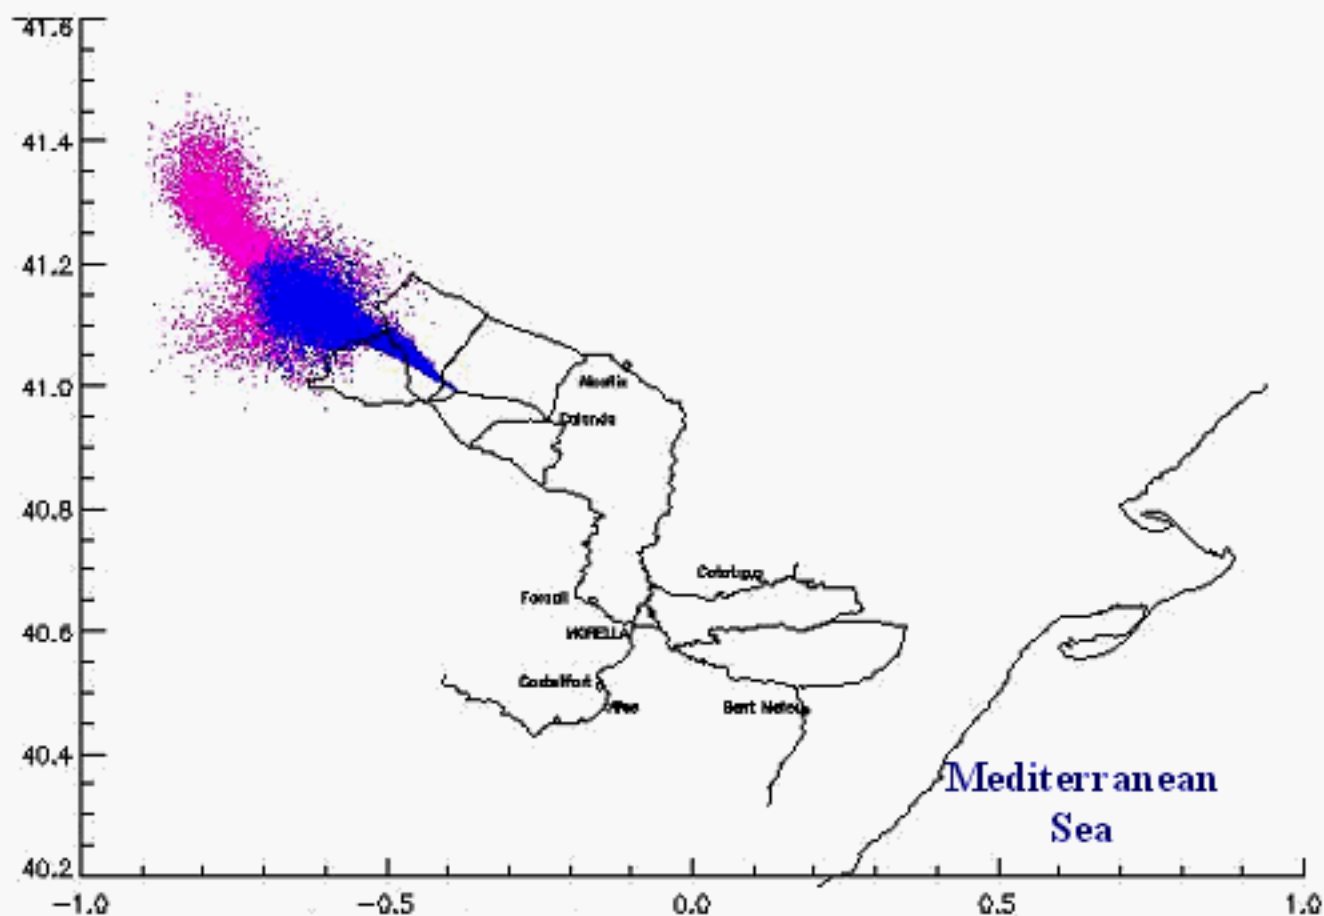

- Particles between 0 and 2 h since emission
- Particles between 2 and 4 h since emission
- Particles between 4 and 6 h since emission

**DAY 25/07/95**

**07:00 UTC**

LPDM SIMULTIONS

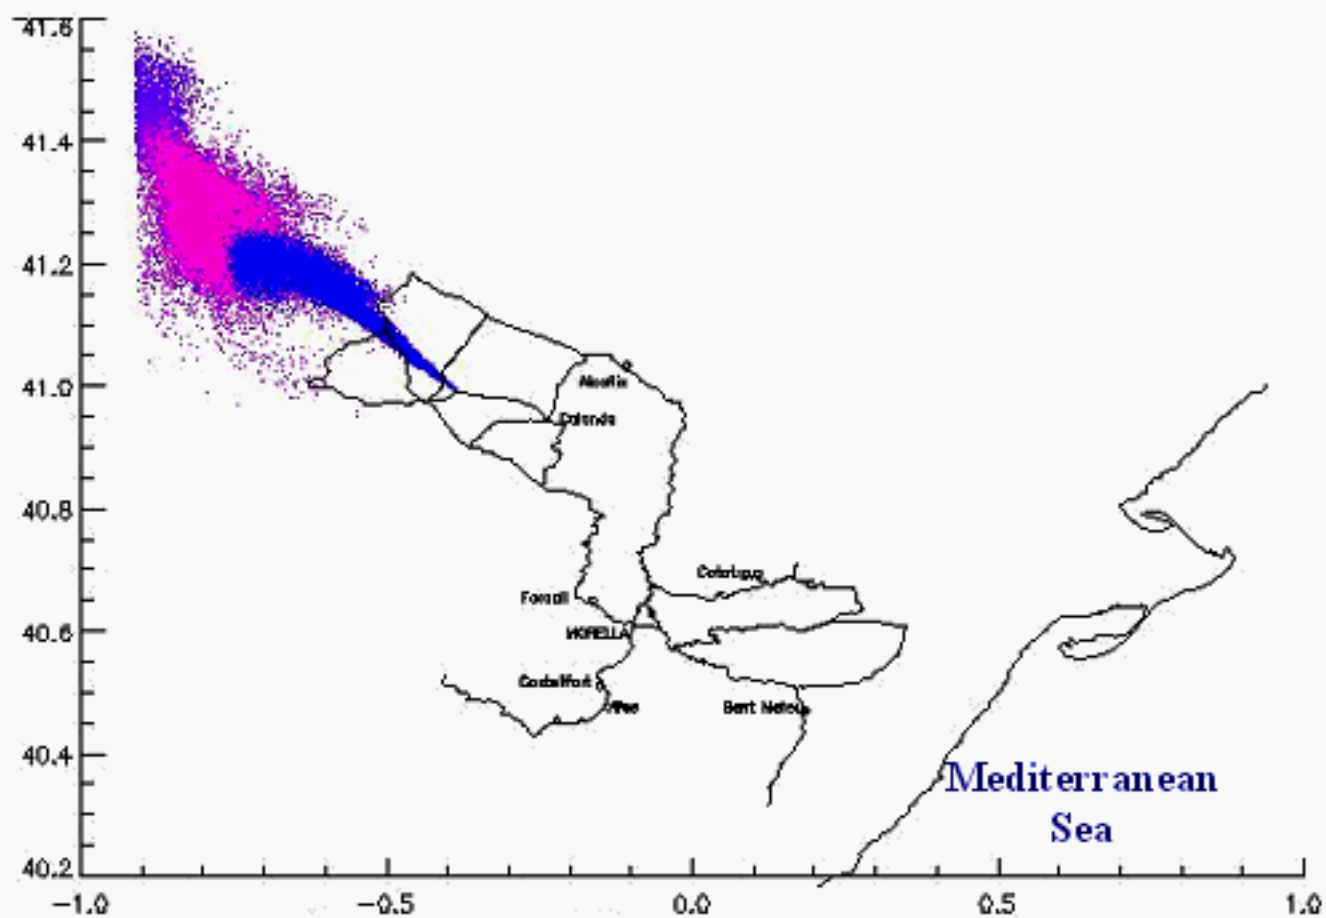

- Particles between 0 and 2 h since emission
- Particles between 2 and 4 h since emission
- Particles between 4 and 6 h since emission

**DAY 25/07/95**

**08:00 UTC**

LPDM SIMULTIONS

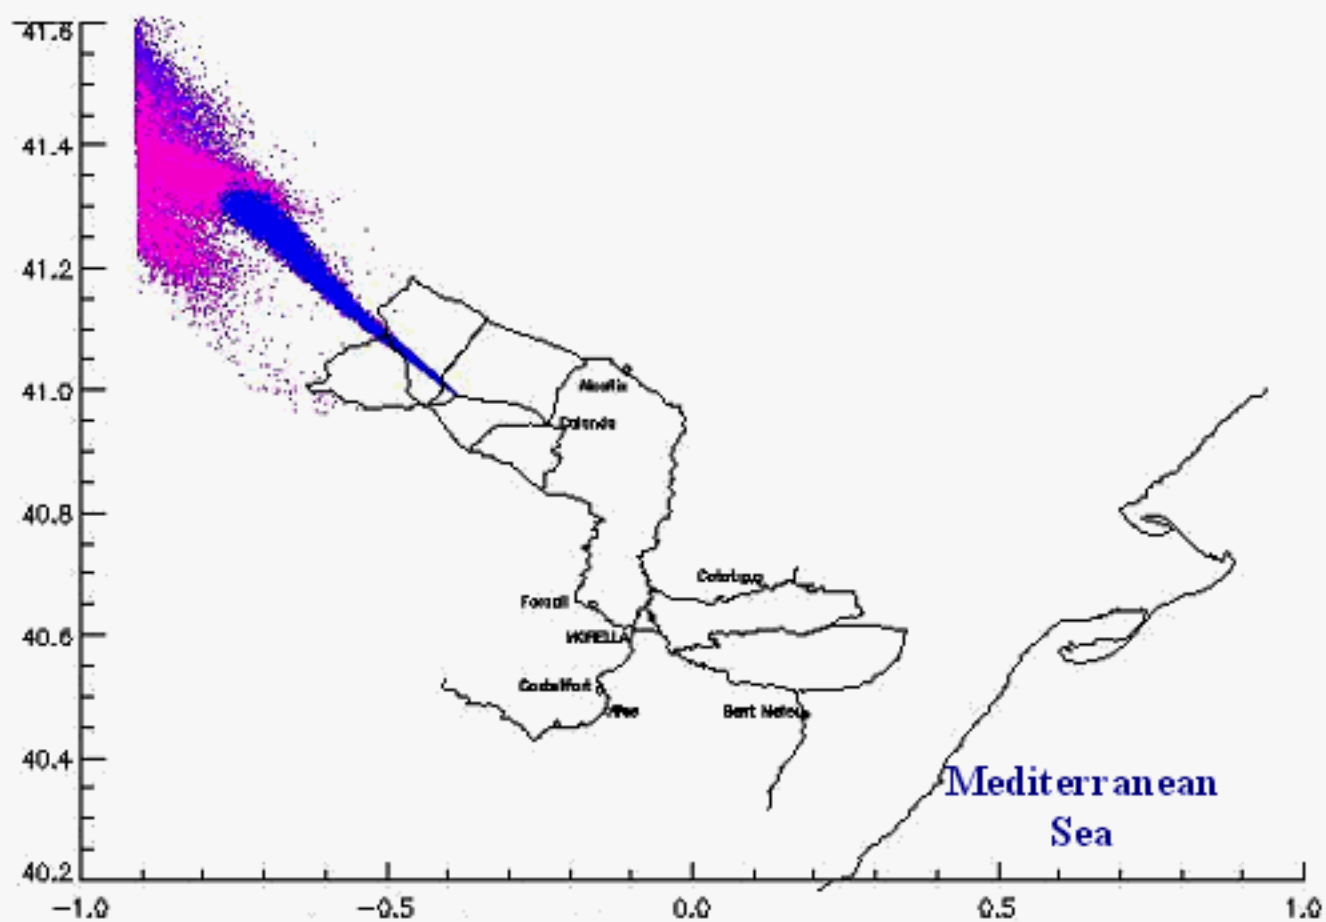

- Particles between 0 and 2 h since emission
- Particles between 2 and 4 h since emission
- Particles between 4 and 6 h since emission



**DAY 25/07/95**

**09:00 UTC**

LPDM SIMULTIONS

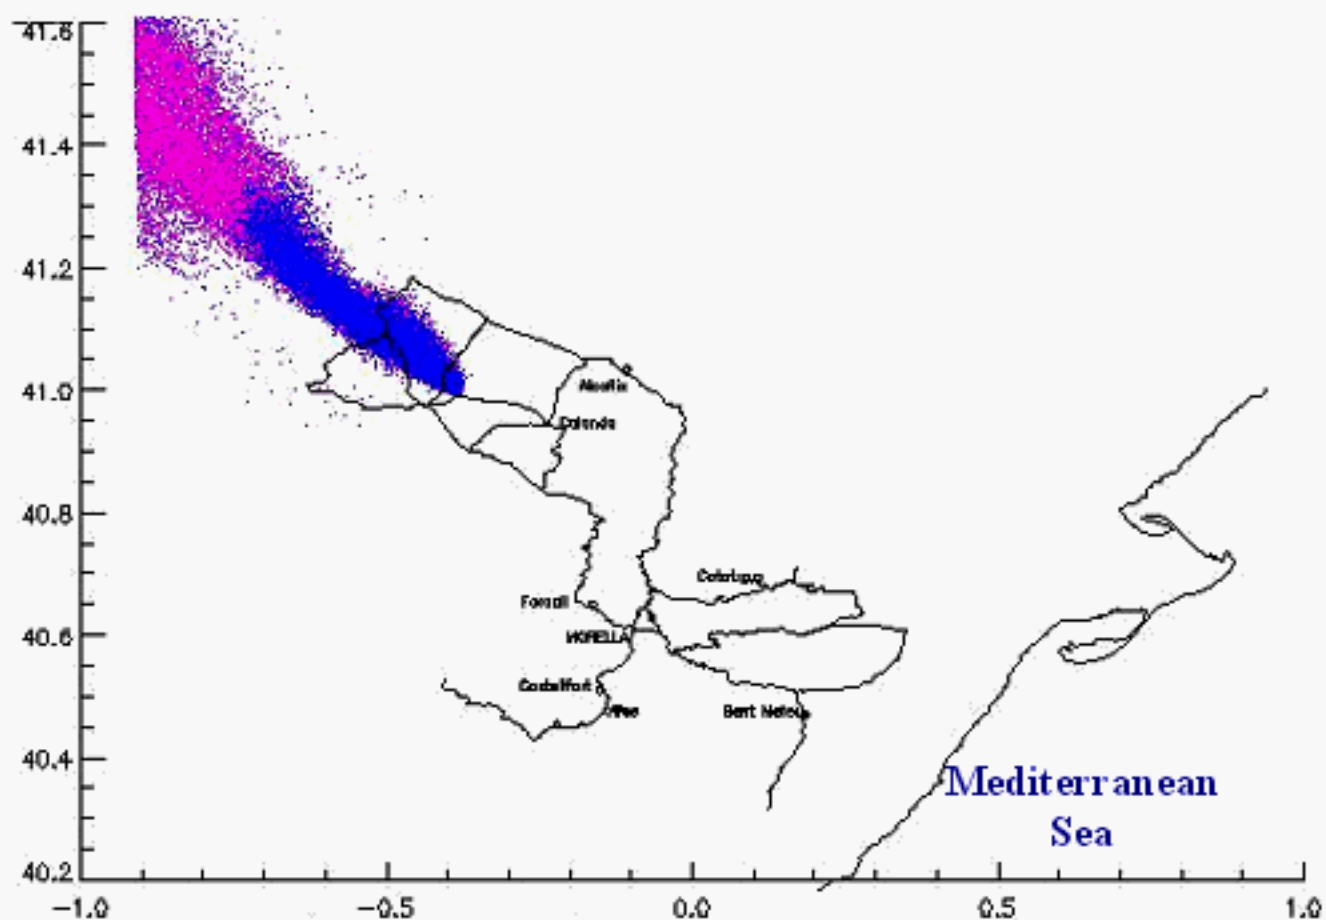

- Particles between 0 and 2 h since emission
- Particles between 2 and 4 h since emission
- Particles between 4 and 6 h since emission

**DAY 25/07/95**

**10:00 UTC**

LPDM SIMULTIONS

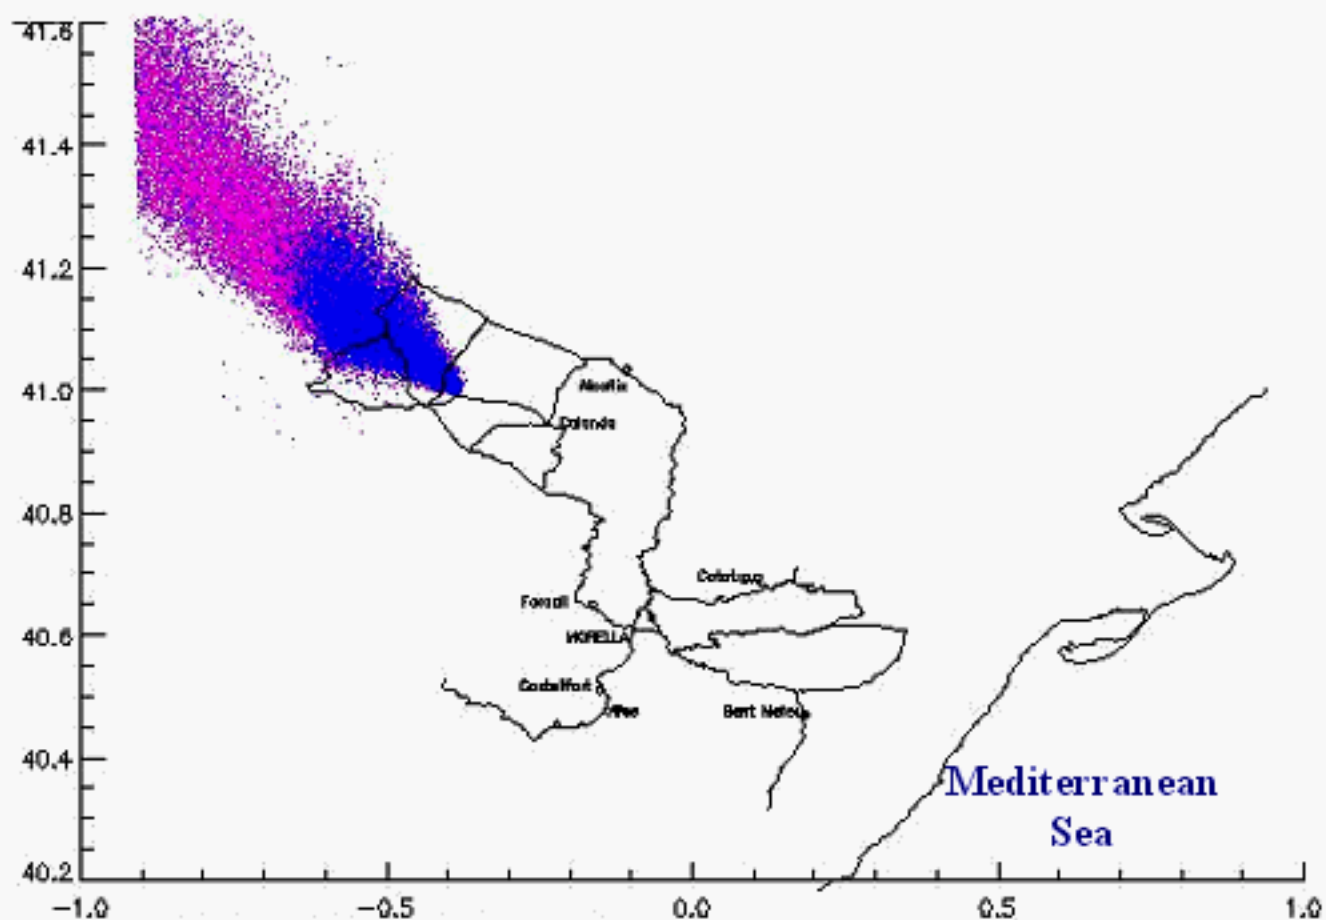

- Particles between 0 and 2 h since emission
- Particles between 2 and 4 h since emission
- Particles between 4 and 6 h since emission

**DAY 25/07/95**

**11:00 UTC**

LPDM SIMULTIONS

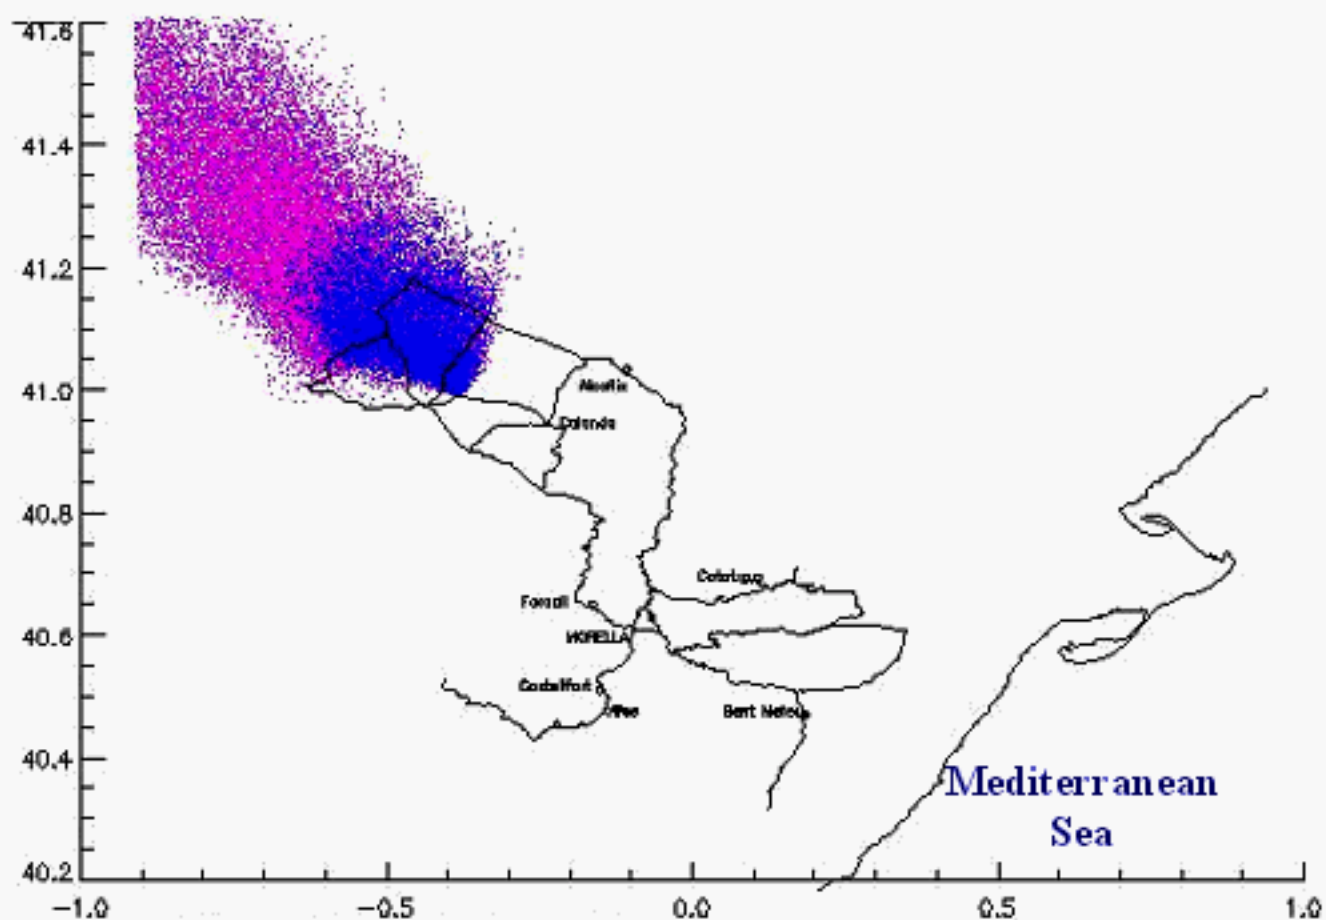

- Particles between 0 and 2 h since emission
- Particles between 2 and 4 h since emission
- Particles between 4 and 6 h since emission

**DAY 25/07/95**

**12:00 UTC**

LPDM SIMULTIONS

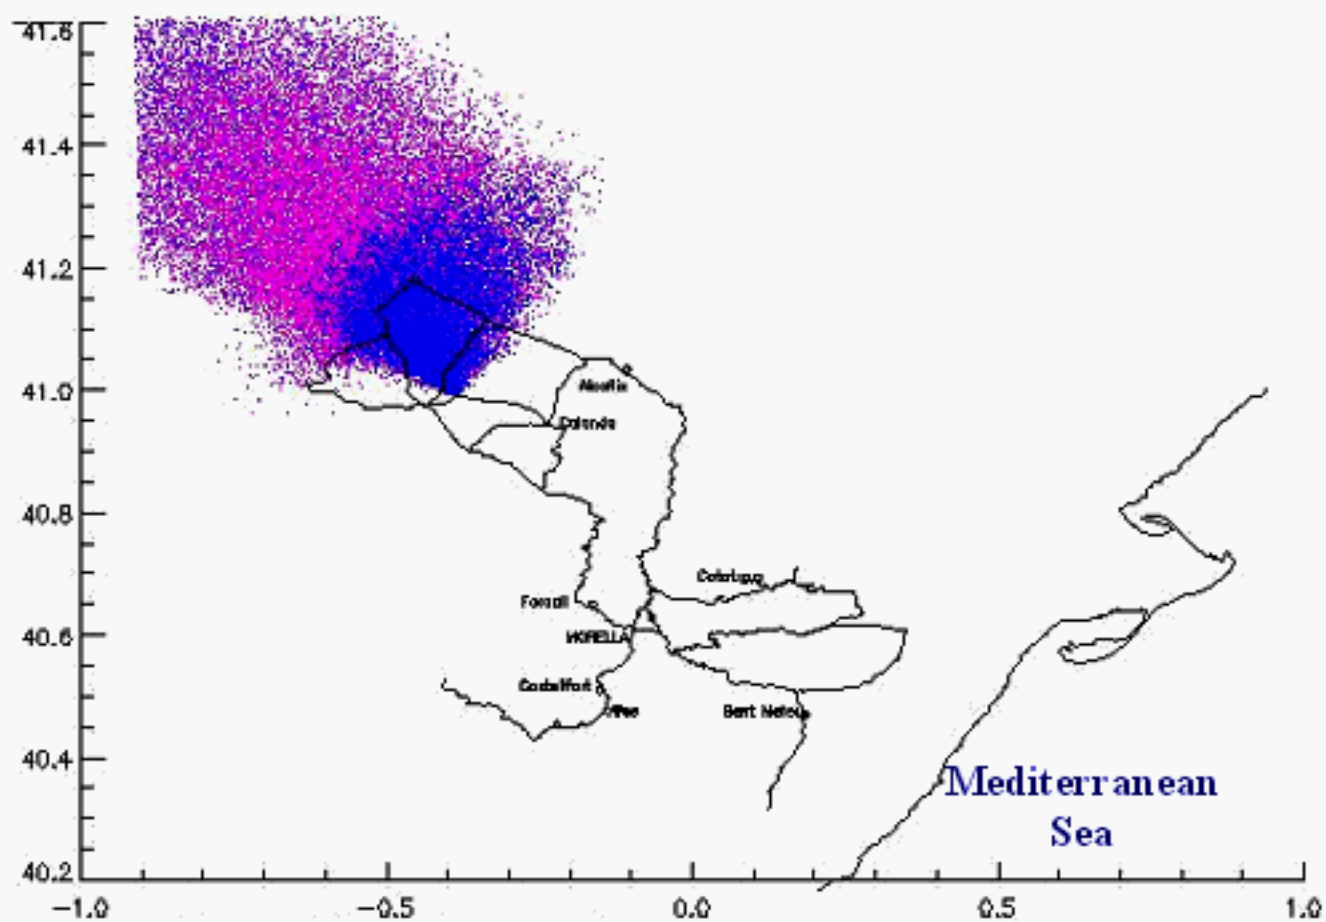

- Particles between 0 and 2 h since emission
- Particles between 2 and 4 h since emission
- Particles between 4 and 6 h since emission

**DAY 25/07/95**

**13:00 UTC**

LPDM SIMULTIONS

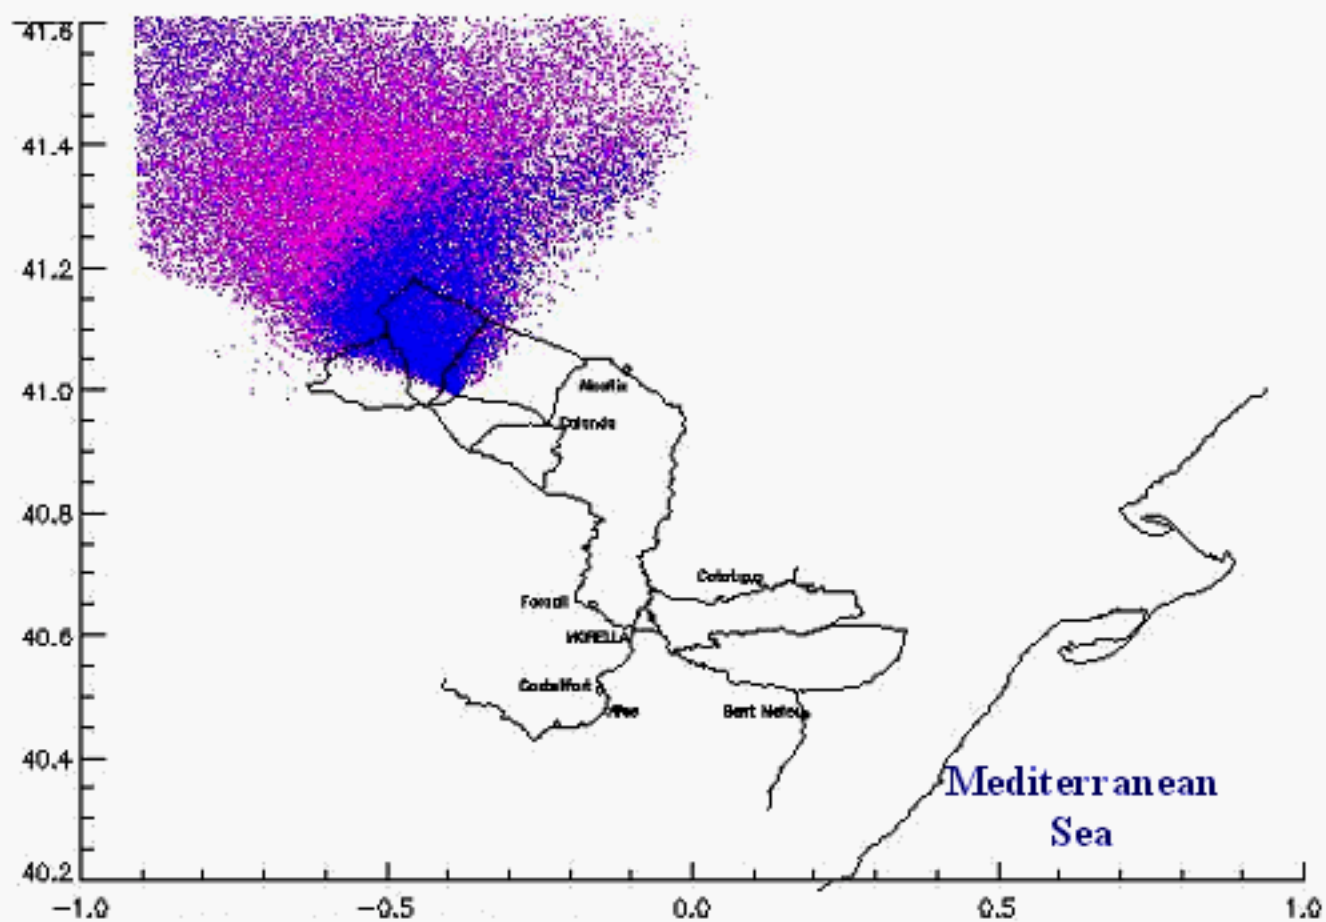

- Particles between 0 and 2 h since emission
- Particles between 2 and 4 h since emission
- Particles between 4 and 6 h since emission

**DAY 25/07/95**

**14:00 UTC**

LPDM SIMULTIONS

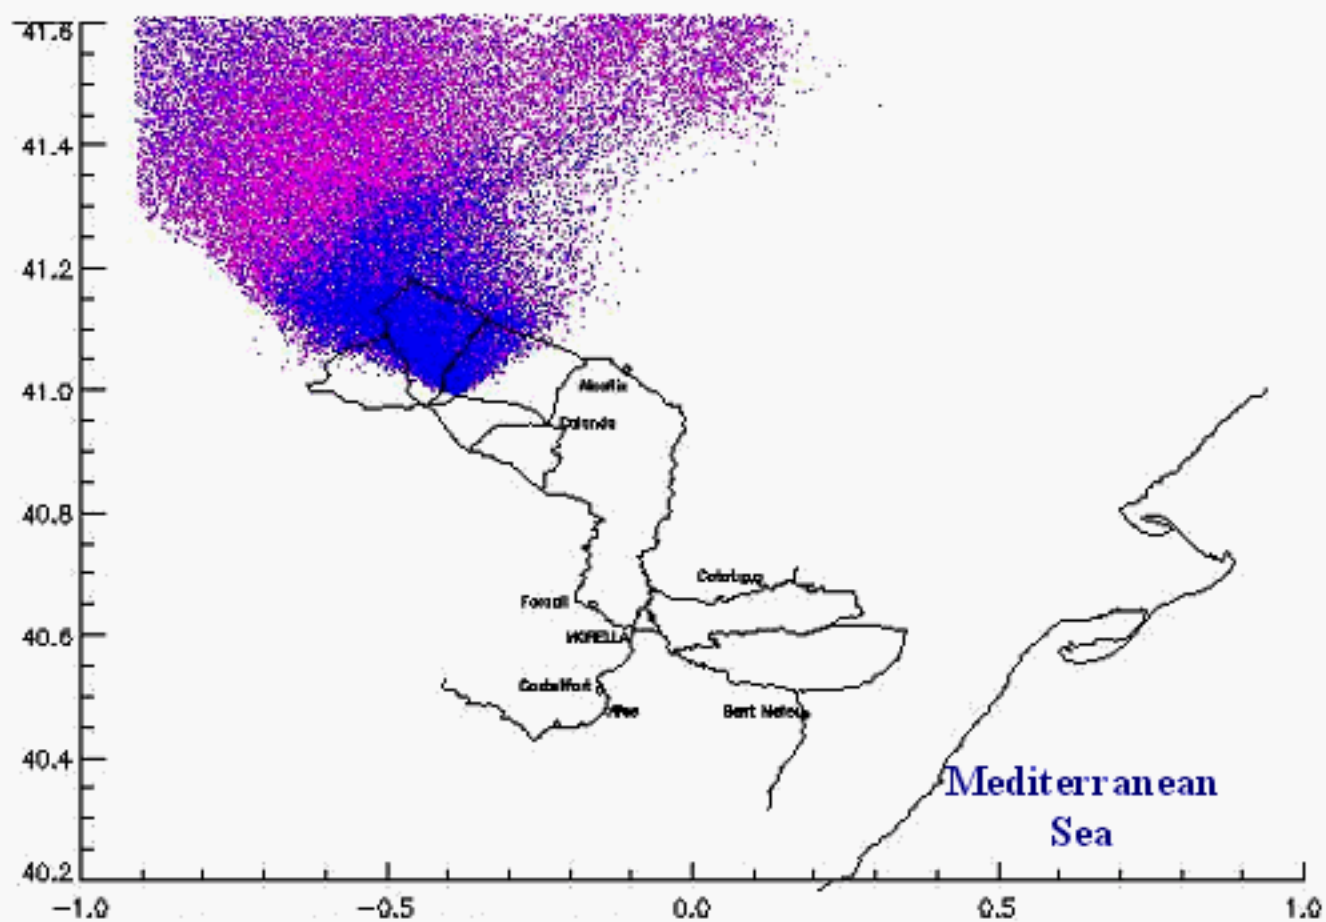

- Particles between 0 and 2 h since emission
- Particles between 2 and 4 h since emission
- Particles between 4 and 6 h since emission



**DAY 25/07/95**

**15:00 UTC**

**LPDM SIMULTIONS**

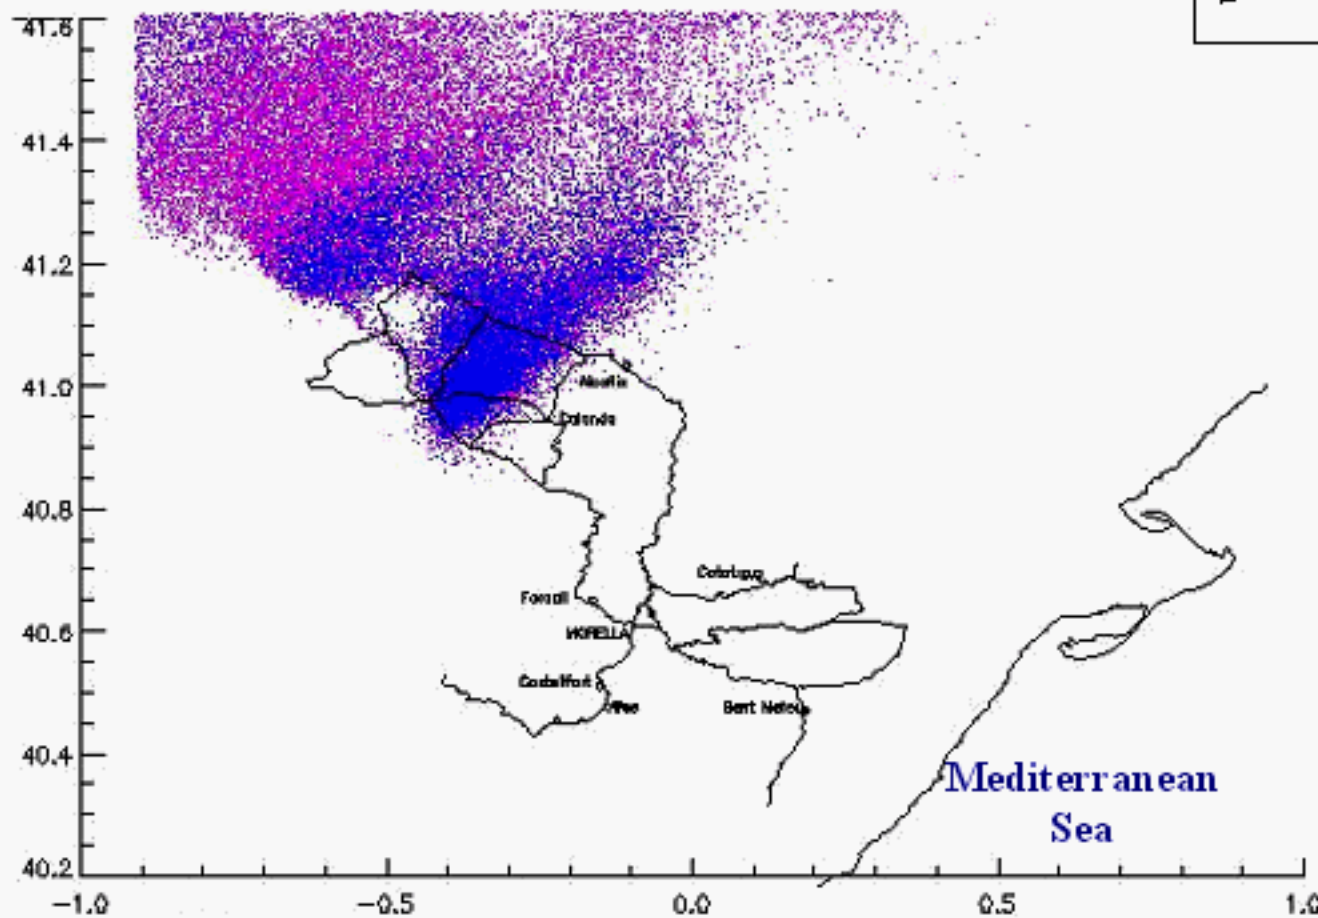

**SIMULTANEOUS MEASUREMENTS**

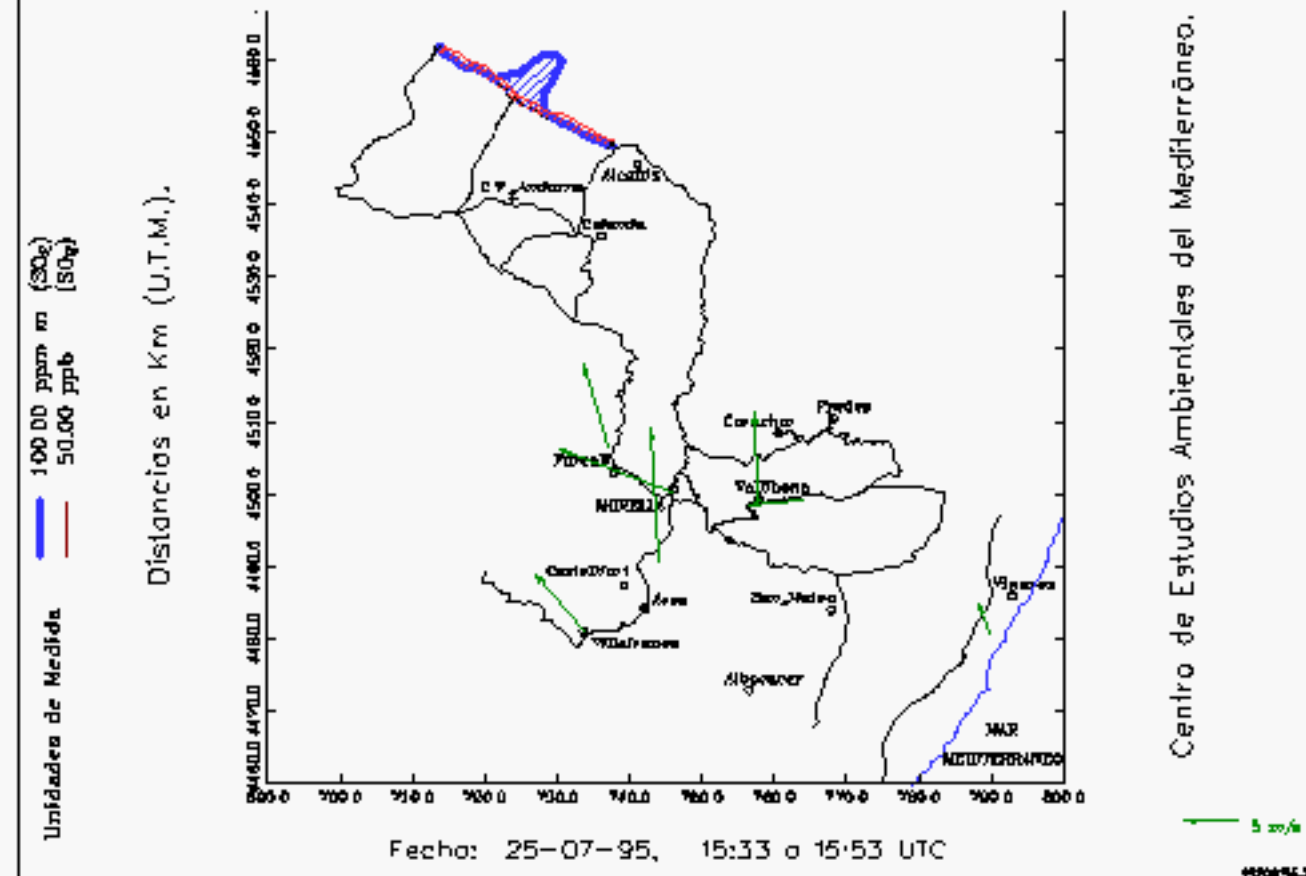

- **Concentration aloft**
- **Ground-level Concentration**
- ➔ **10 m.a.g.l. Wind Vector**

- **Particles between 0 and 2 h since emission**
- **Particles between 2 and 4 h since emission**
- **Particles between 4 and 6 h since emission**

**DAY 25/07/95**

**16:00 UTC**

**LPDM SIMULTIONS**

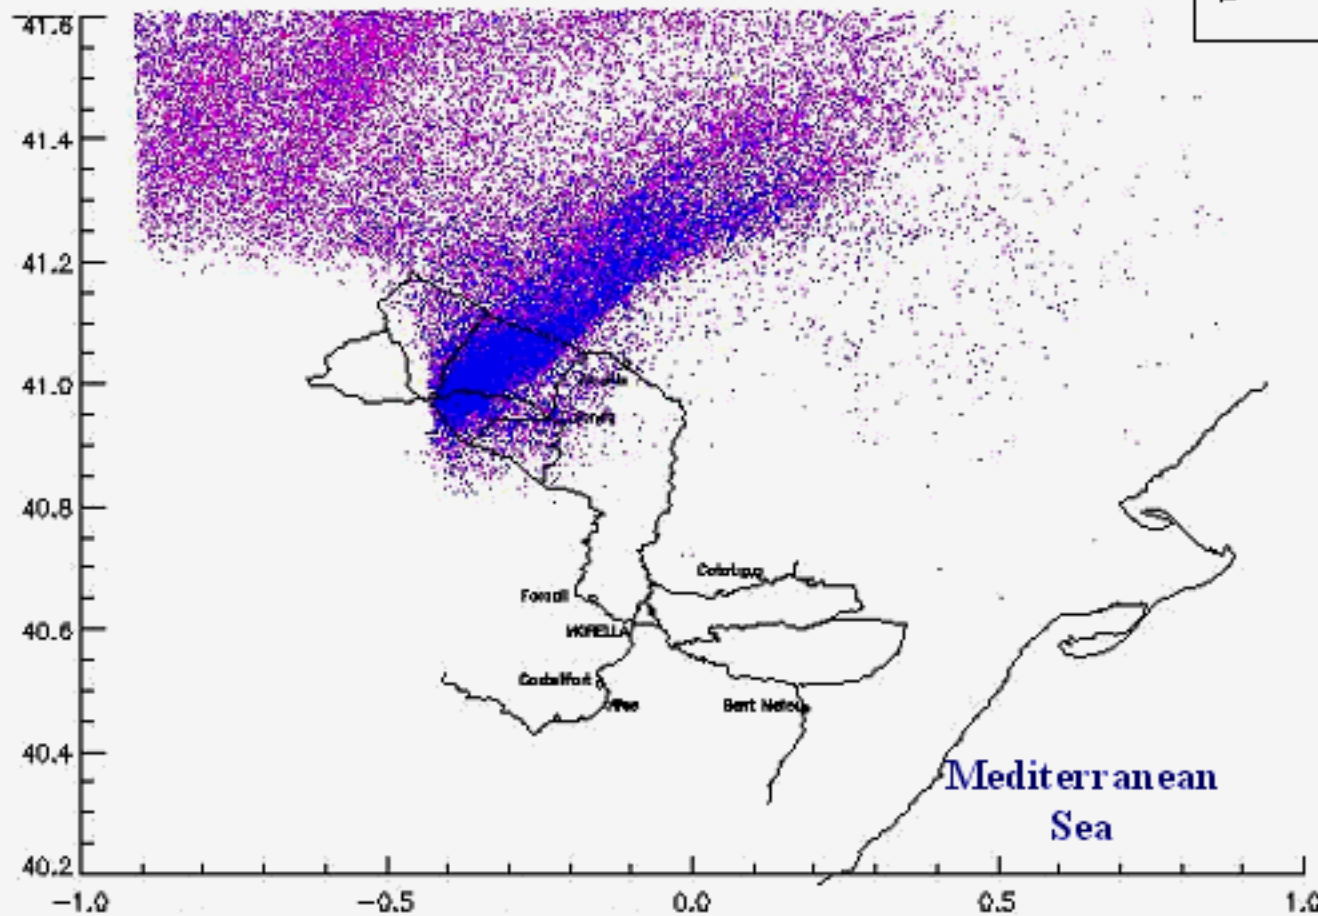

**SIMULTANEOUS MEASUREMENTS**

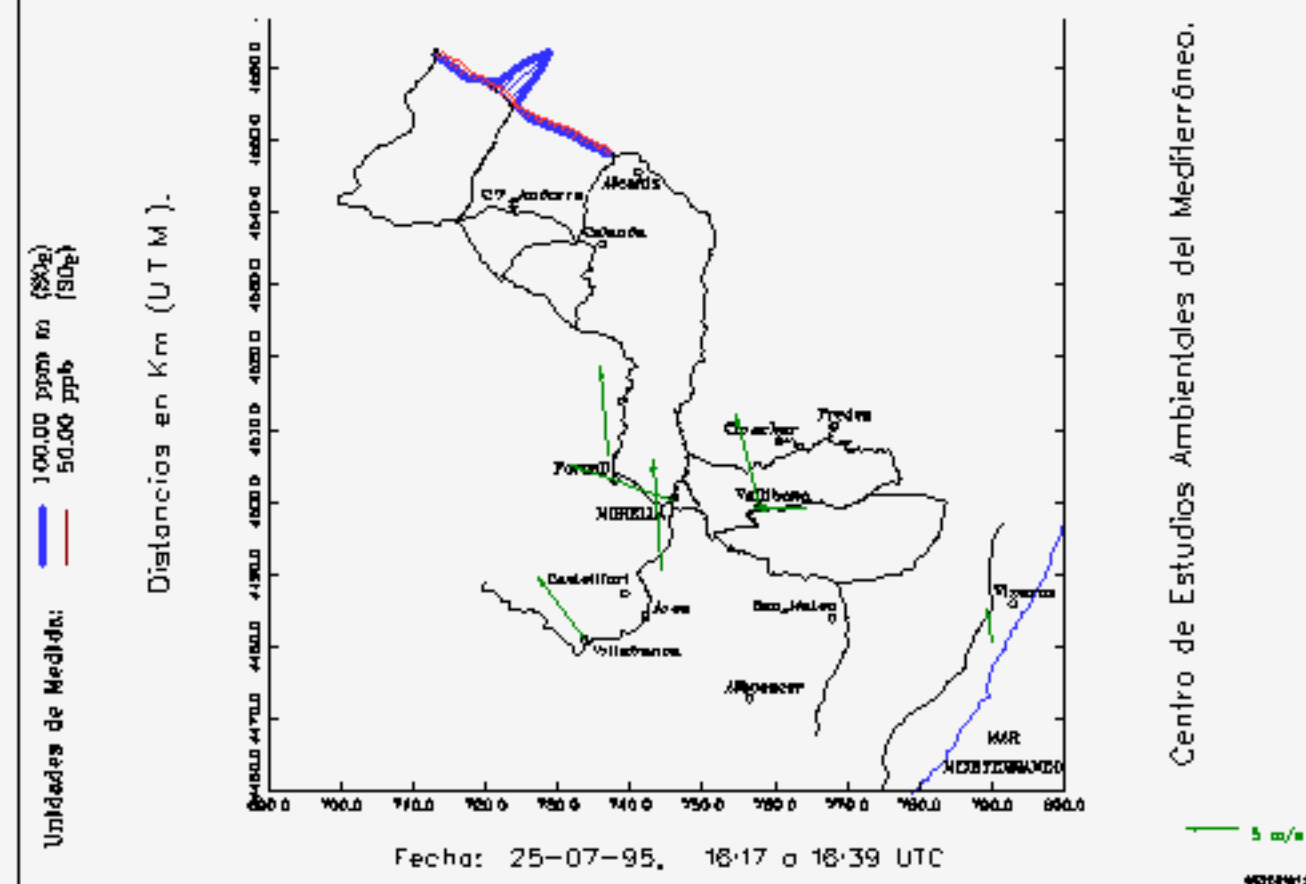

- **Concentration aloft**
- **Ground-level Concentration**
- ➔ **10 m.a.g.l. Wind Vector**

- **Particles between 0 and 2 h since emission**
- **Particles between 2 and 4 h since emission**
- **Particles between 4 and 6 h since emission**



**DAY 25/07/95**

**17:00 UTC**

**LPDM SIMULTIONS**

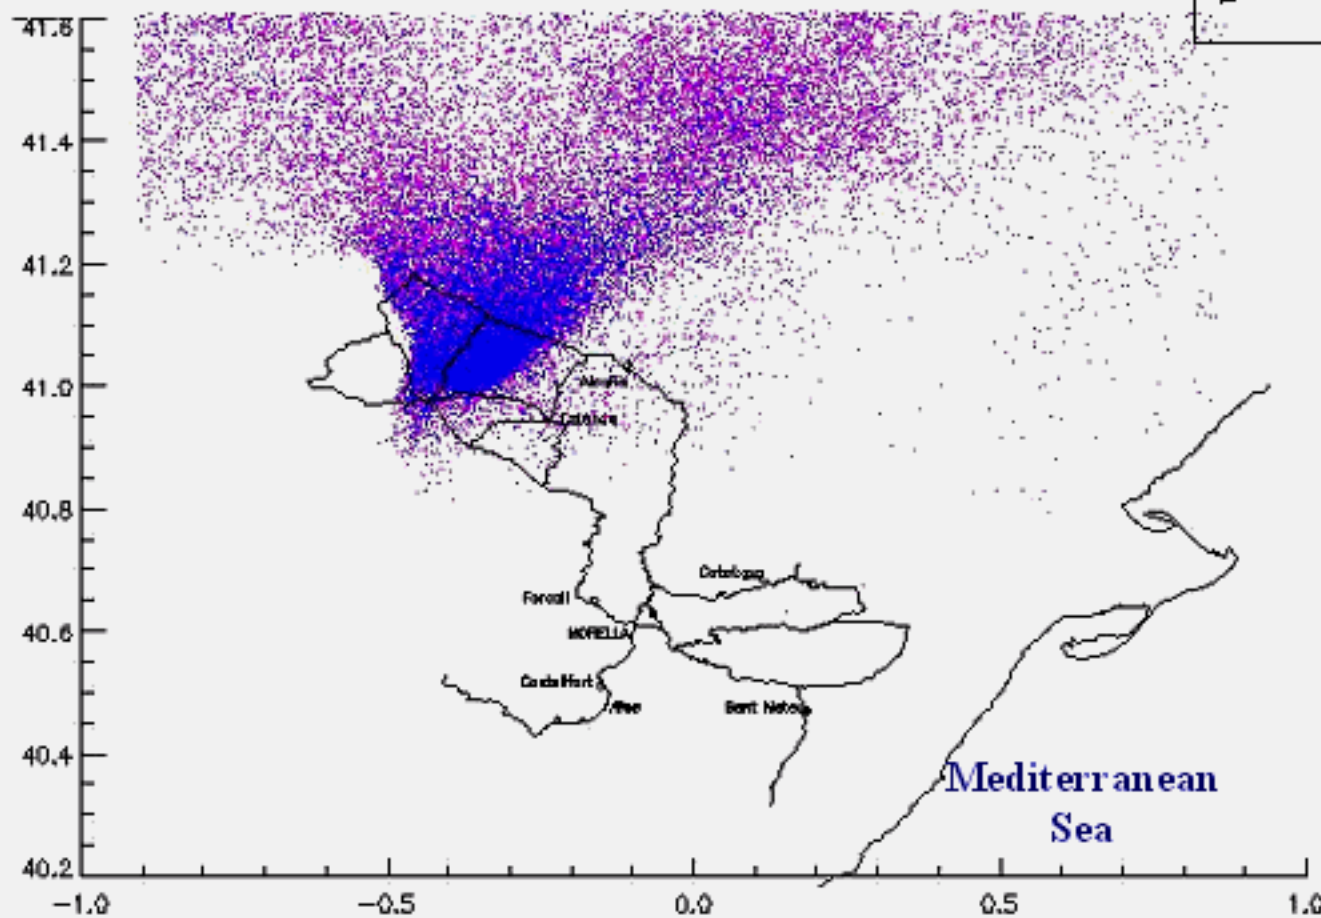

**SIMULTANEOUS MEASUREMENTS**

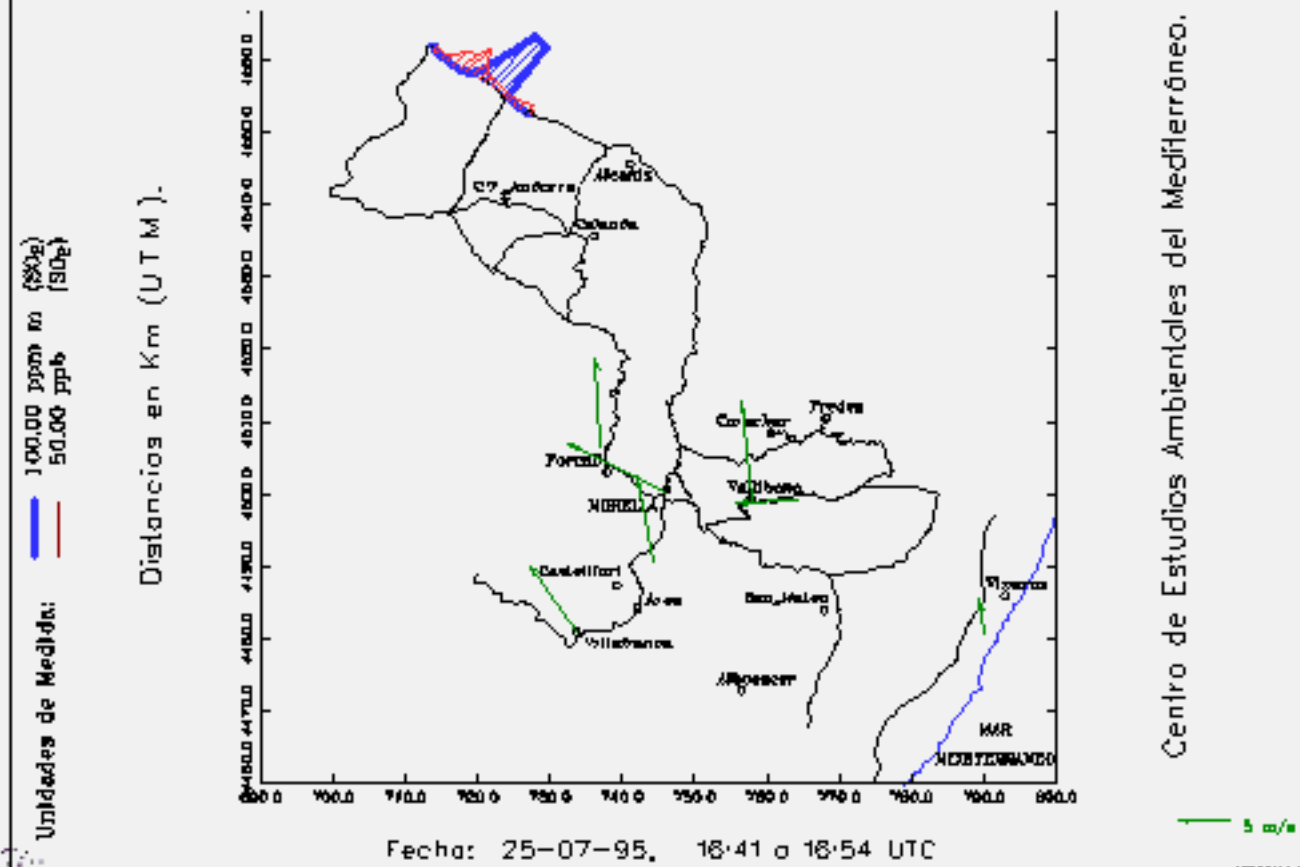

- **Concentration aloft**
- **Ground-level Concentration**
- ➔ **10 m.a.g.l. Wind Vector**

- **Particles between 0 and 2 h since emission**
- **Particles between 2 and 4 h since emission**
- **Particles between 4 and 6 h since emission**

**DAY 25/07/95**

**18:00 UTC**

**LPDM SIMULTIONS**

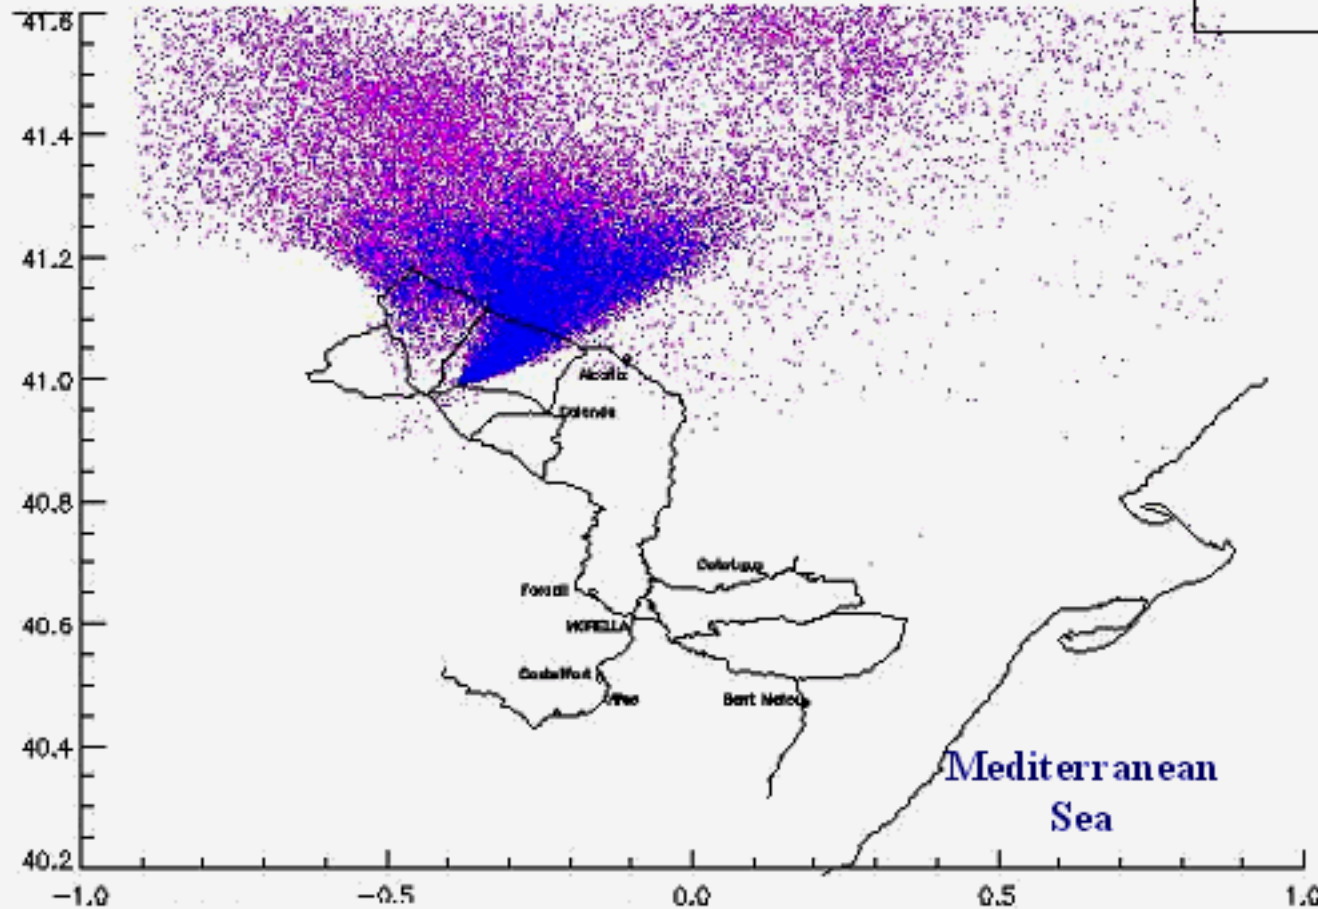

**SIMULTANEOUS MEASUREMENTS**

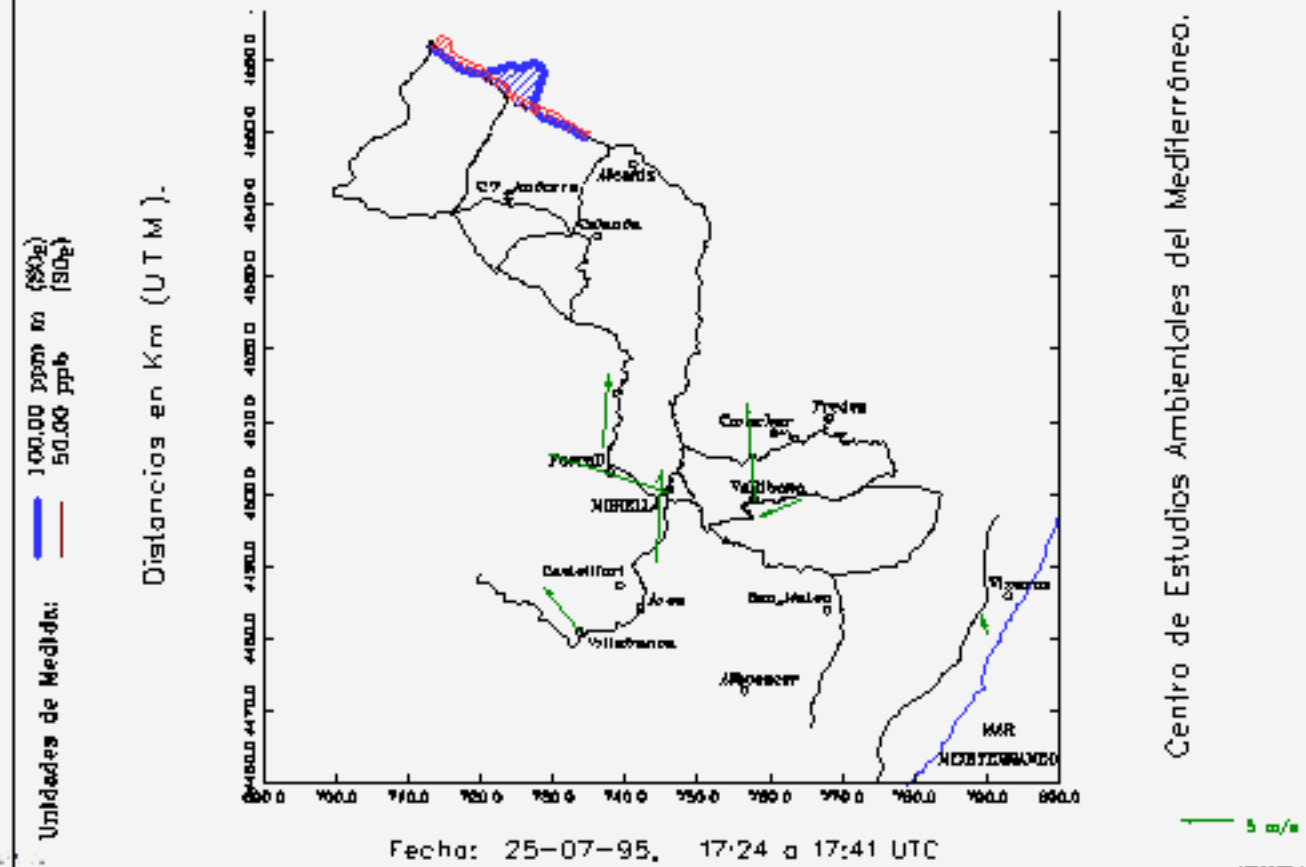

- **Concentration aloft**
- **Ground-level Concentration**
- ➔ **10 m.a.g.l. Wind Vector**

- **Particles between 0 and 2 h since emission**
- **Particles between 2 and 4 h since emission**
- **Particles between 4 and 6 h since emission**

**DAY 25/07/95**

**19:00 UTC**

LPDM SIMULTIONS

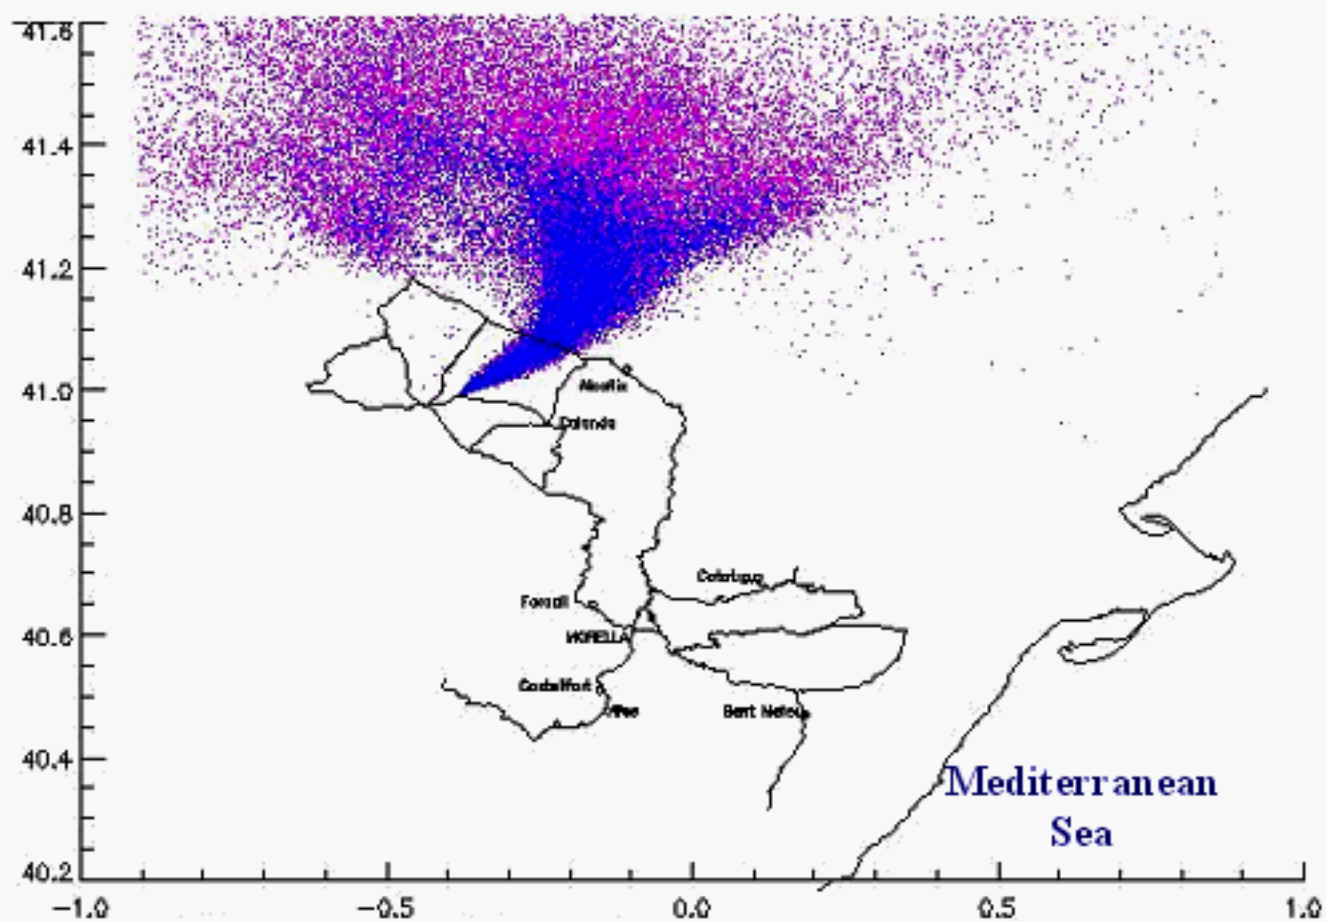

- Particles between 0 and 2 h since emission
- Particles between 2 and 4 h since emission
- Particles between 4 and 6 h since emission



**DAY 25/07/95**

**20:00 UTC**

LPDM SIMULTIONS

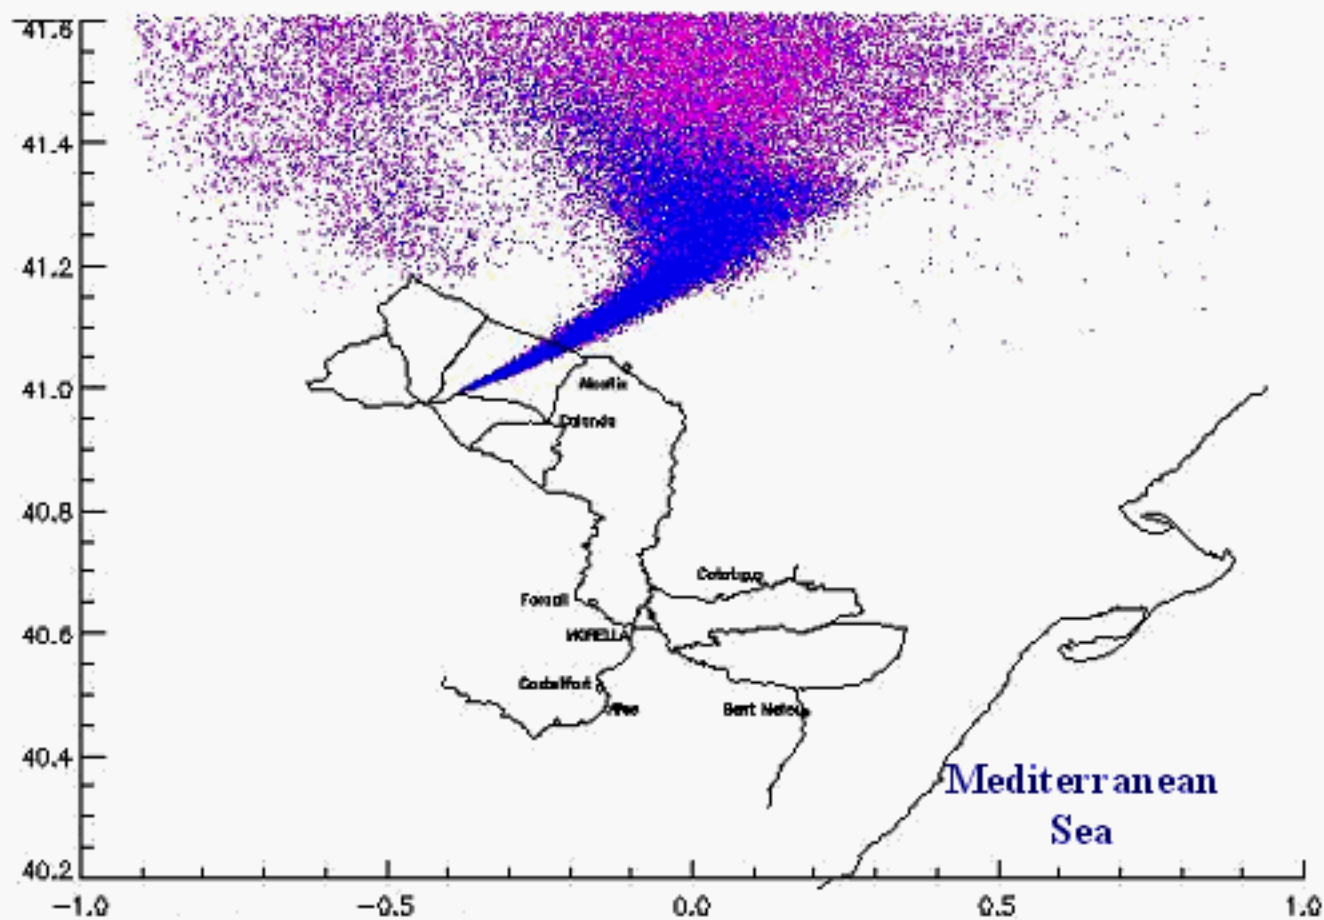

- Particles between 0 and 2 h since emission
- Particles between 2 and 4 h since emission
- Particles between 4 and 6 h since emission

**DAY 25/07/95**

**21:00 UTC**

LPDM SIMULTIONS

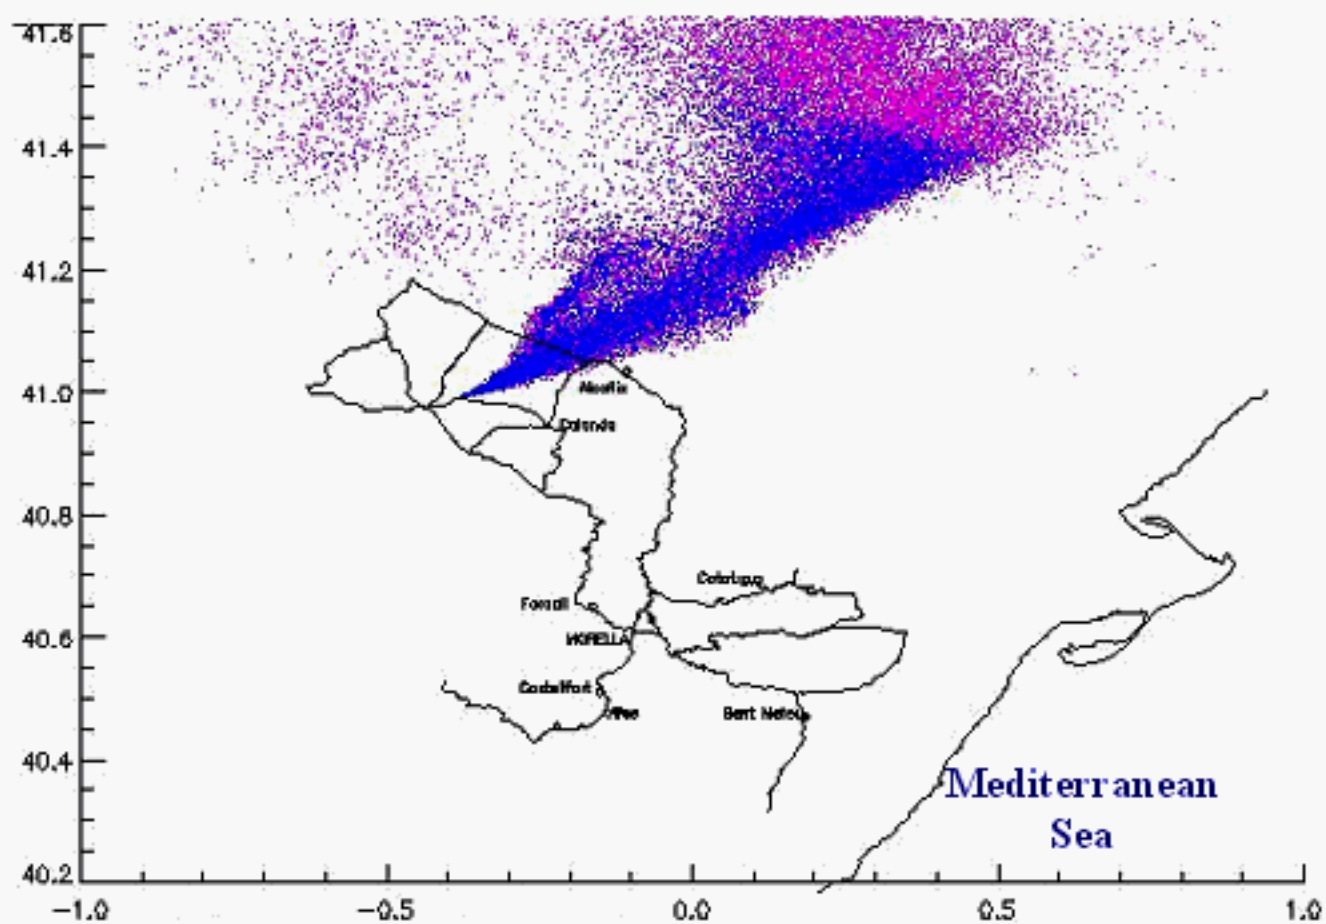

- Particles between 0 and 2 h since emission
- Particles between 2 and 4 h since emission
- Particles between 4 and 6 h since emission



**DAY 25/07/95**

**23:00 UTC**

LPDM SIMULTIONS

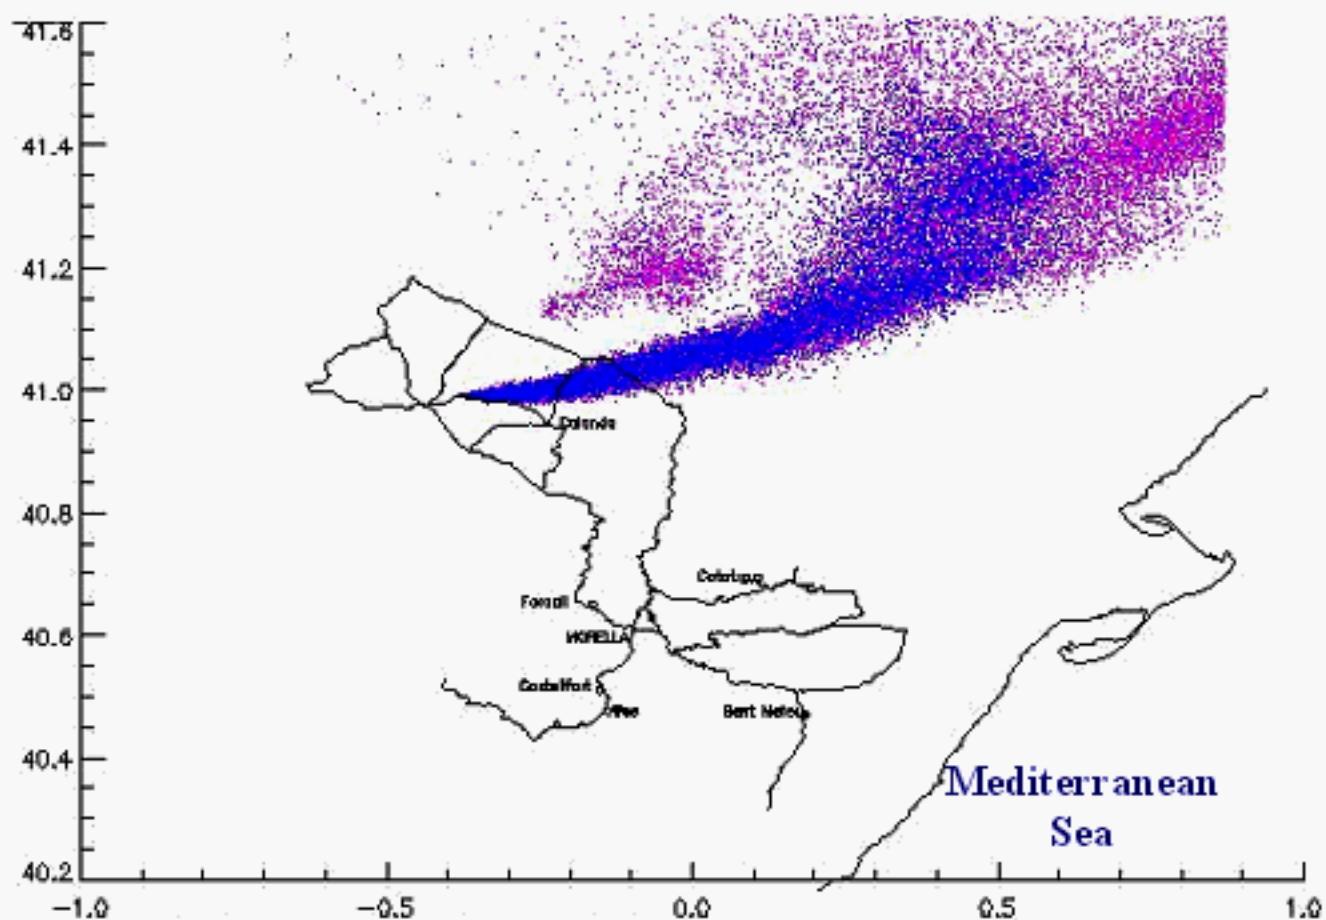

- Particles between 0 and 2 h since emission
- Particles between 2 and 4 h since emission
- Particles between 4 and 6 h since emission



**DAY 26/07/95**

**00:00 UTC**

LPDM SIMULTIONS

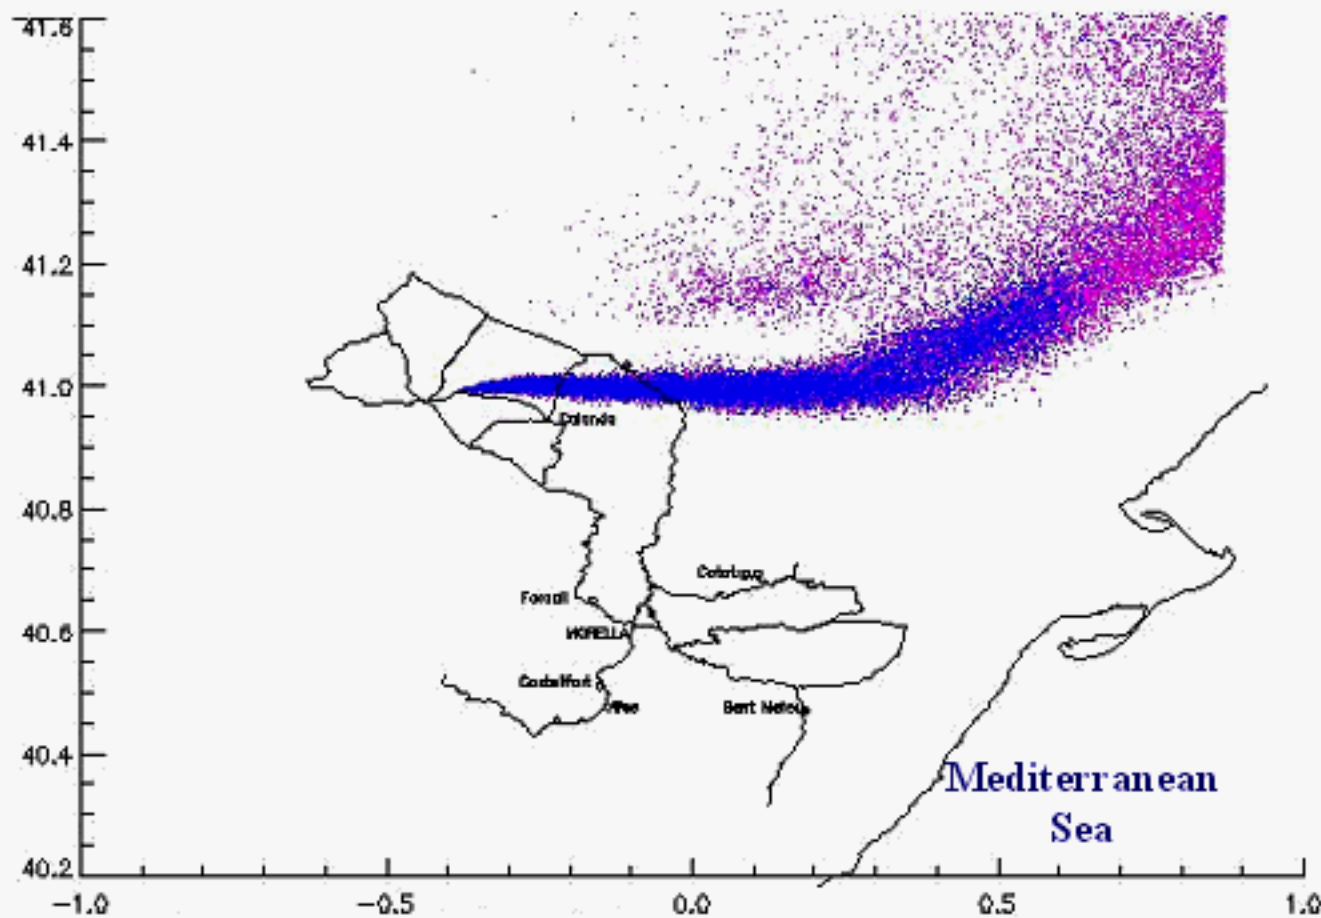

- Particles between 0 and 2 h since emission
- Particles between 2 and 4 h since emission
- Particles between 4 and 6 h since emission



**DAY 26/07/95**

**01:00 UTC**

LPDM SIMULTIONS

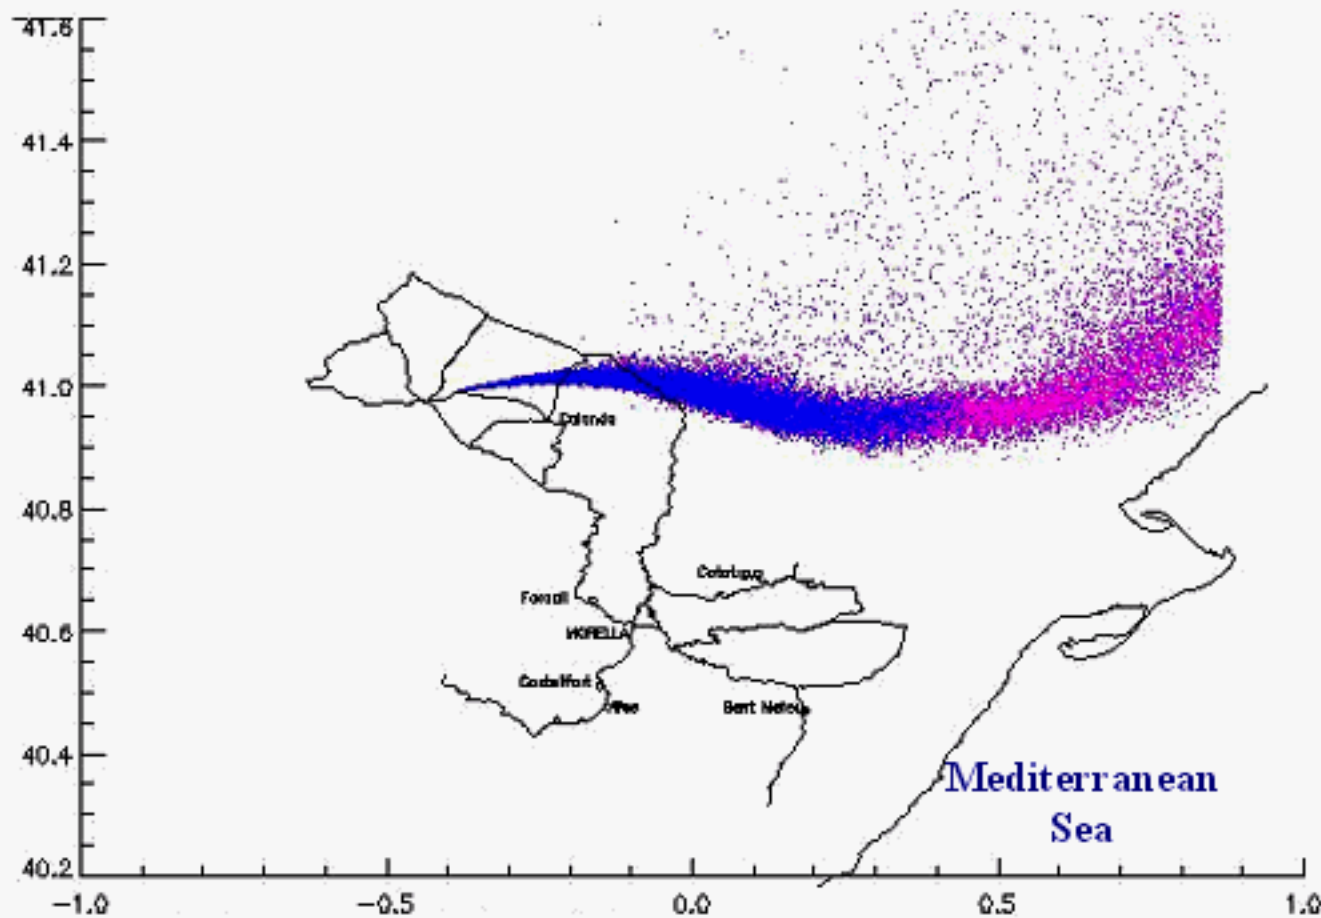

- Particles between 0 and 2 h since emission
- Particles between 2 and 4 h since emission
- Particles between 4 and 6 h since emission

**DAY 26/07/95**

**02:00 UTC**

LPDM SIMULTIONS

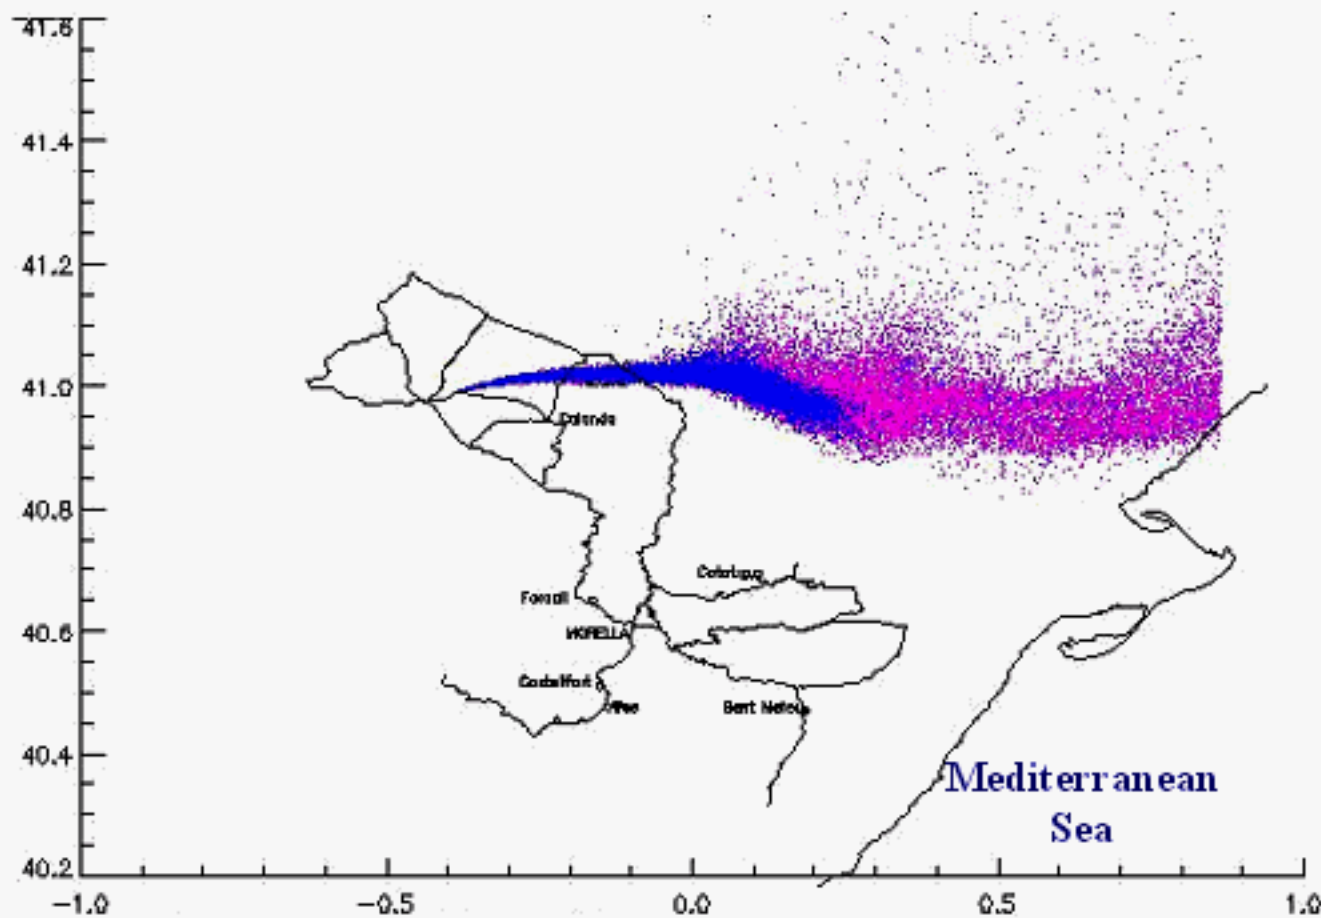

- Particles between 0 and 2 h since emission
- Particles between 2 and 4 h since emission
- Particles between 4 and 6 h since emission

**DAY 26/07/95**

**03:00 UTC**

LPDM SIMULTIONS

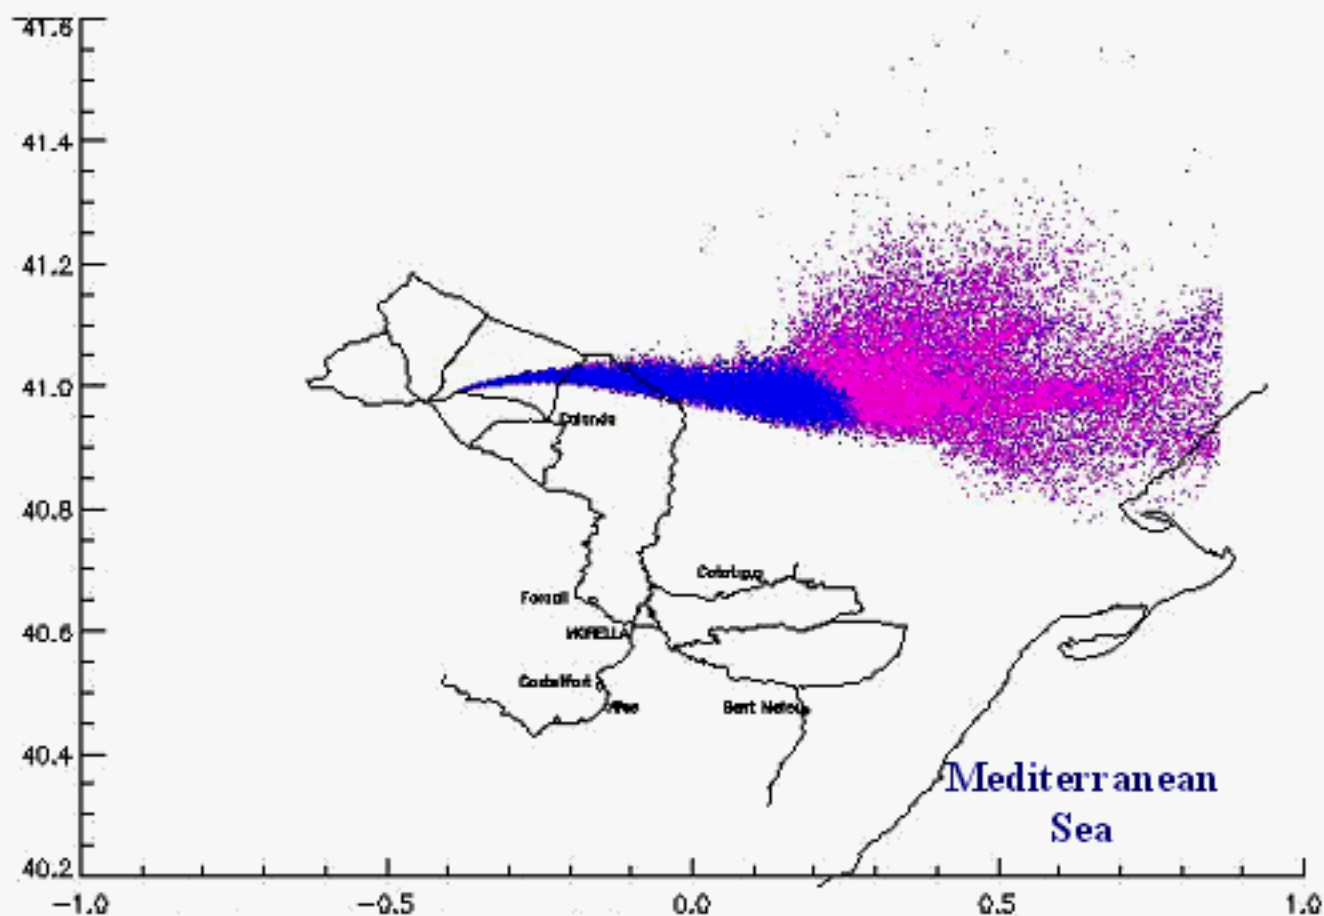

- Particles between 0 and 2 h since emission
- Particles between 2 and 4 h since emission
- Particles between 4 and 6 h since emission

**DAY 26/07/95**

**04:00 UTC**

LPDM SIMULTIONS

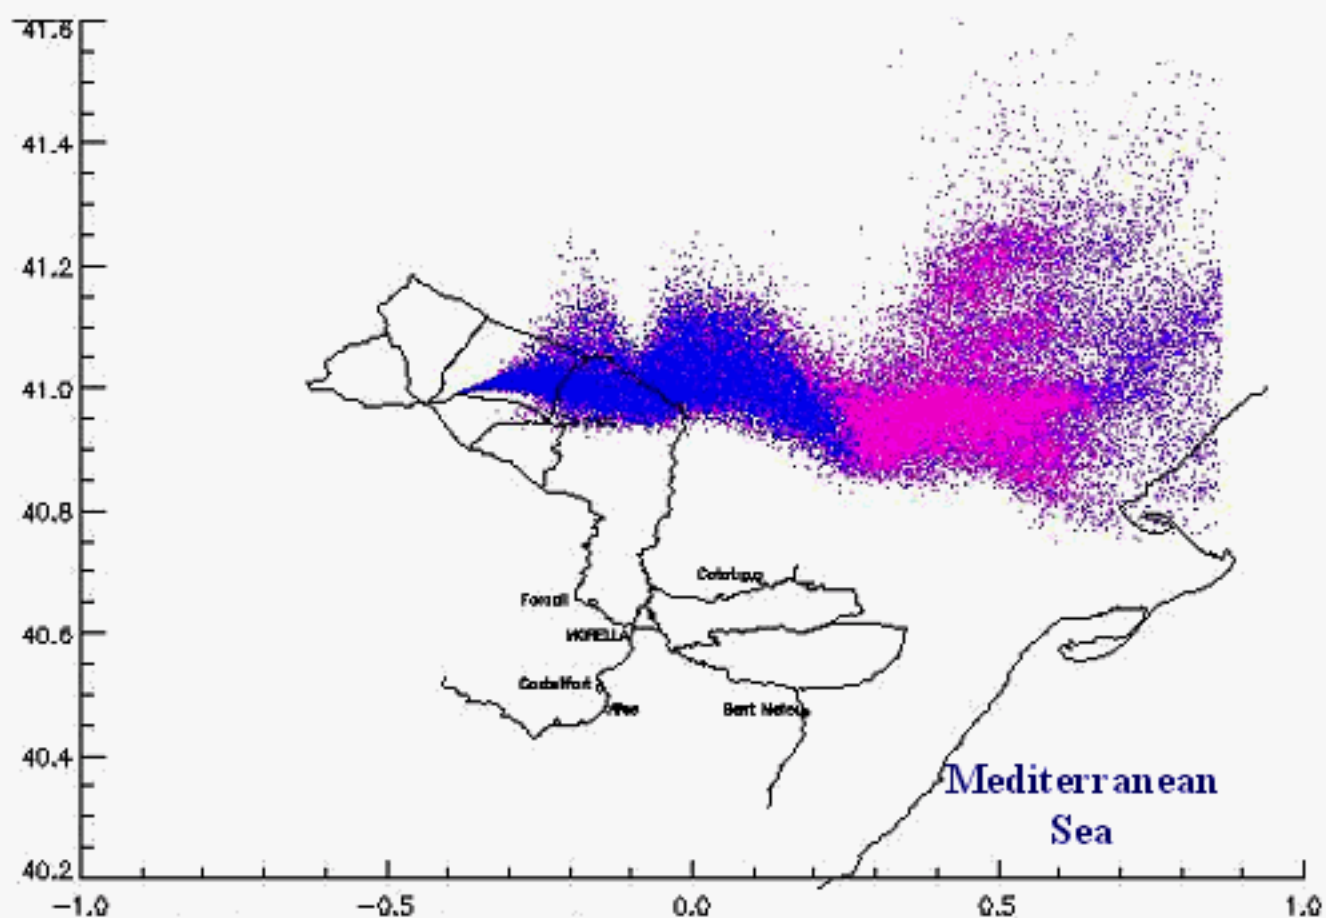

- Particles between 0 and 2 h since emission
- Particles between 2 and 4 h since emission
- Particles between 4 and 6 h since emission

**DAY 26/07/95**

**05:00 UTC**

LPDM SIMULTIONS

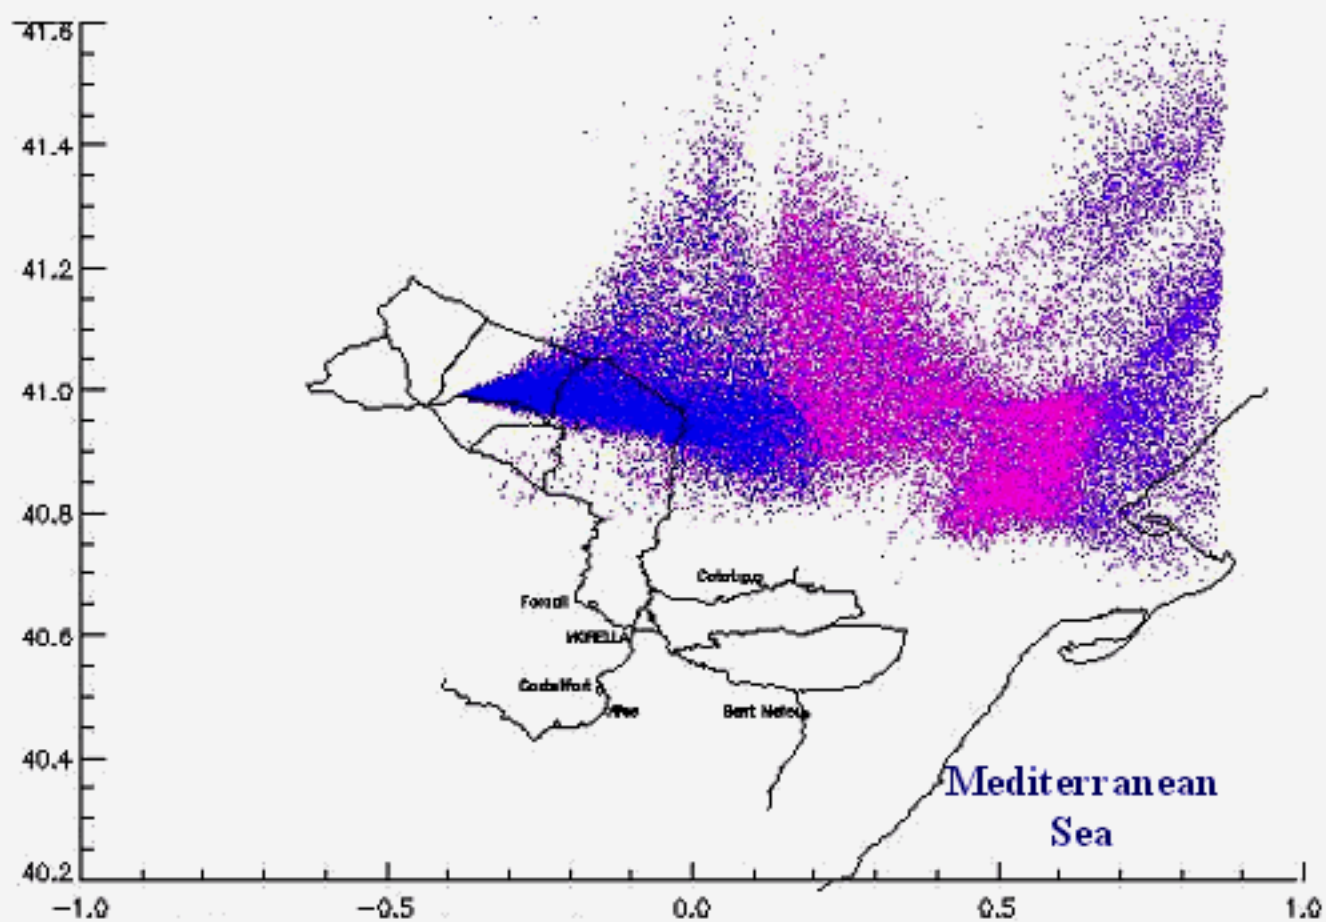

- Particles between 0 and 2 h since emission
- Particles between 2 and 4 h since emission
- Particles between 4 and 6 h since emission





**DAY 26/07/95**

**07:00 UTC**

**LPDM SIMULTIONS**

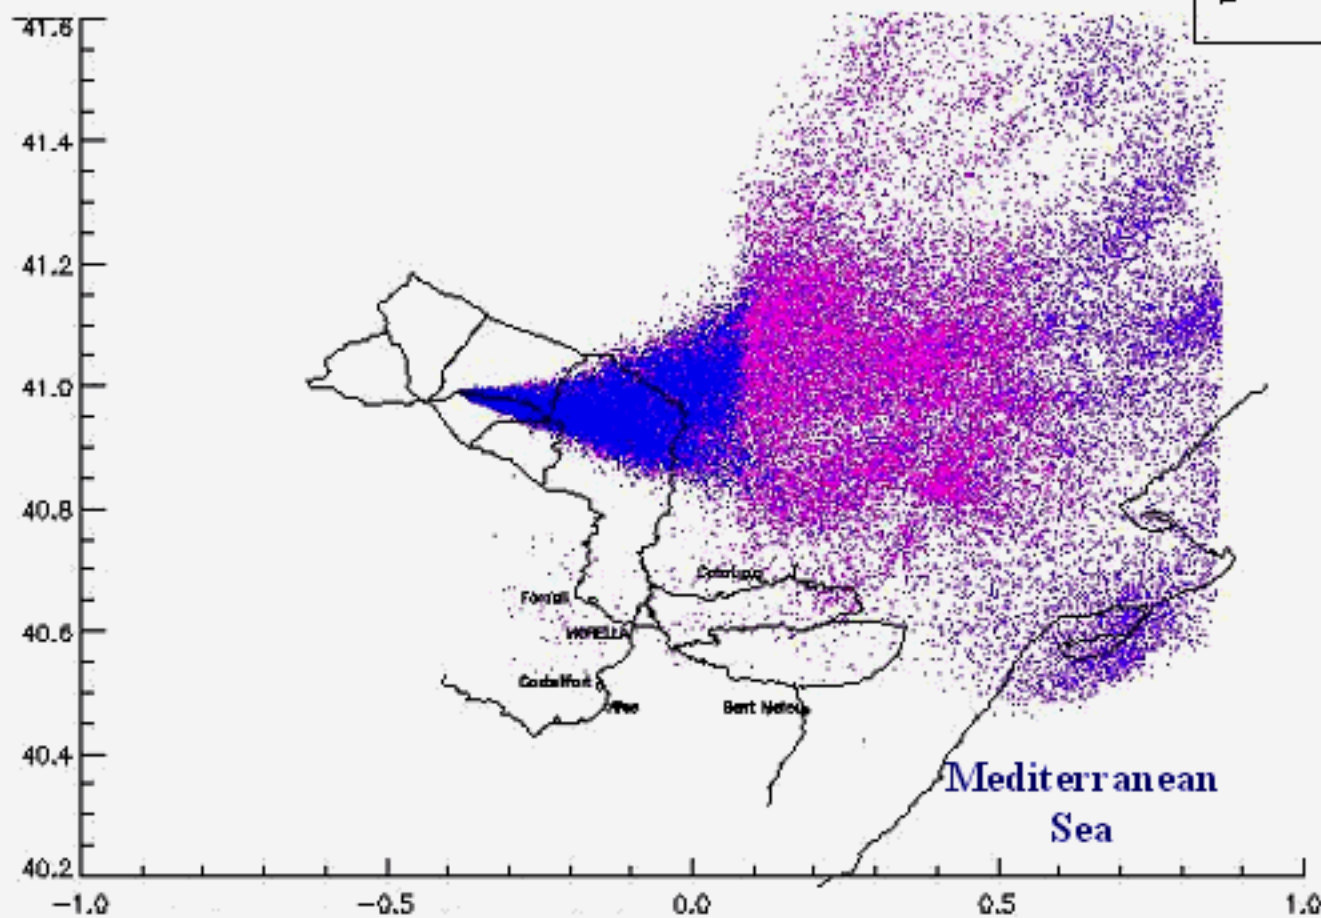

**SIMULTANEOUS MEASUREMENTS**

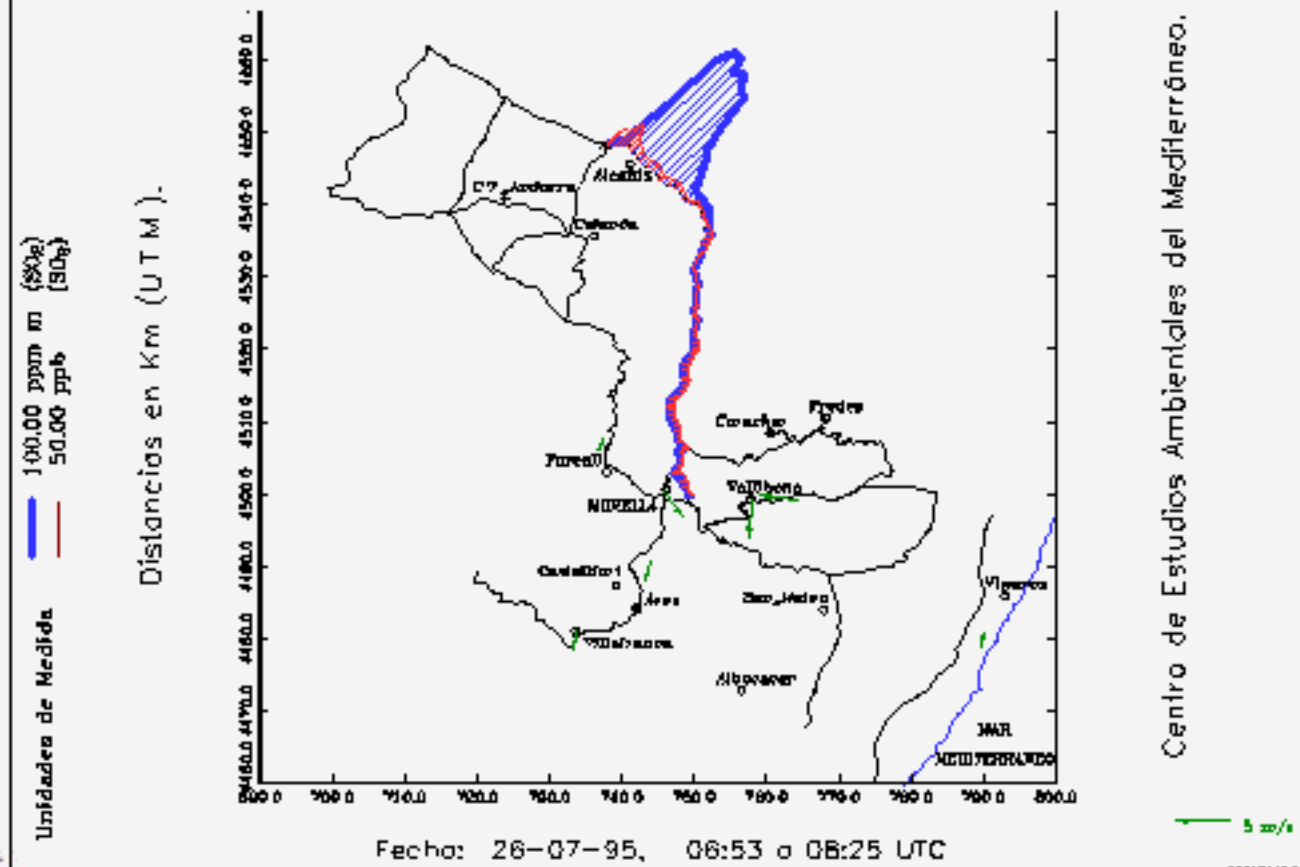

- **Concentration aloft**
- **Ground-level Concentration**
- ➔ **10 m.a.g.l. Wind Vector**

- **Particles between 0 and 2 h since emission**
- **Particles between 2 and 4 h since emission**
- **Particles between 4 and 6 h since emission**

**DAY 26/07/95**

**08:00 UTC**

### LPDM SIMULTIONS

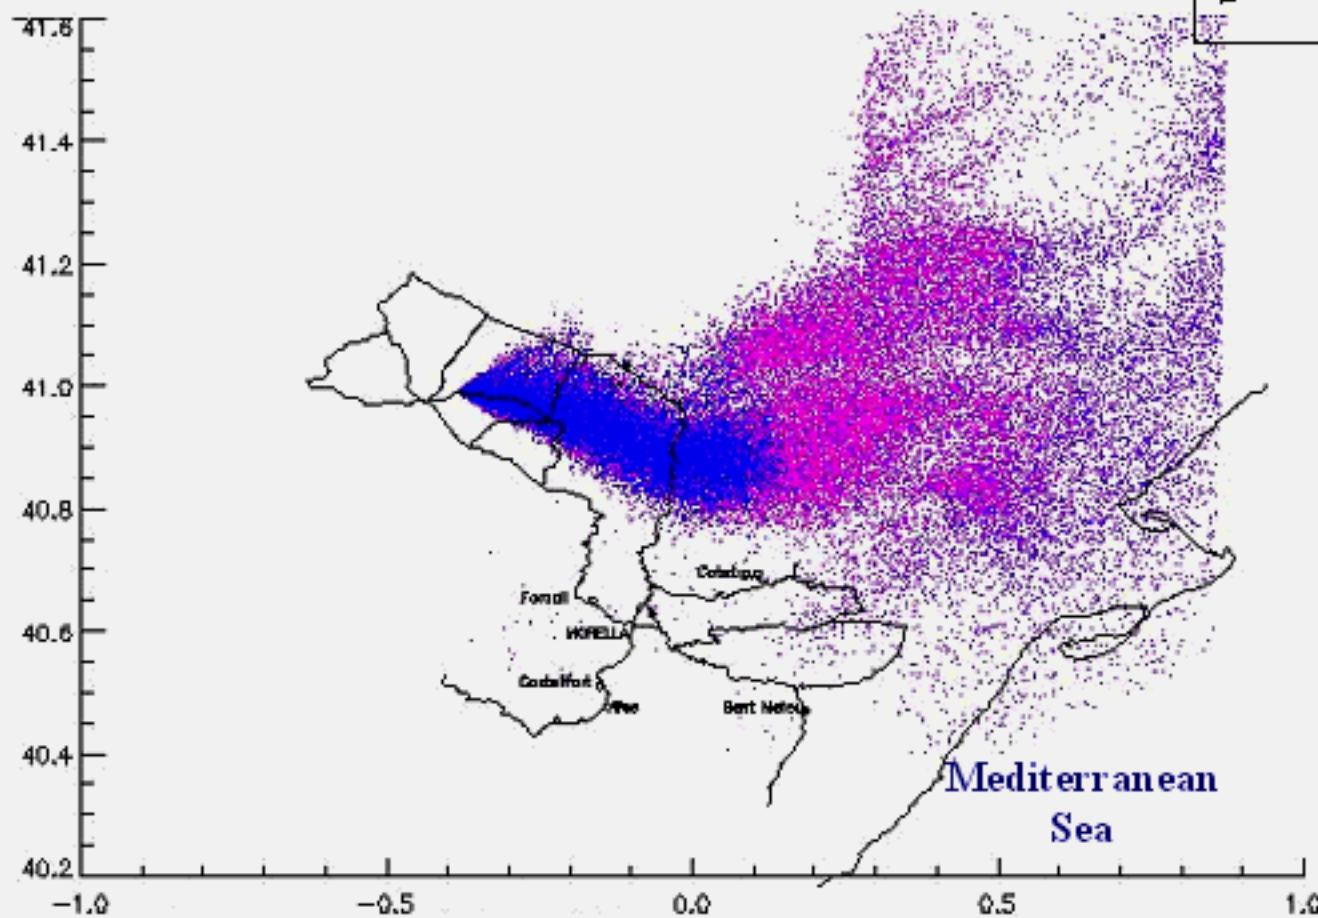

### SIMULTANEOUS MEASUREMENTS

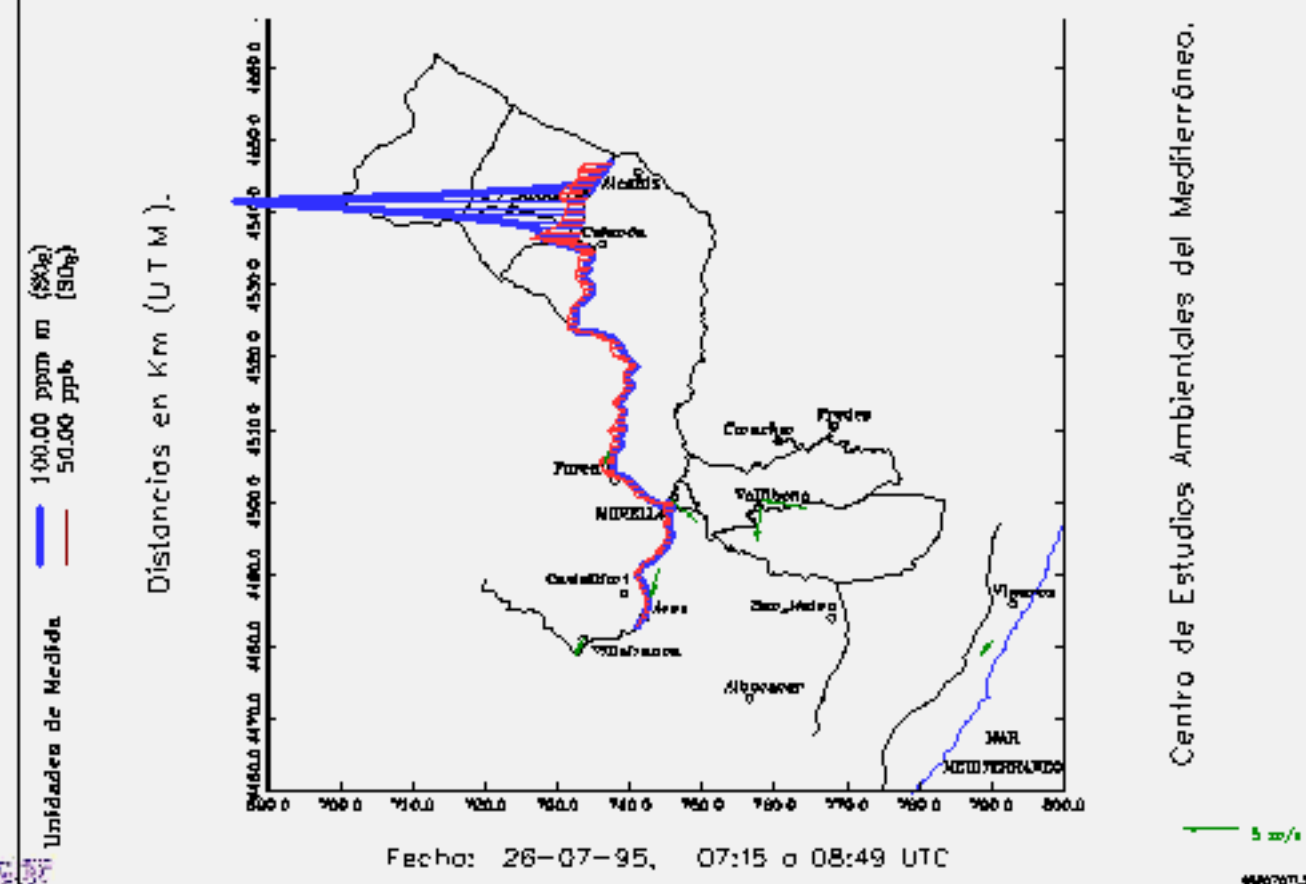

- Concentration aloft
- Ground-level Concentration
- ➔ 10 m.a.g.l. Wind Vector

- Particles between 0 and 2 h since emission
- Particles between 2 and 4 h since emission
- Particles between 4 and 6 h since emission



**DAY 26/07/95**

**09:00 UTC**

**LPDM SIMULTIONS**

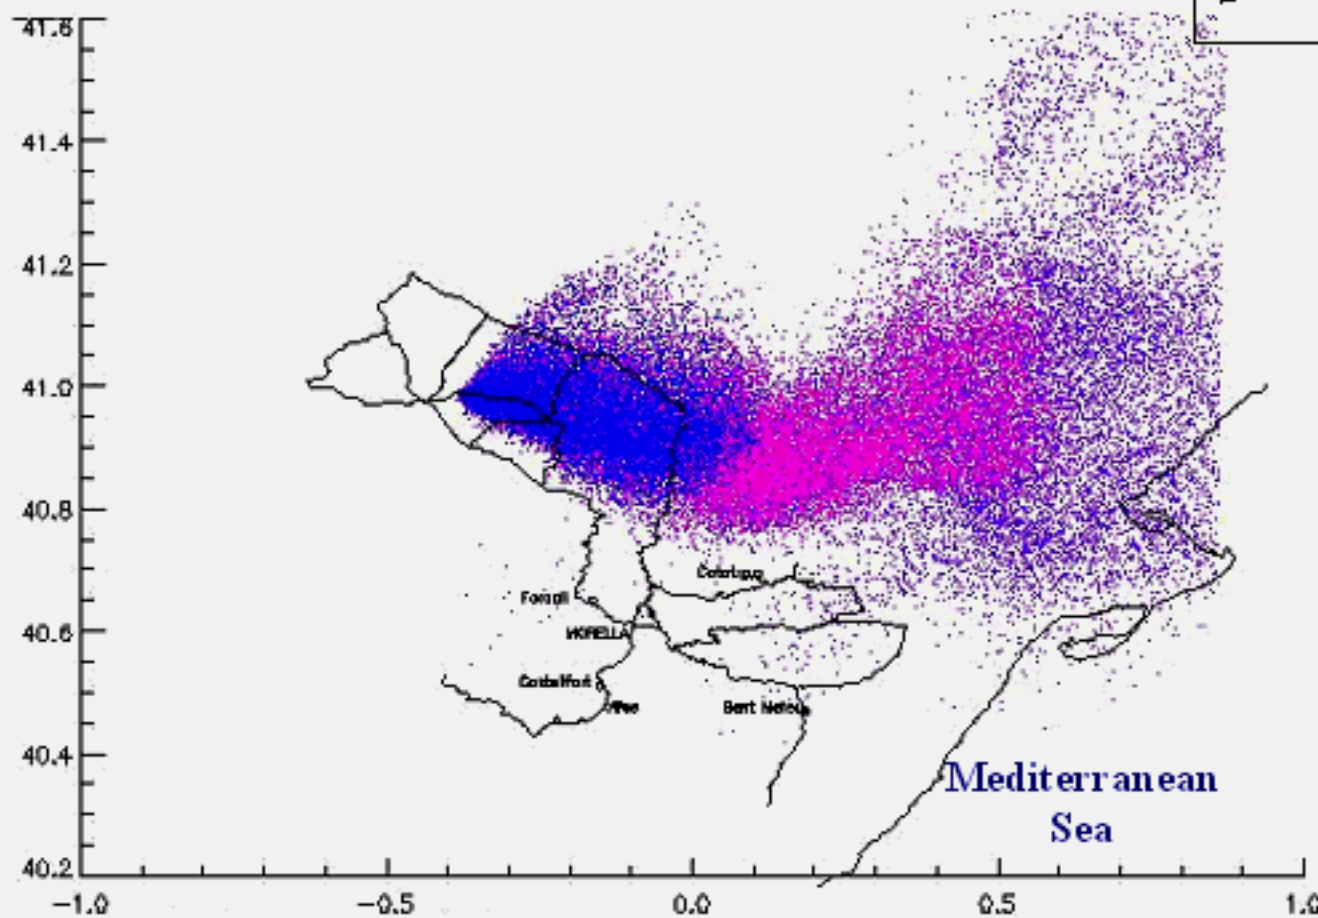

**SIMULTANEOUS MEASUREMENTS**

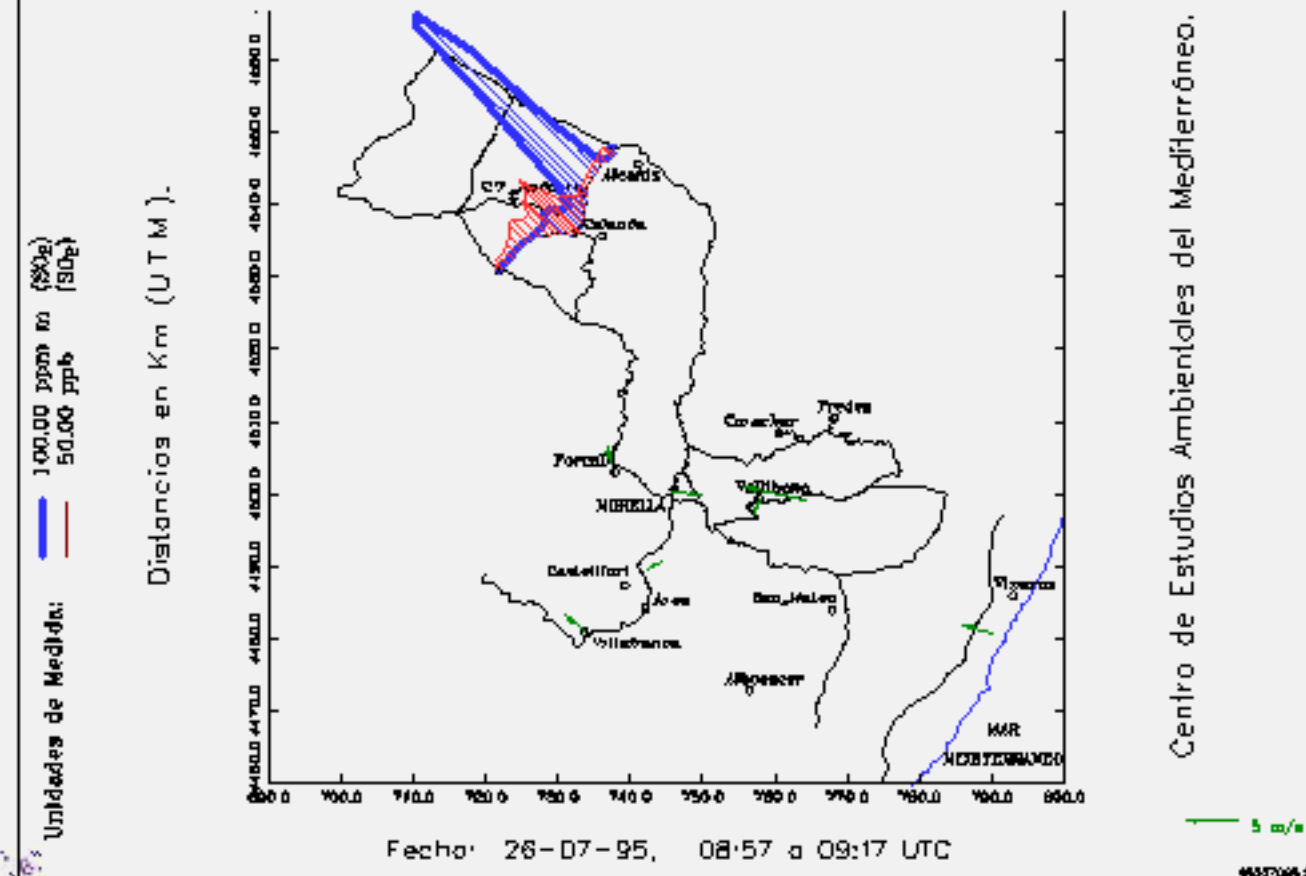

- **Concentration aloft**
- **Ground-level Concentration**
- ➔ **10 m.a.g.l. Wind Vector**

- **Particles between 0 and 2 h since emission**
- **Particles between 2 and 4 h since emission**
- **Particles between 4 and 6 h since emission**

**DAY 26/07/95**

**09:00 UTC**

### LPDM SIMULTIONS

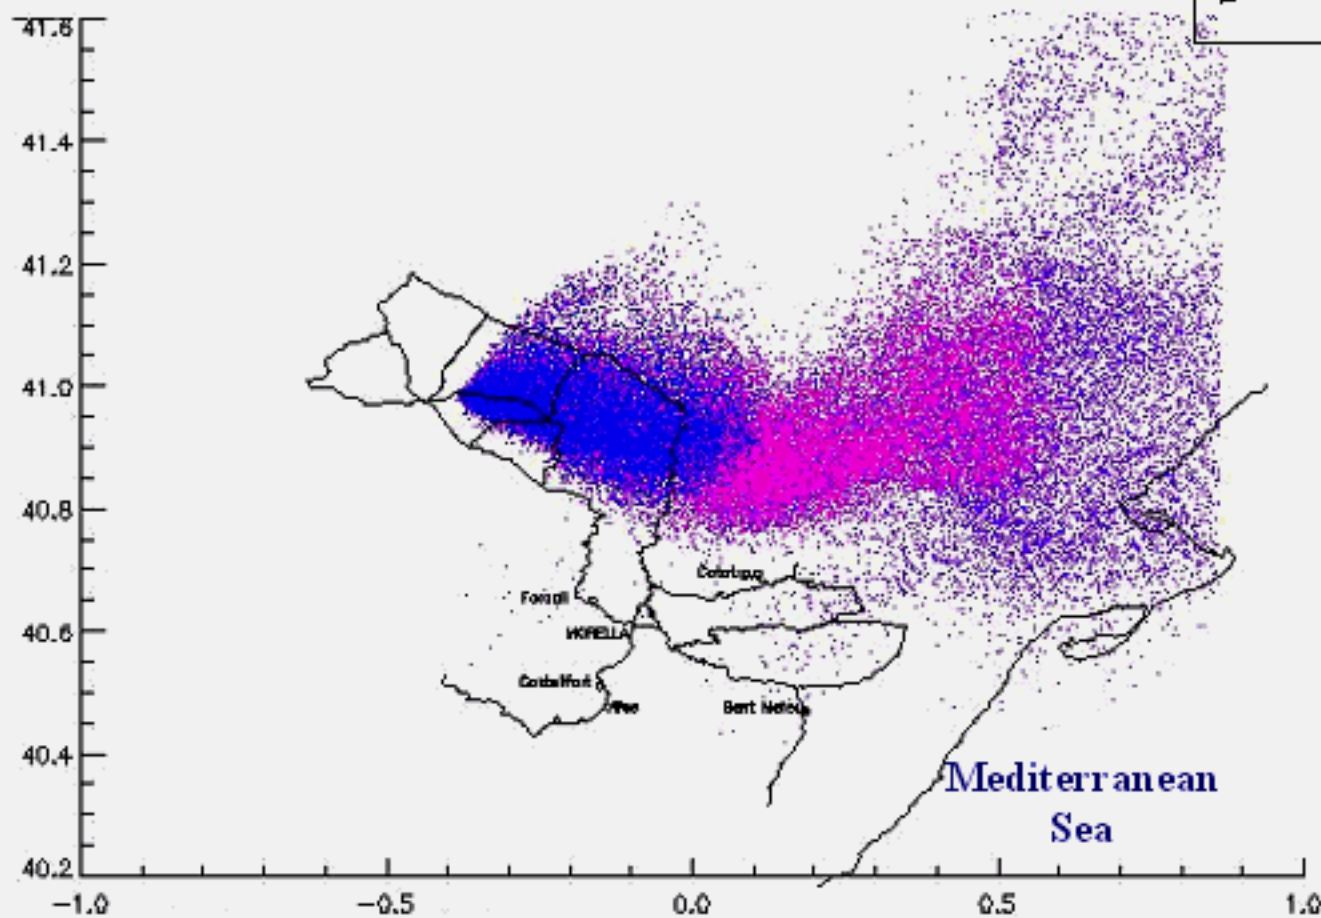

### SIMULTANEOUS MEASUREMENTS

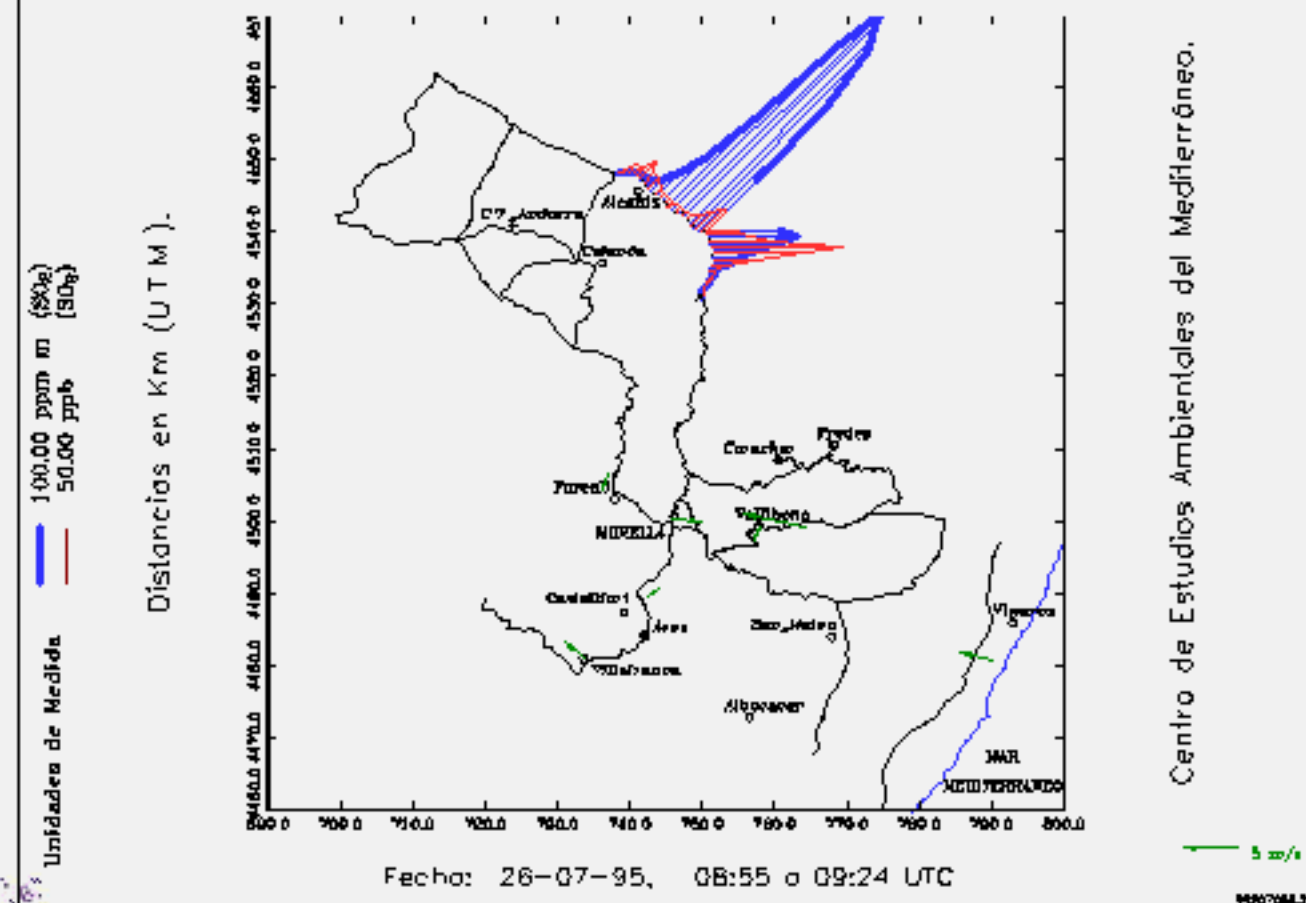

- Concentration aloft
- Ground-level Concentration
- ➔ 10 m.a.g.l. Wind Vector

- Particles between 0 and 2 h since emission
- Particles between 2 and 4 h since emission
- Particles between 4 and 6 h since emission

**DAY 26/07/95**

**10:00 UTC**

### LPDM SIMULTIONS

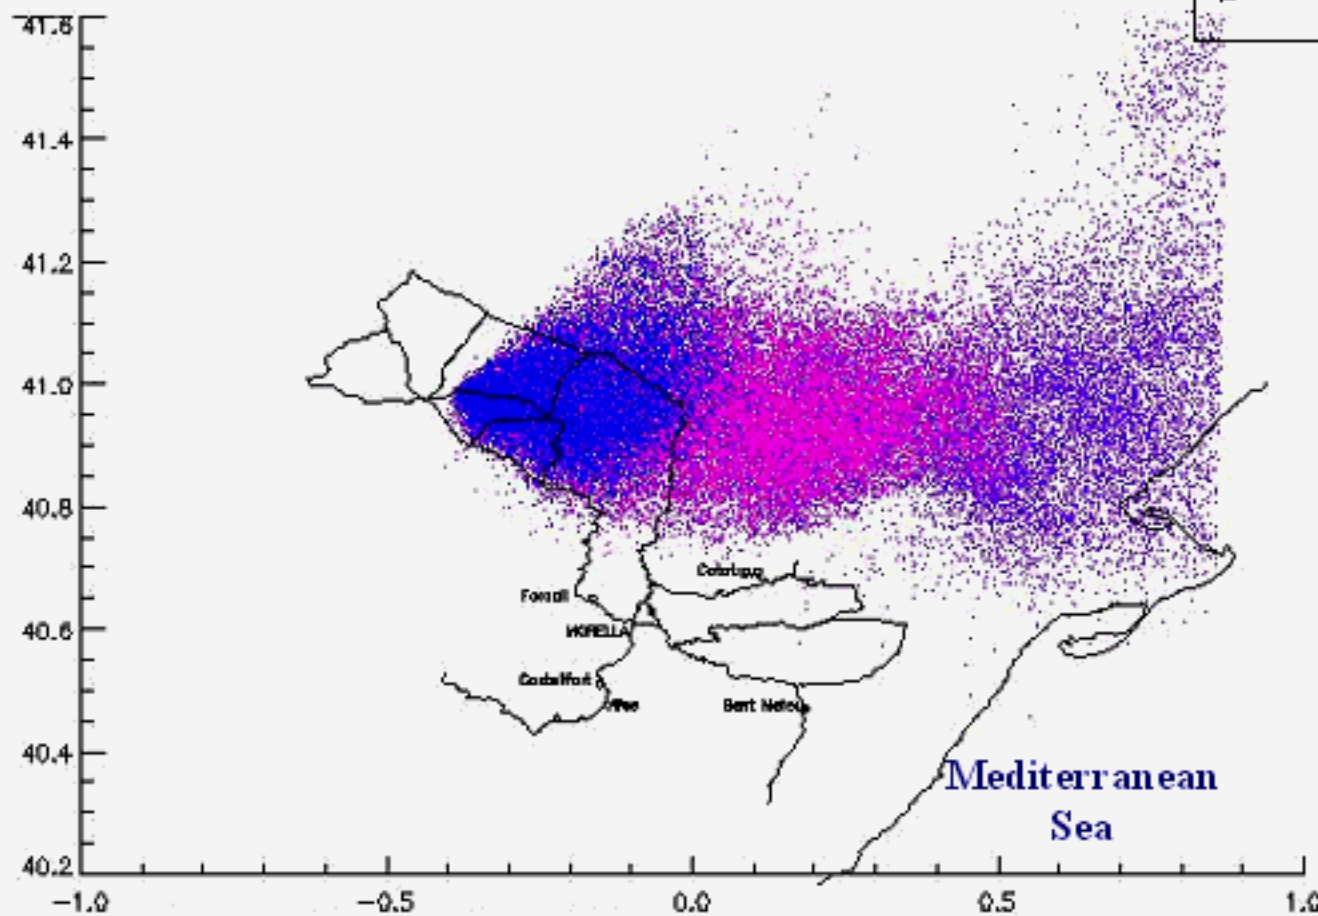

### SIMULTANEOUS MEASUREMENTS

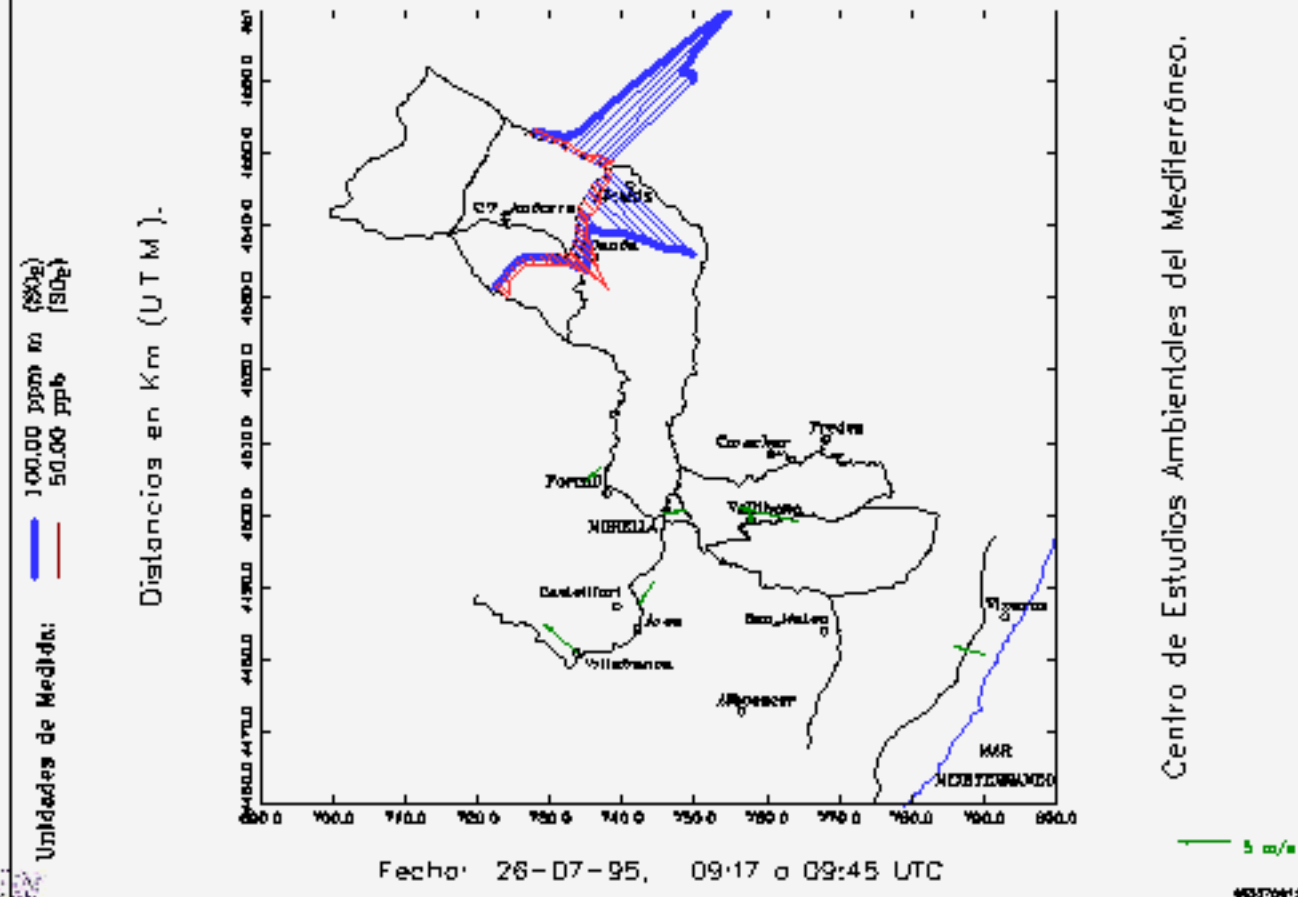

- Concentration aloft
- Ground-level Concentration
- ➔ 10 m.a.g.l. Wind Vector

- Particles between 0 and 2 h since emission
- Particles between 2 and 4 h since emission
- Particles between 4 and 6 h since emission



**DAY 26/07/95**

**10:00 UTC**

LPDM SIMULTIONS

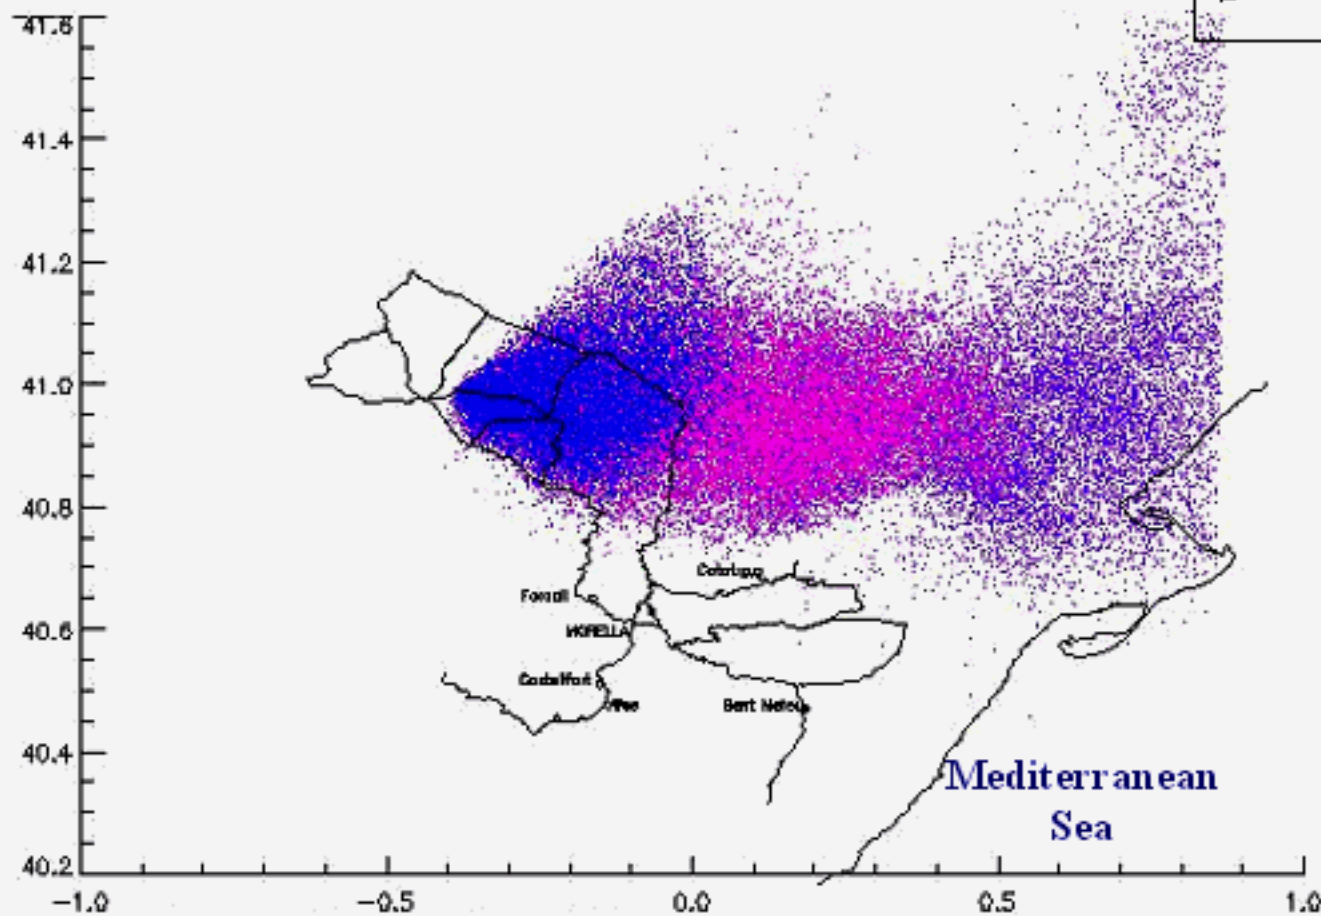

SIMULTANEOUS MEASUREMENTS

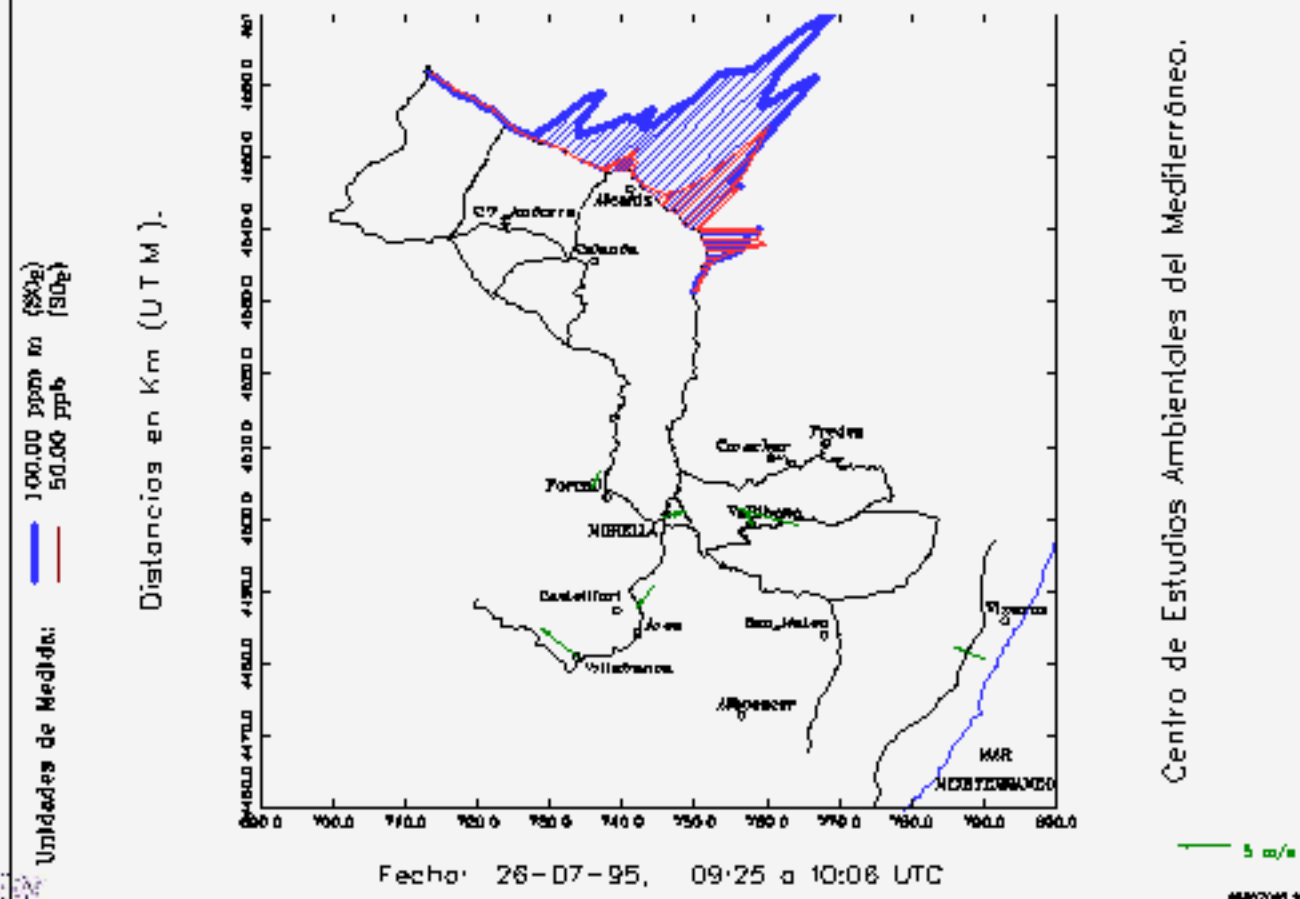

- Concentration aloft
- Ground-level Concentration
- ➔ 10 m.a.g.l. Wind Vector

- Particles between 0 and 2 h since emission
- Particles between 2 and 4 h since emission
- Particles between 4 and 6 h since emission

**DAY 26/07/95**

**11:00 UTC**

### LPDM SIMULTIONS

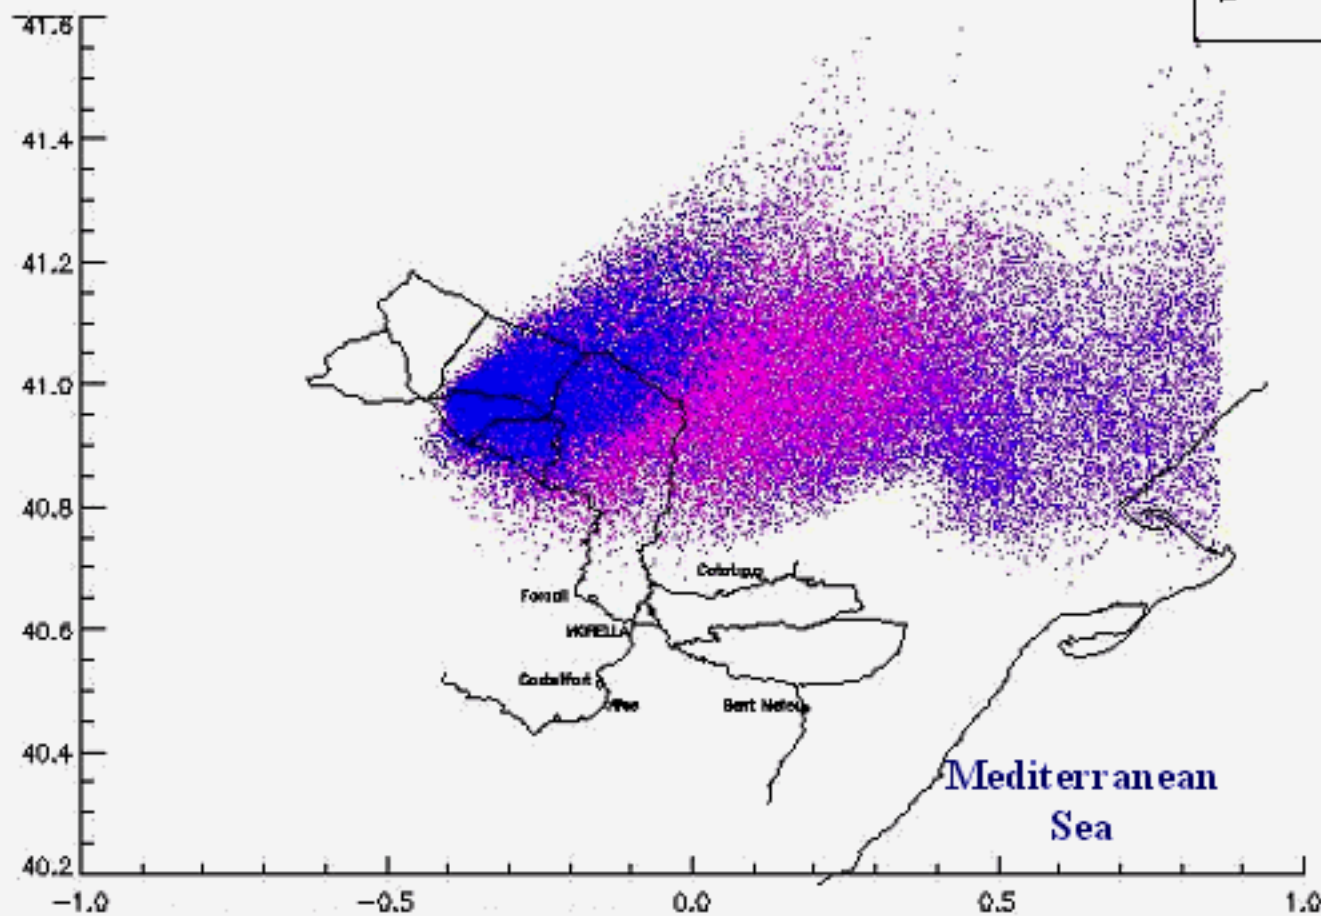

### SIMULTANEOUS MEASUREMENTS

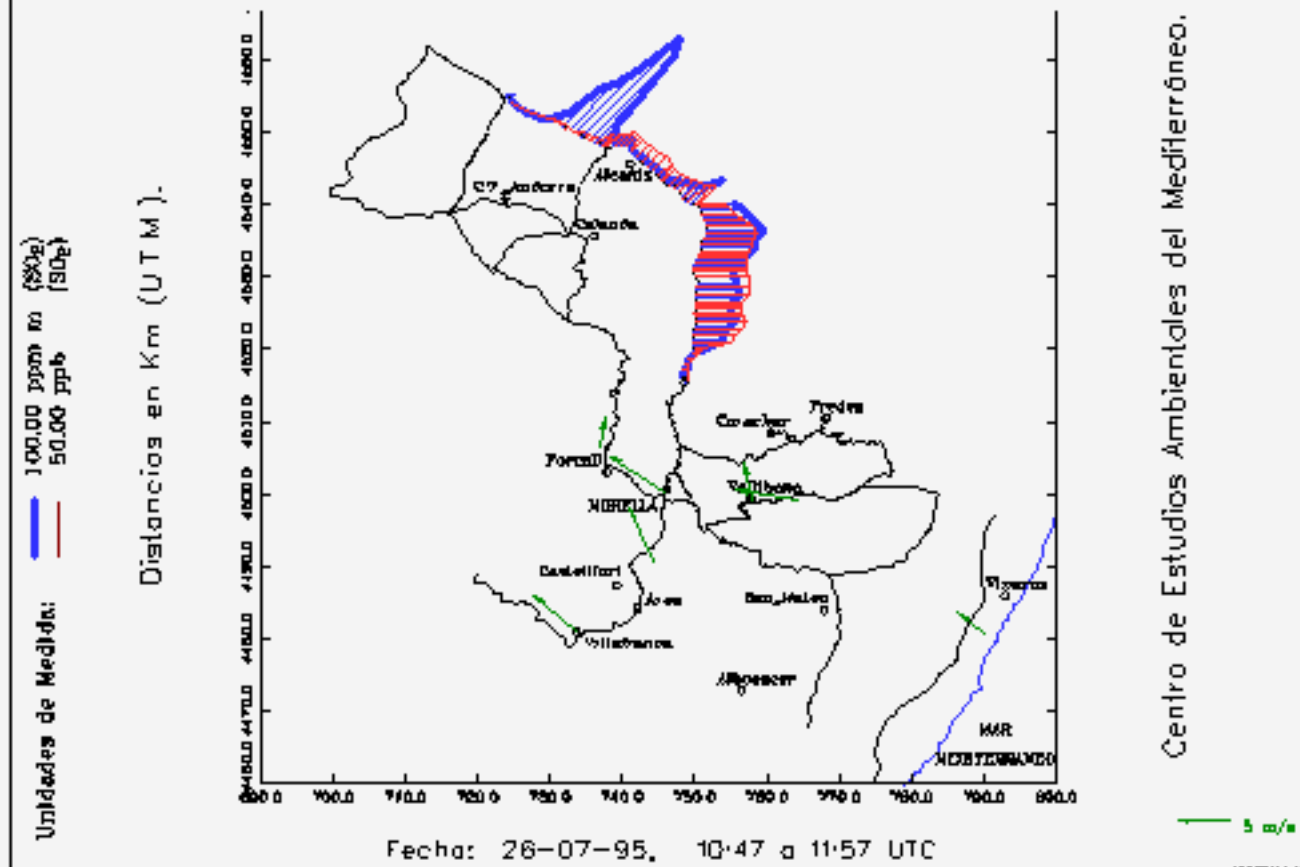

- Concentration aloft
- Ground-level Concentration
- ➔ 10 m.a.g.l. Wind Vector

- Particles between 0 and 2 h since emission
- Particles between 2 and 4 h since emission
- Particles between 4 and 6 h since emission

**DAY 26/07/95**

**12:00 UTC**

**LPDM SIMULTIONS**

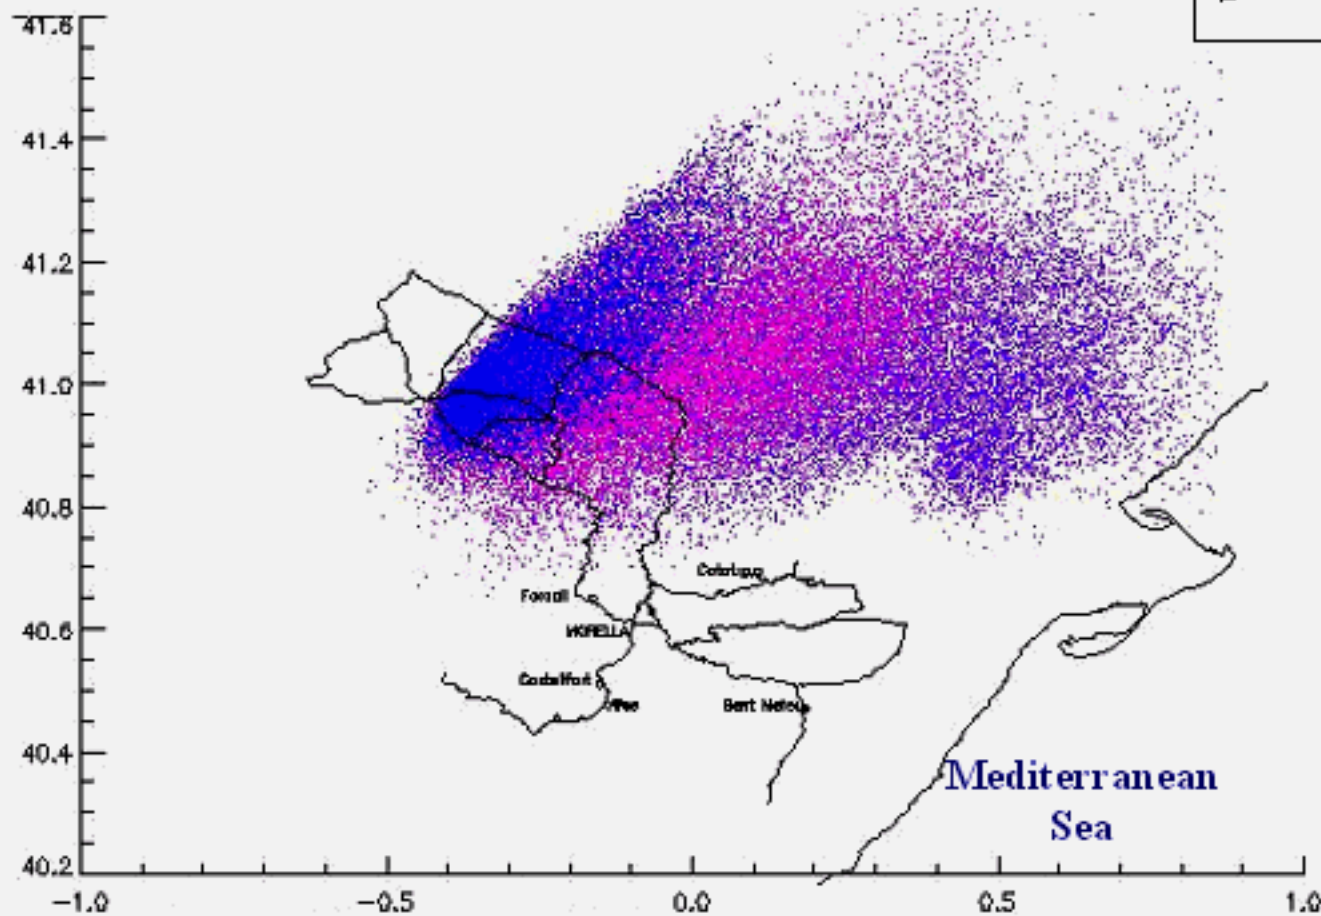

**SIMULTANEOUS MEASUREMENTS**

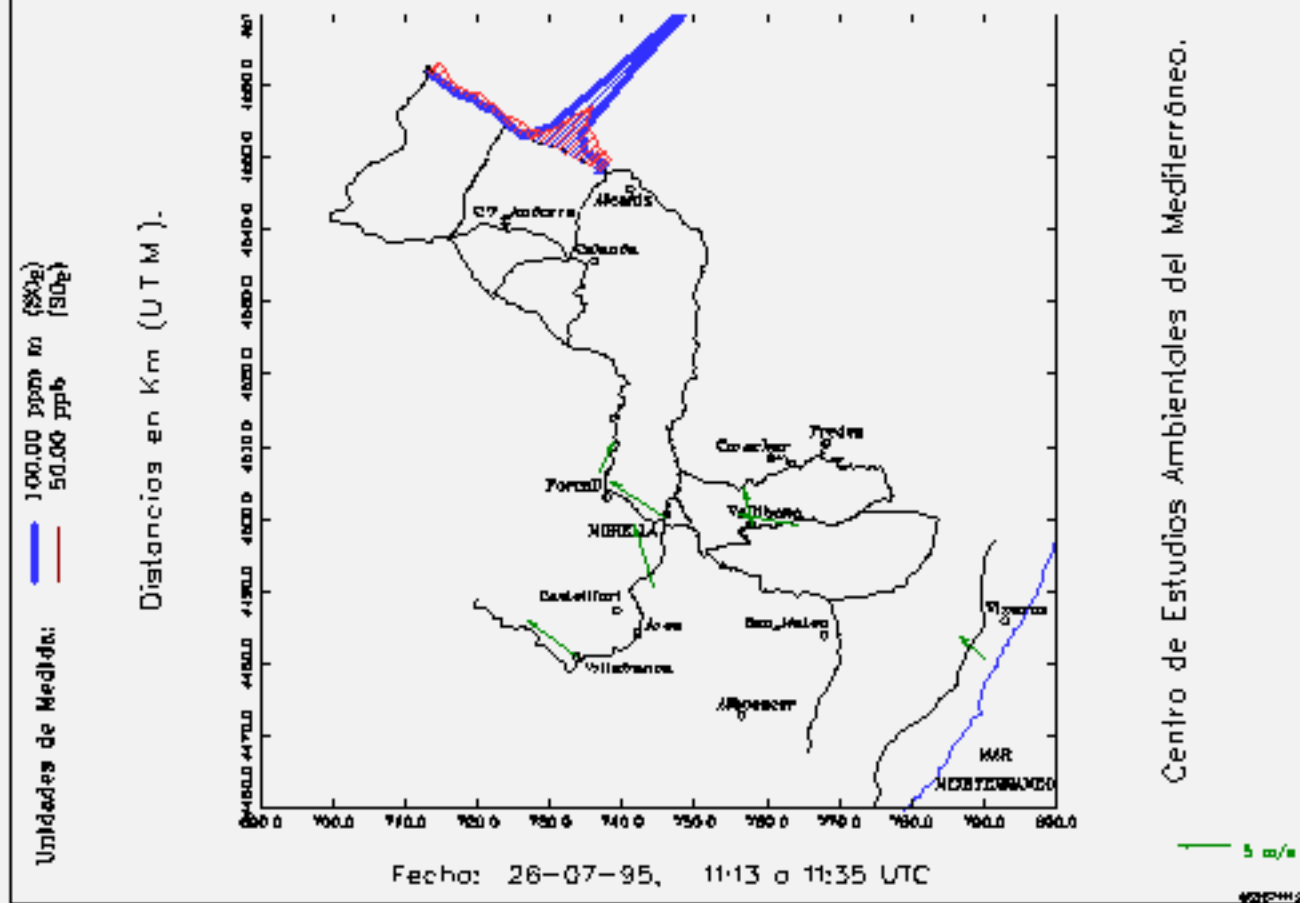

- **Concentration aloft**
- **Ground-level Concentration**
- ➔ **10 m.a.g.l. Wind Vector**

- **Particles between 0 and 2 h since emission**
- **Particles between 2 and 4 h since emission**
- **Particles between 4 and 6 h since emission**



**DAY 26/07/95**

**13:00 UTC**

### LPDM SIMULTIONS

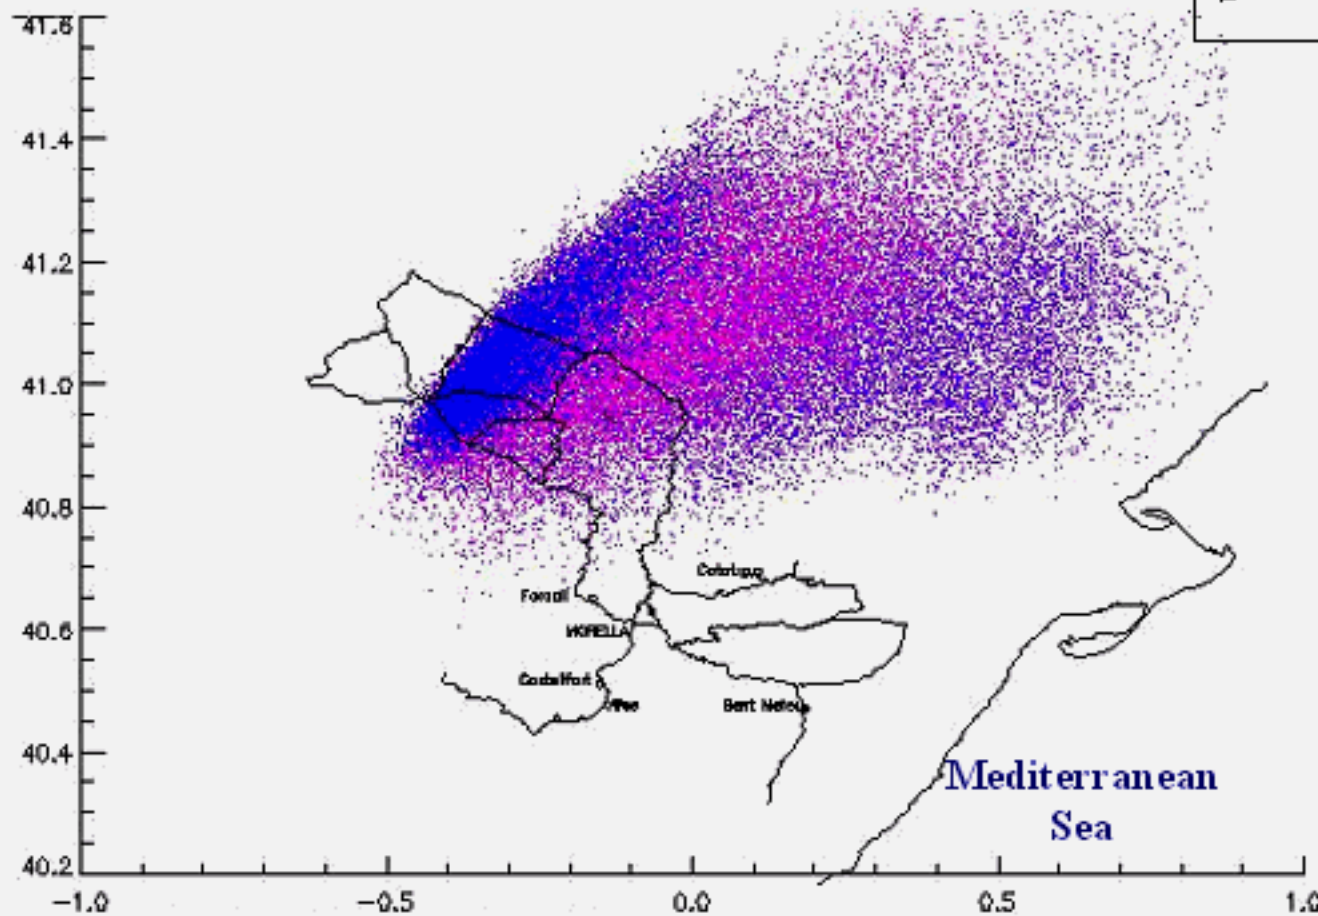

### SIMULTANEOUS MEASUREMENTS

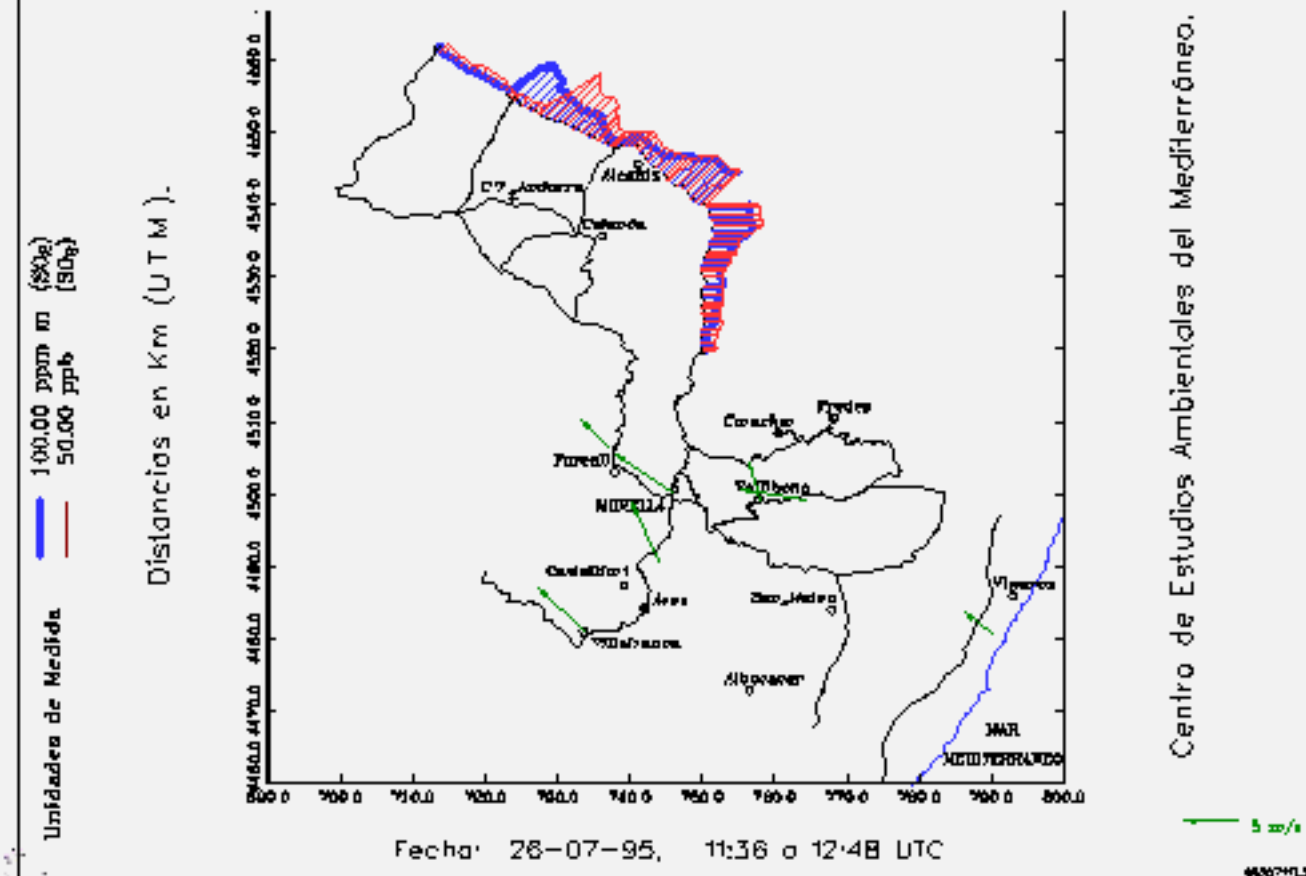

- Concentration aloft
- Ground-level Concentration
- ➔ 10 m.a.g.l. Wind Vector

- Particles between 0 and 2 h since emission
- Particles between 2 and 4 h since emission
- Particles between 4 and 6 h since emission

**DAY 26/07/95**

**14:00 UTC**

LPDM SIMULTIONS

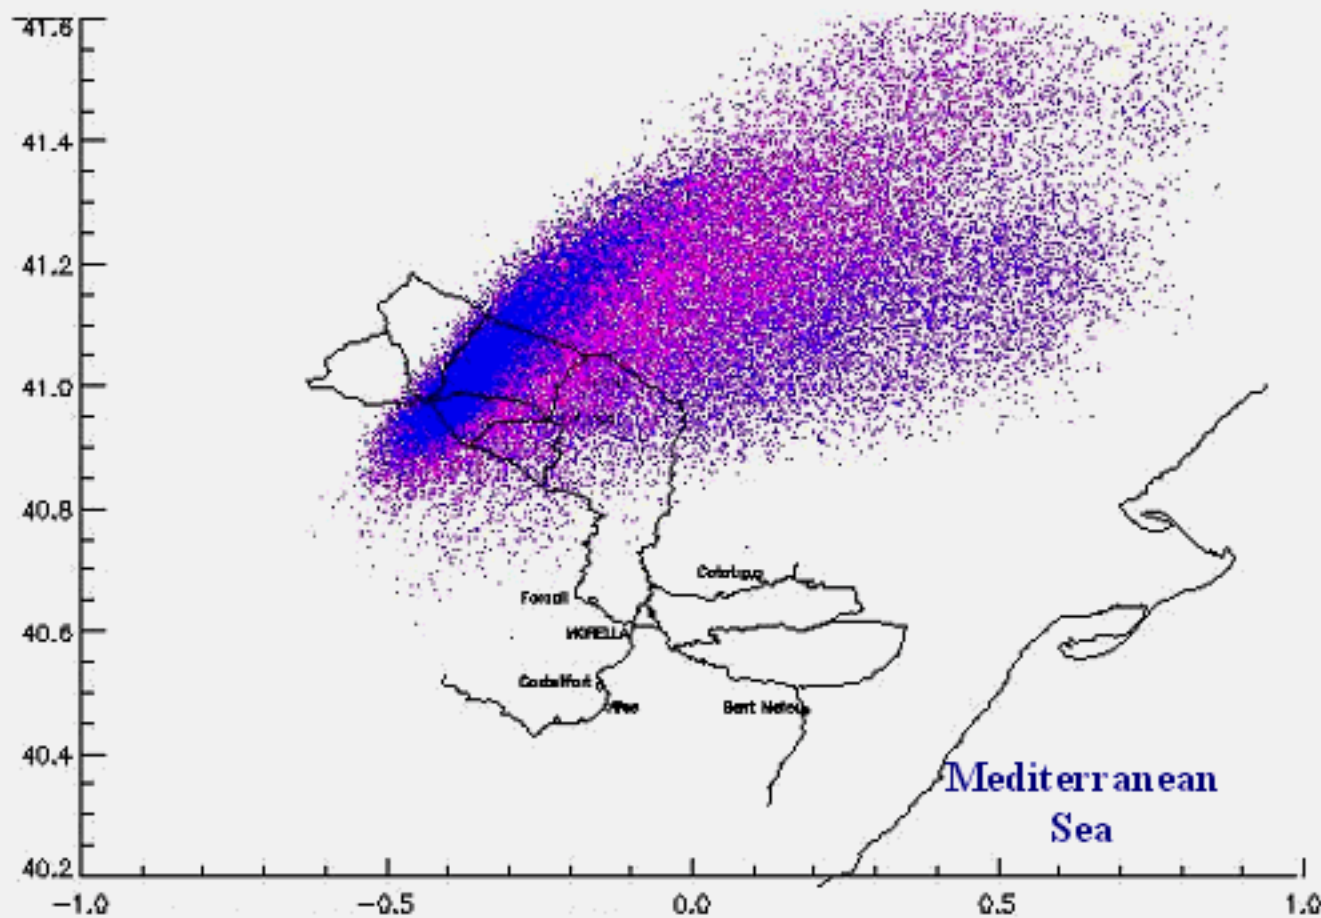

- Particles between 0 and 2 h since emission
- Particles between 2 and 4 h since emission
- Particles between 4 and 6 h since emission



**DAY 26/07/95**

**15:00 UTC**

### LPDM SIMULTIONS

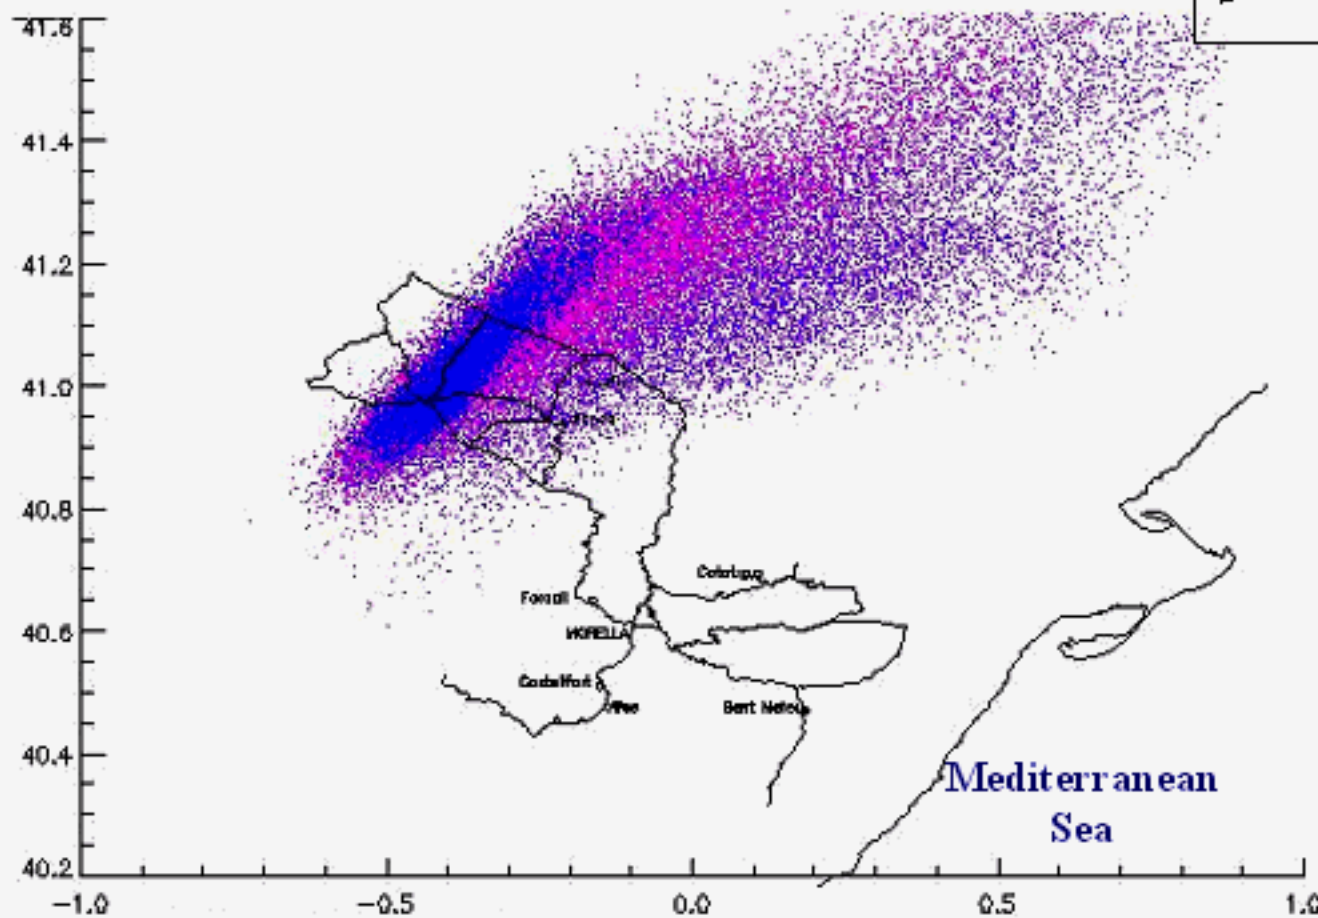

### SIMULTANEOUS MEASUREMENTS

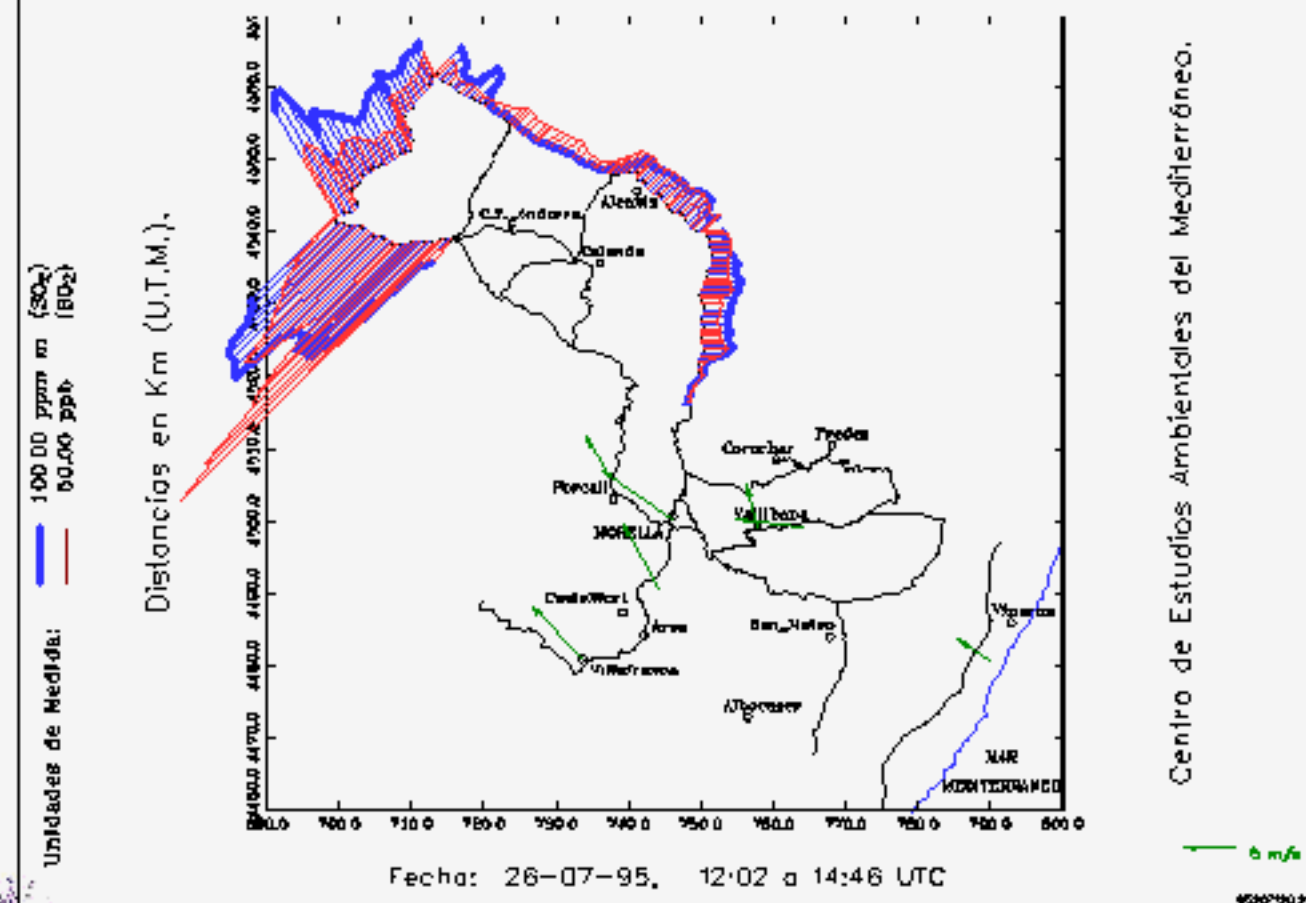

- Concentration aloft
- Ground-level Concentration
- ➔ 10 m.a.g.l. Wind Vector

- Particles between 0 and 2 h since emission
- Particles between 2 and 4 h since emission
- Particles between 4 and 6 h since emission

**DAY 26/07/95**

**16:00 UTC**

### LPDM SIMULTIONS

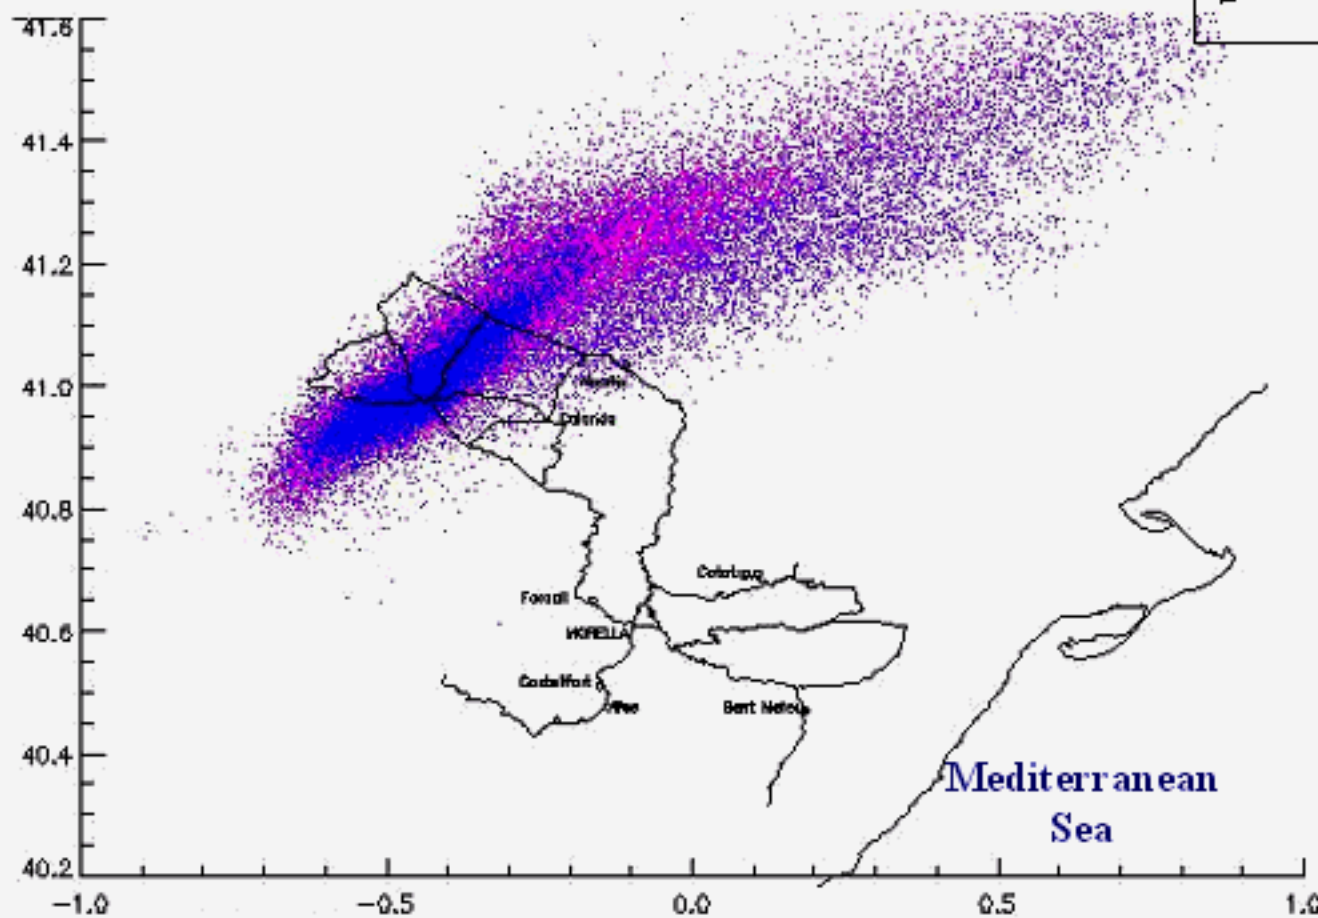

### SIMULTANEOUS MEASUREMENTS

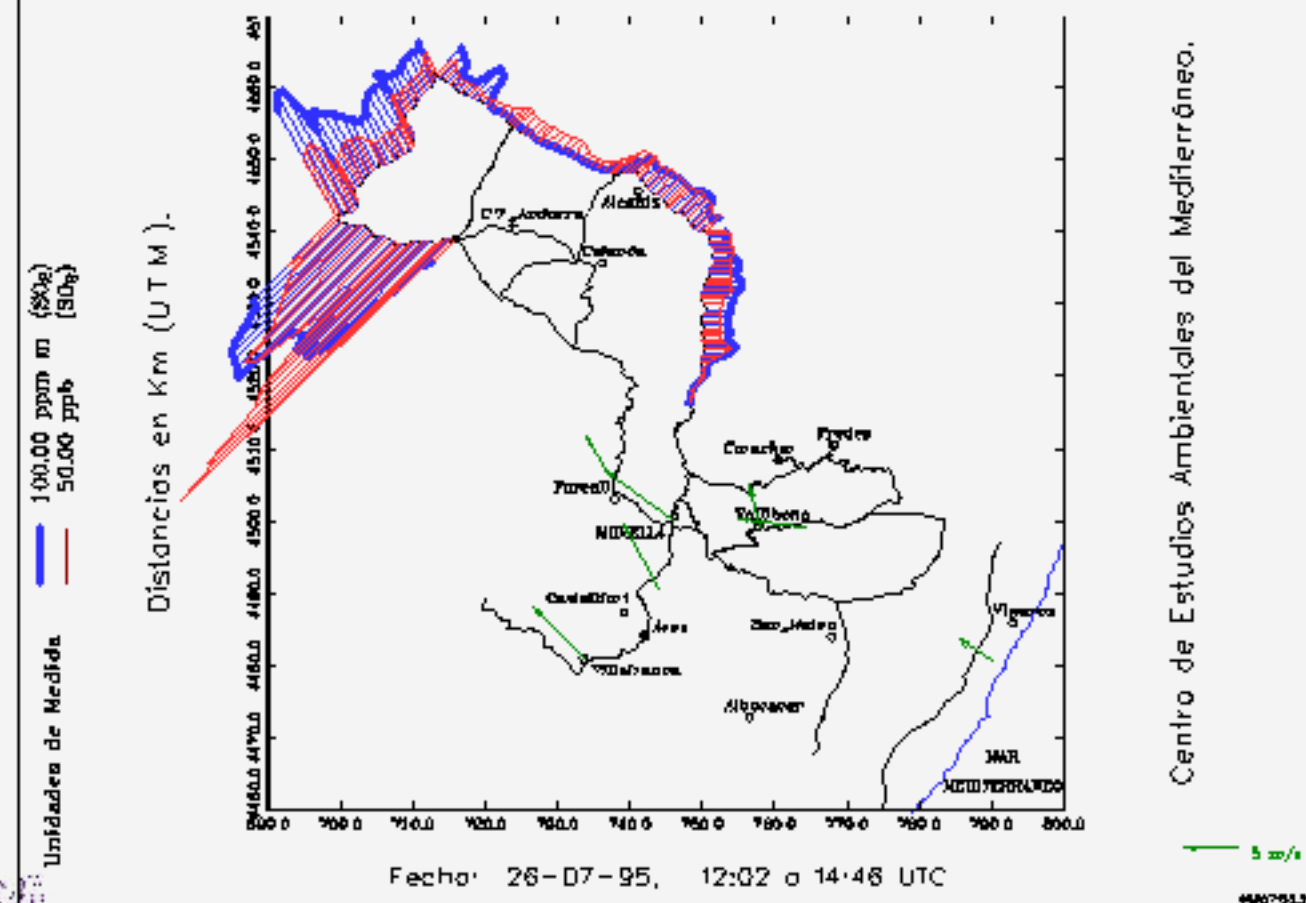

- Concentration aloft
- Ground-level Concentration
- ➔ 10 m.a.g.l. Wind Vector

- Particles between 0 and 2 h since emission
- Particles between 2 and 4 h since emission
- Particles between 4 and 6 h since emission





**DAY 26/07/95**

**18:00 UTC**

### LPDM SIMULTIONS

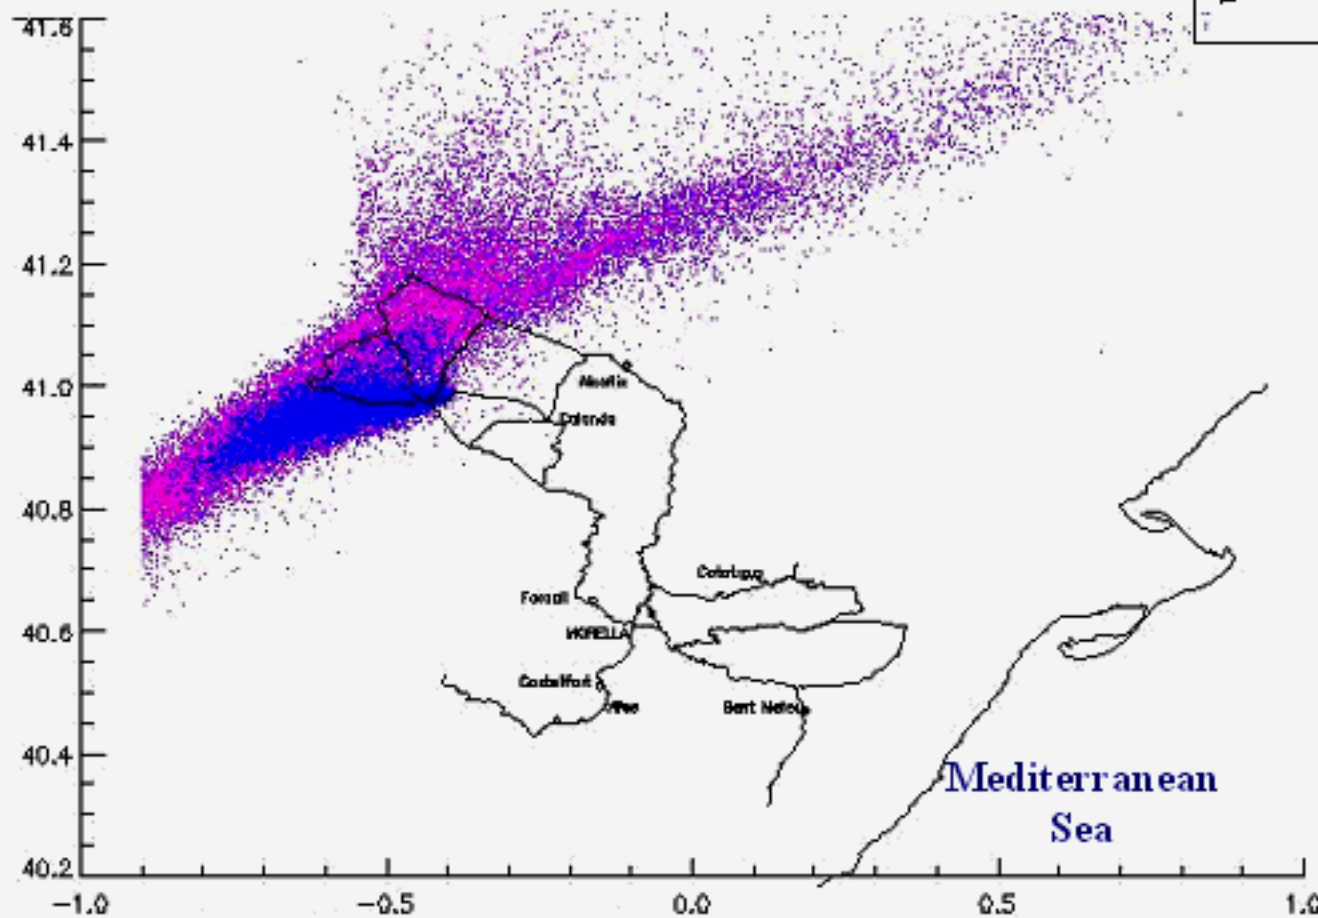

### SIMULTANEOUS MEASUREMENTS

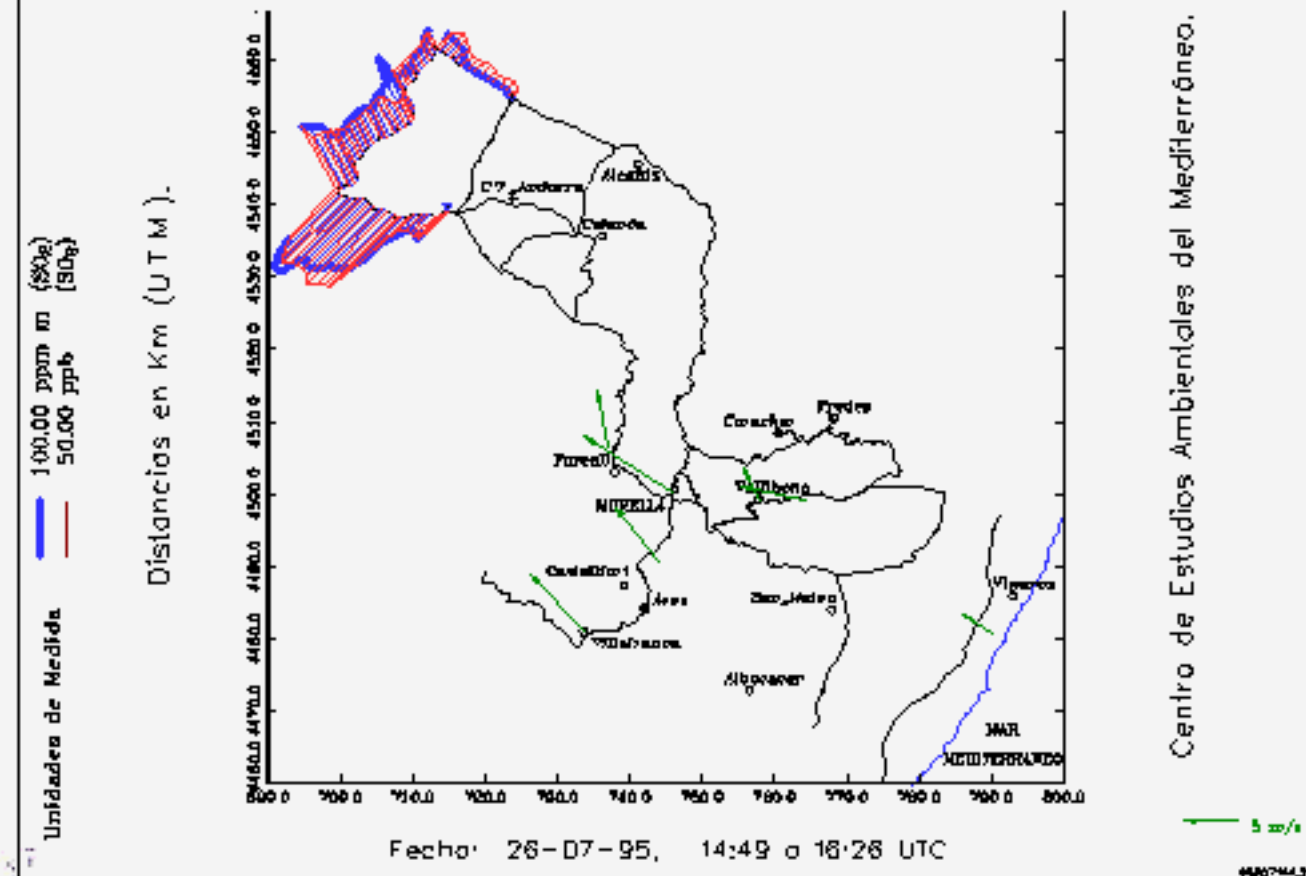

- Concentration aloft
- Ground-level Concentration
- ➔ 10 m.a.g.l. Wind Vector

- Particles between 0 and 2 h since emission
- Particles between 2 and 4 h since emission
- Particles between 4 and 6 h since emission

**DAY 26/07/95**

**19:00 UTC**

### LPDM SIMULTIONS

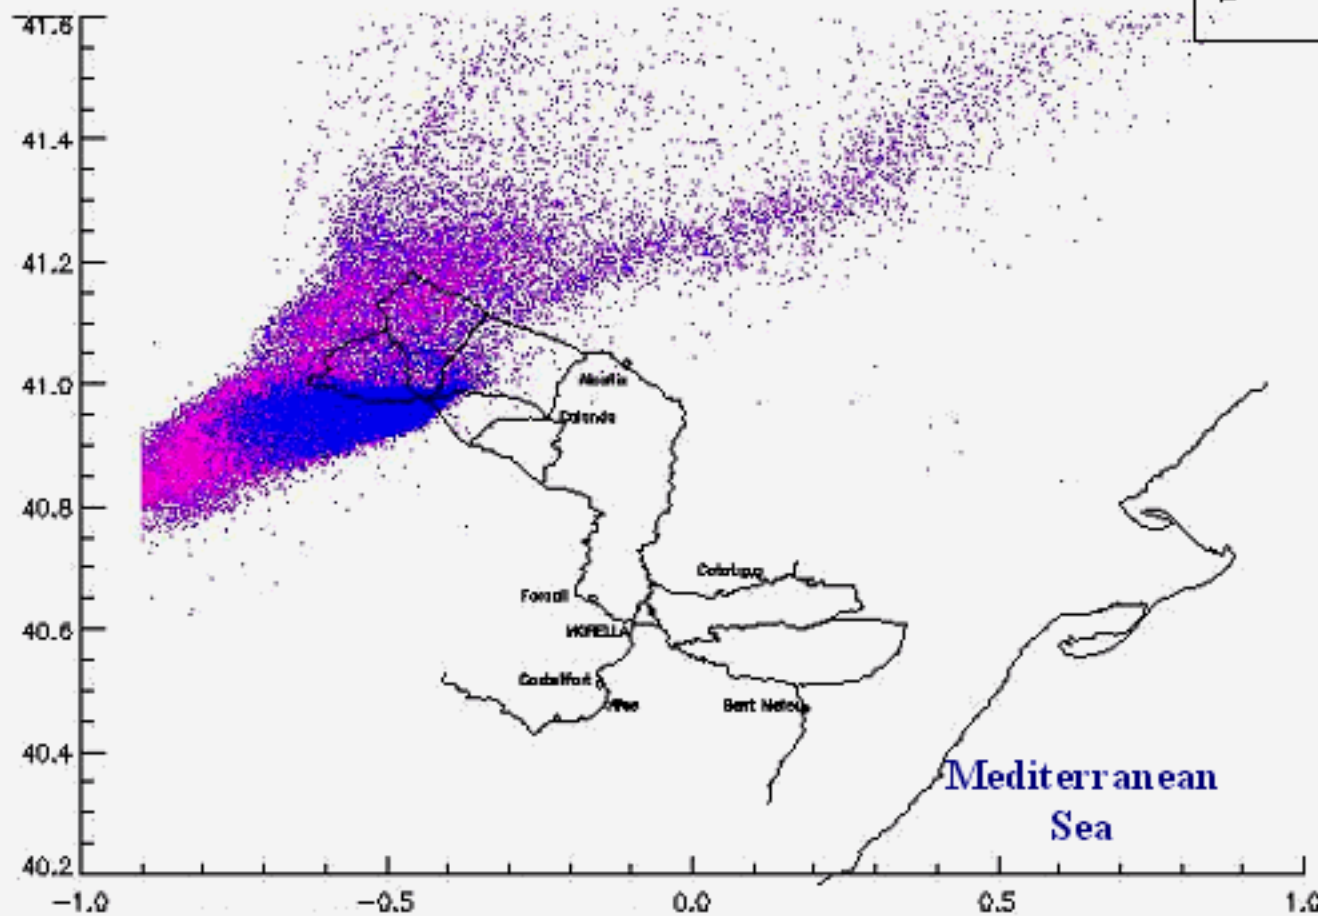

### SIMULTANEOUS MEASUREMENTS

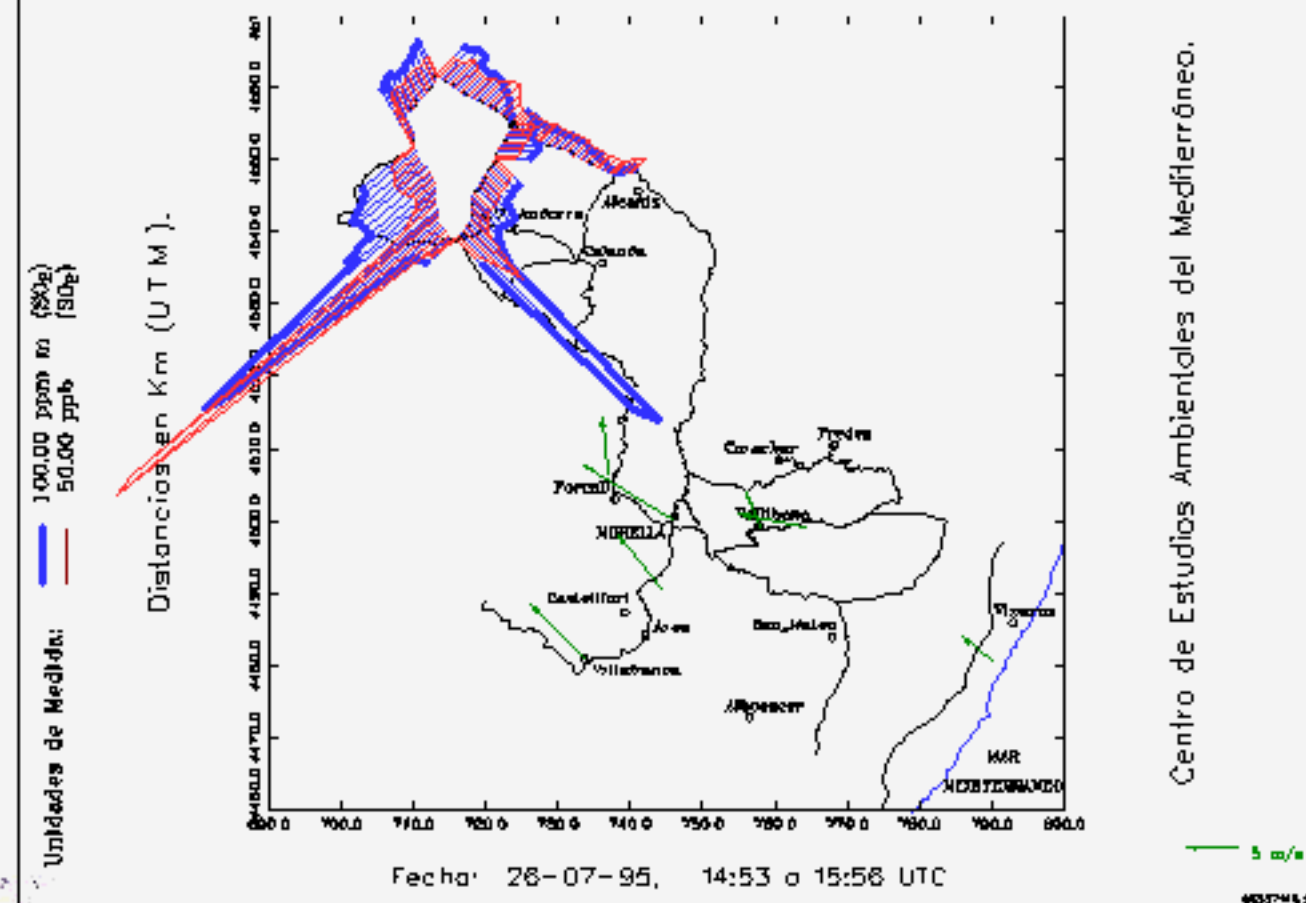

- Concentration aloft
- Ground-level Concentration
- ➔ 10 m.a.g.l. Wind Vector

- Particles between 0 and 2 h since emission
- Particles between 2 and 4 h since emission
- Particles between 4 and 6 h since emission



**DAY 26/07/95**

**20:00 UTC**

### LPDM SIMULTIONS

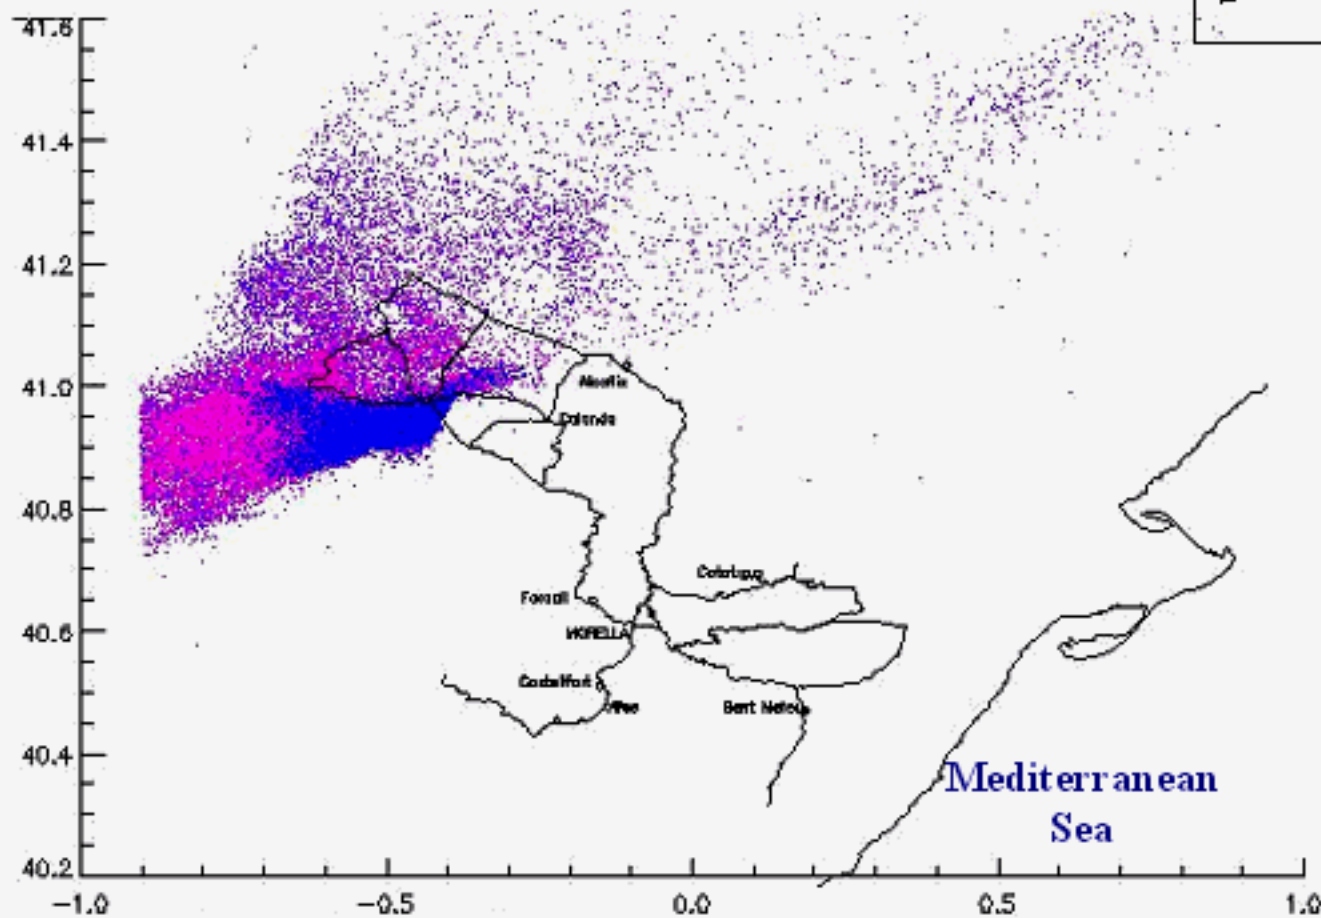

### SIMULTANEOUS MEASUREMENTS

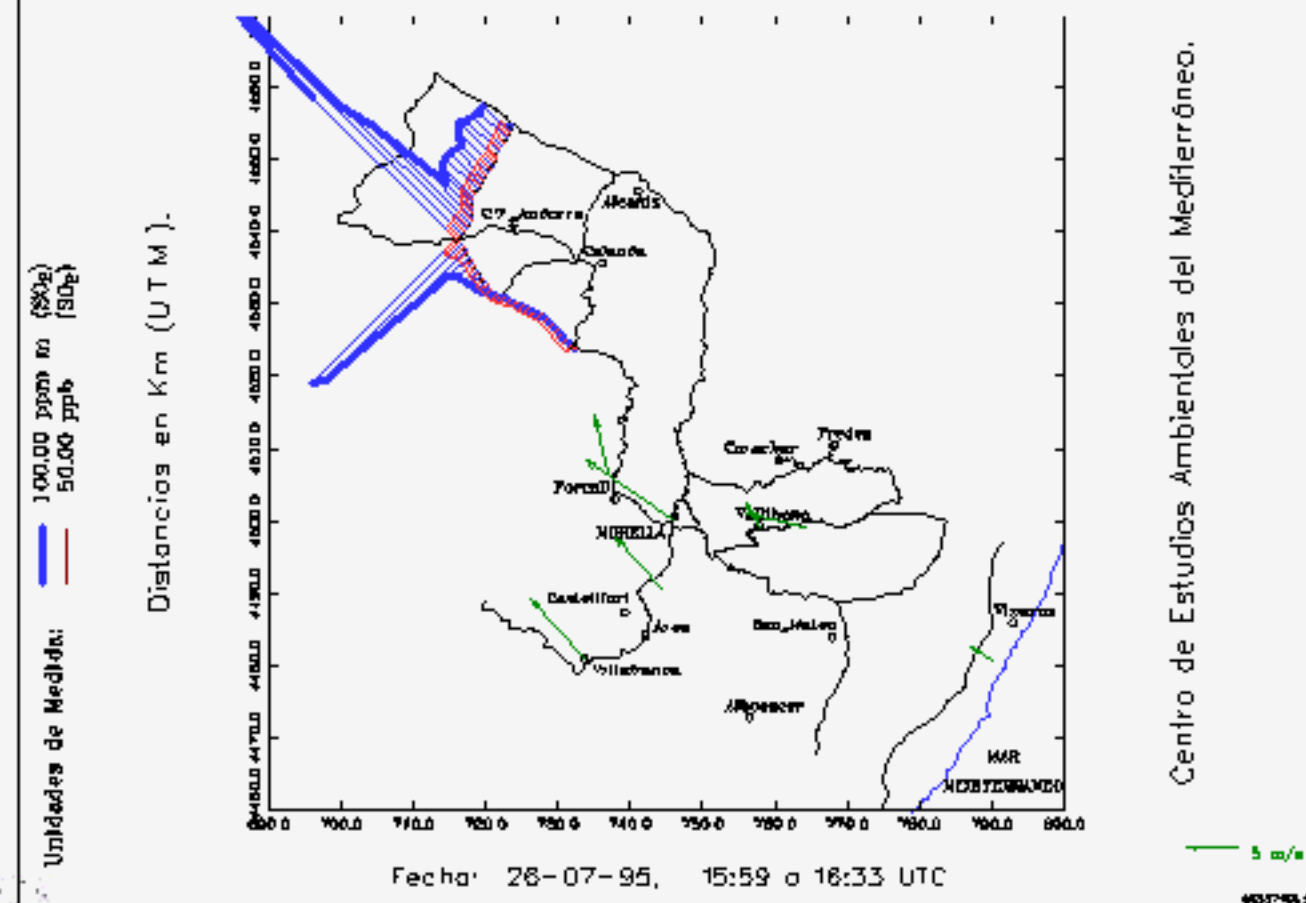

- Concentration aloft
- Ground-level Concentration
- ➔ 10 m.a.g.l. Wind Vector

- Particles between 0 and 2 h since emission
- Particles between 2 and 4 h since emission
- Particles between 4 and 6 h since emission

**DAY 26/07/95**

**21:00 UTC**

**LPDM SIMULTIONS**

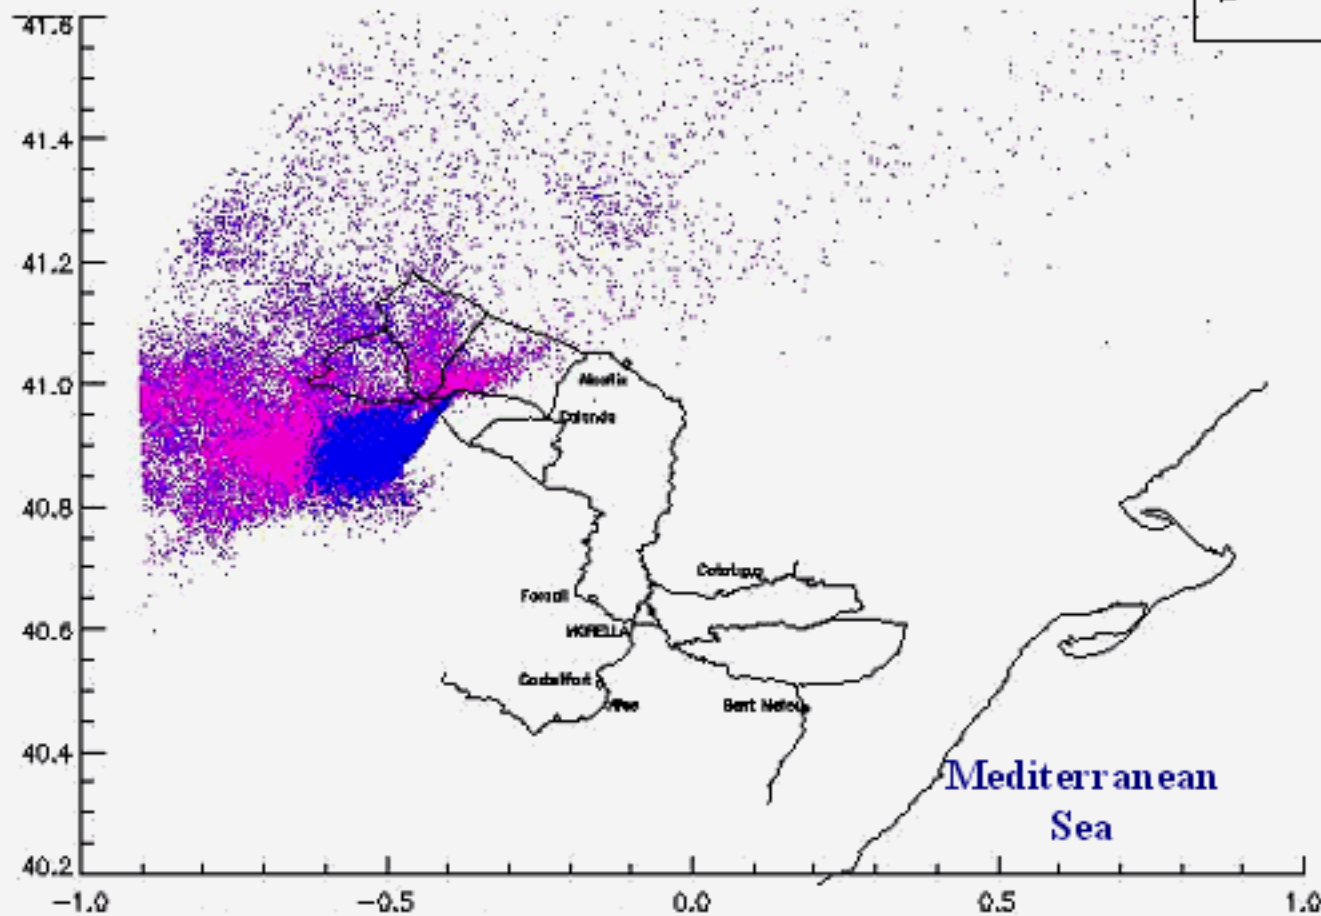

**SIMULTANEOUS MEASUREMENTS**

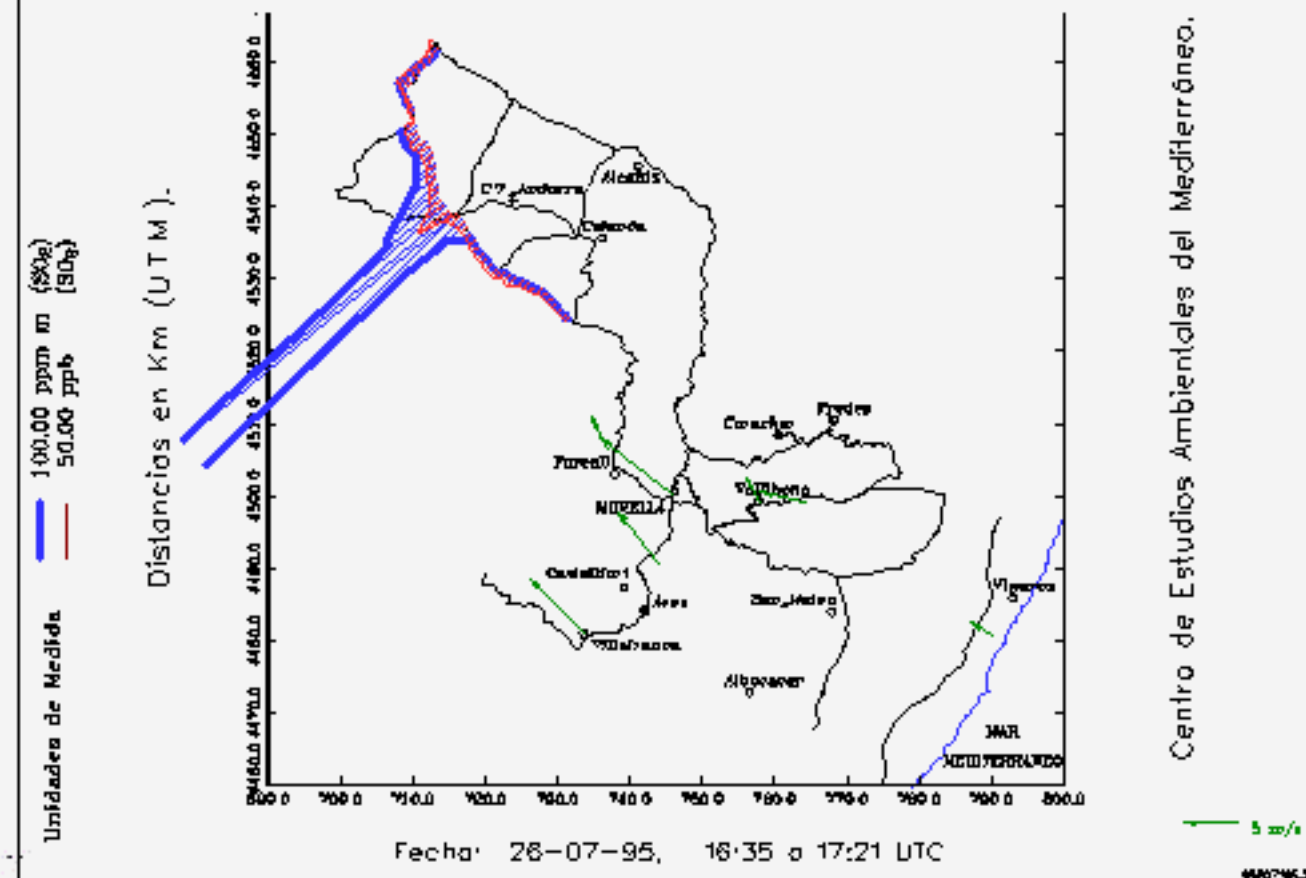

- **Concentration aloft**
- **Ground-level Concentration**
- ➔ **10 m.a.g.l. Wind Vector**

- **Particles between 0 and 2 h since emission**
- **Particles between 2 and 4 h since emission**
- **Particles between 4 and 6 h since emission**

**DAY 26/07/95**

**22:00 UTC**

LPDM SIMULTIONS

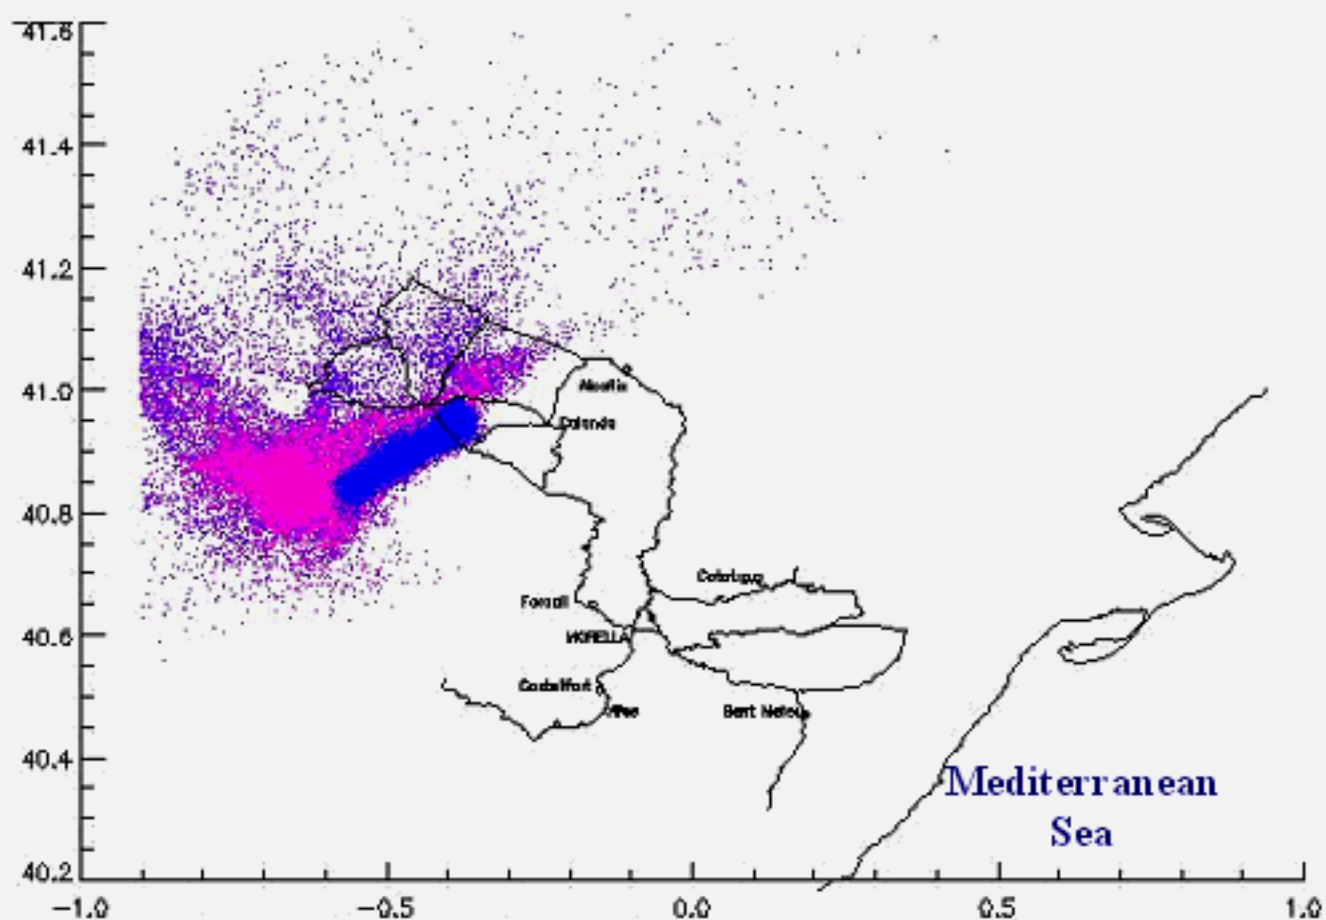

- Particles between 0 and 2 h since emission
- Particles between 2 and 4 h since emission
- Particles between 4 and 6 h since emission

**DAY 26/07/95**

**23:00 UTC**

LPDM SIMULTIONS

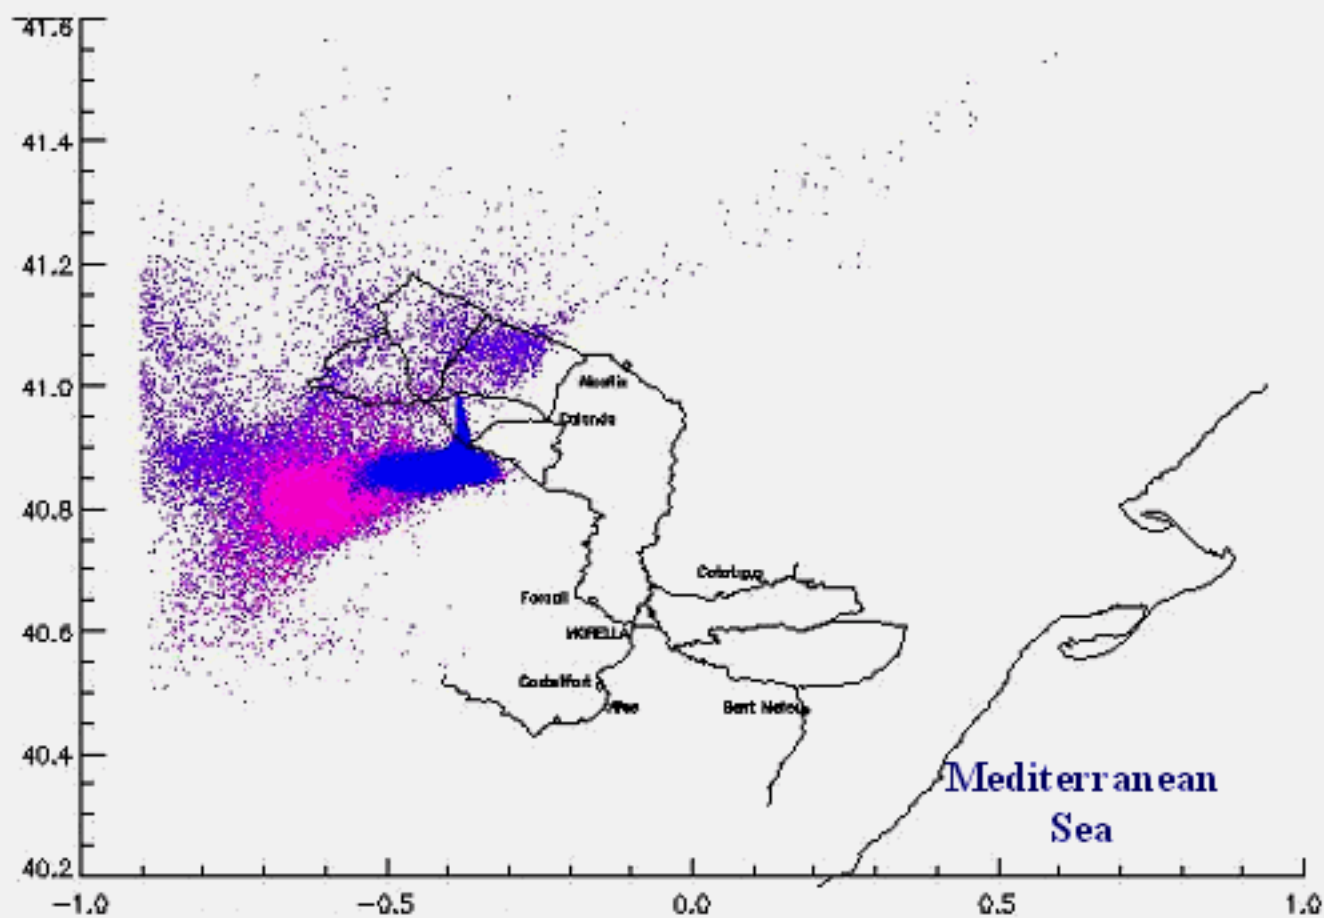

- Particles between 0 and 2 h since emission
- Particles between 2 and 4 h since emission
- Particles between 4 and 6 h since emission

**DAY 27/07/95**

**00:00 UTC**

LPDM SIMULTIONS

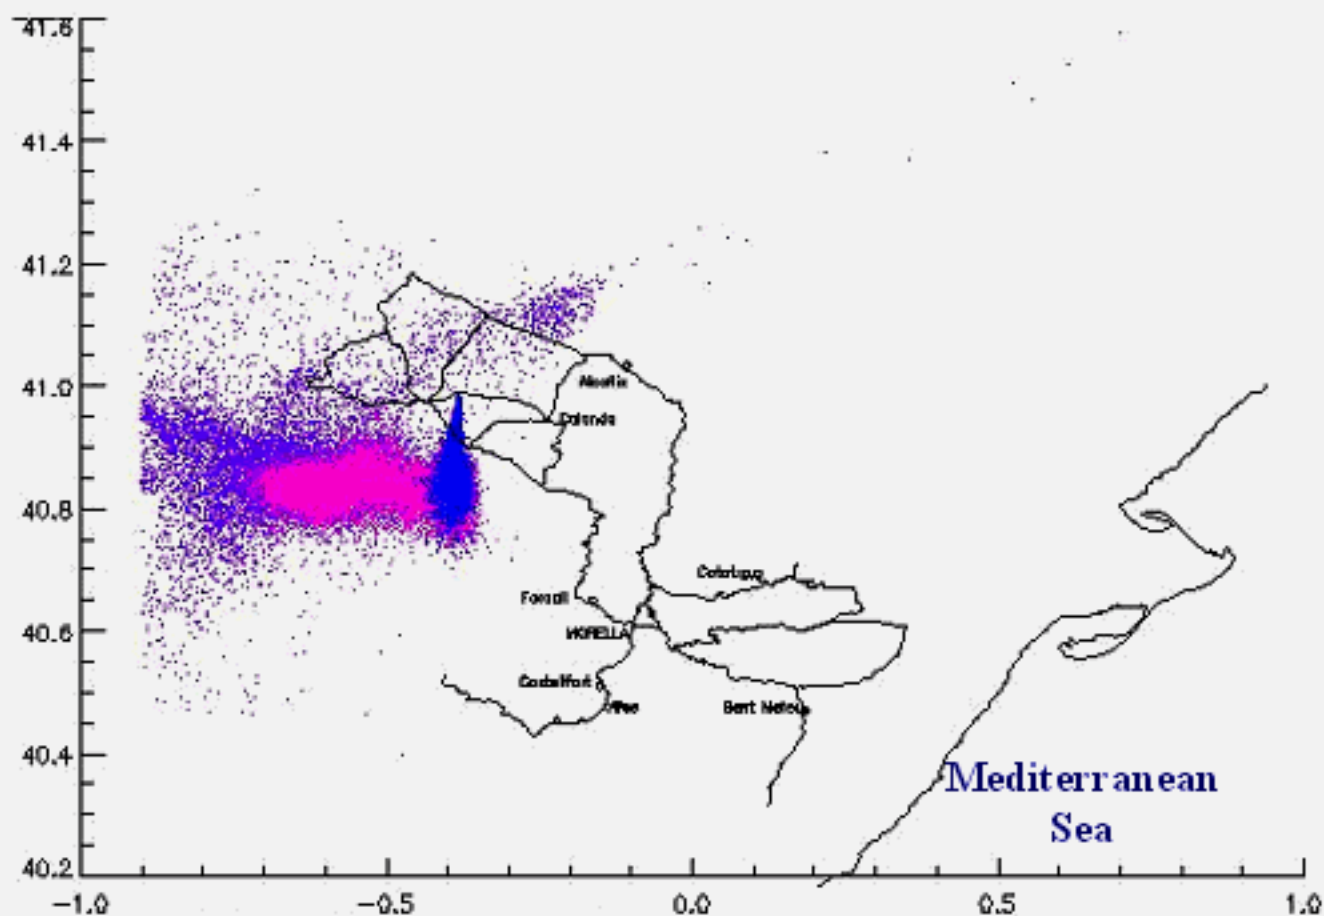

- Particles between 0 and 2 h since emission
- Particles between 2 and 4 h since emission
- Particles between 4 and 6 h since emission



**DAY 27/07/95**

**01:00 UTC**

LPDM SIMULTIONS

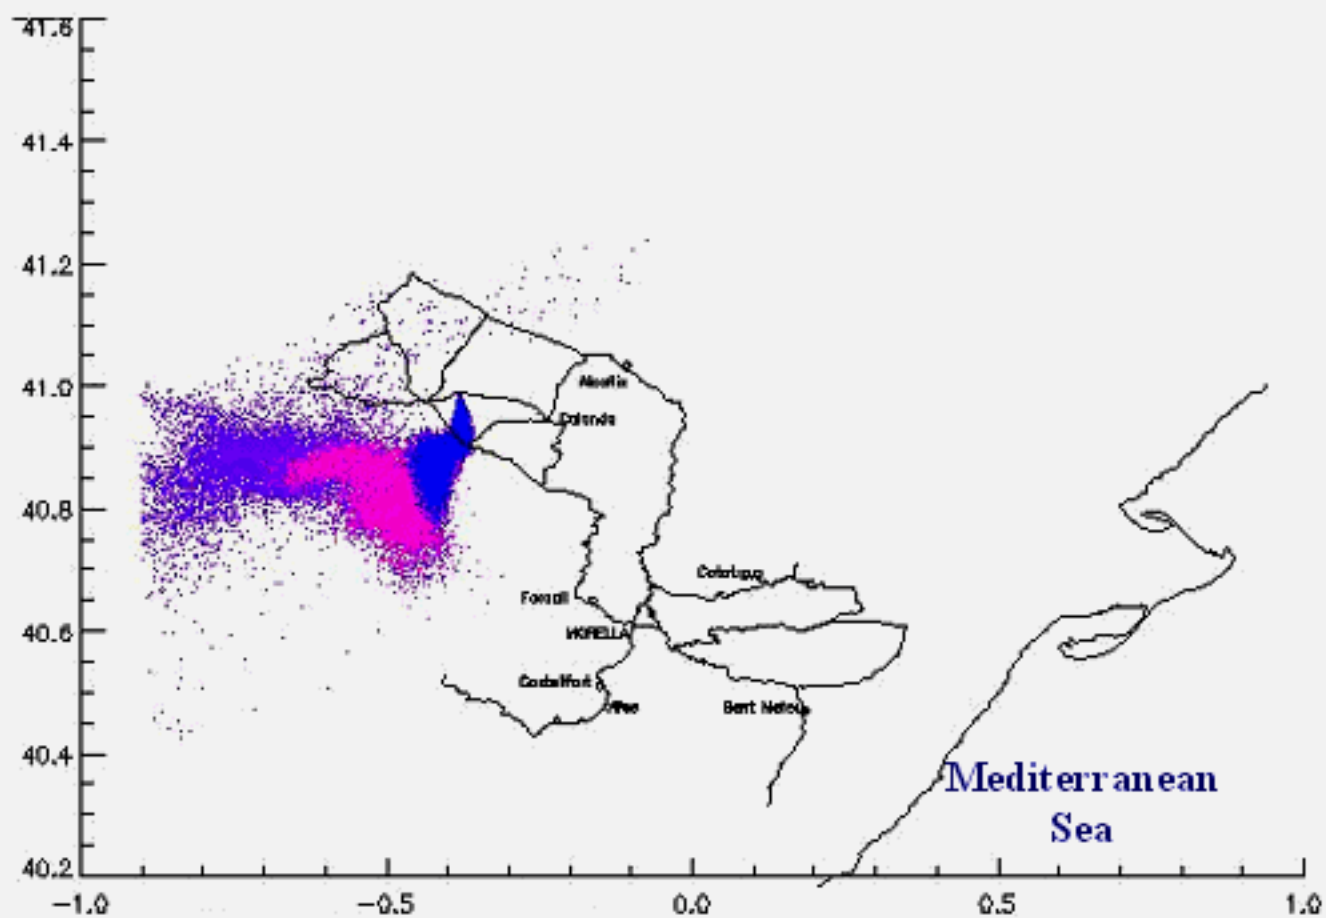

- Particles between 0 and 2 h since emission
- Particles between 2 and 4 h since emission
- Particles between 4 and 6 h since emission

**DAY 27/07/95**

**02:00 UTC**

LPDM SIMULTIONS

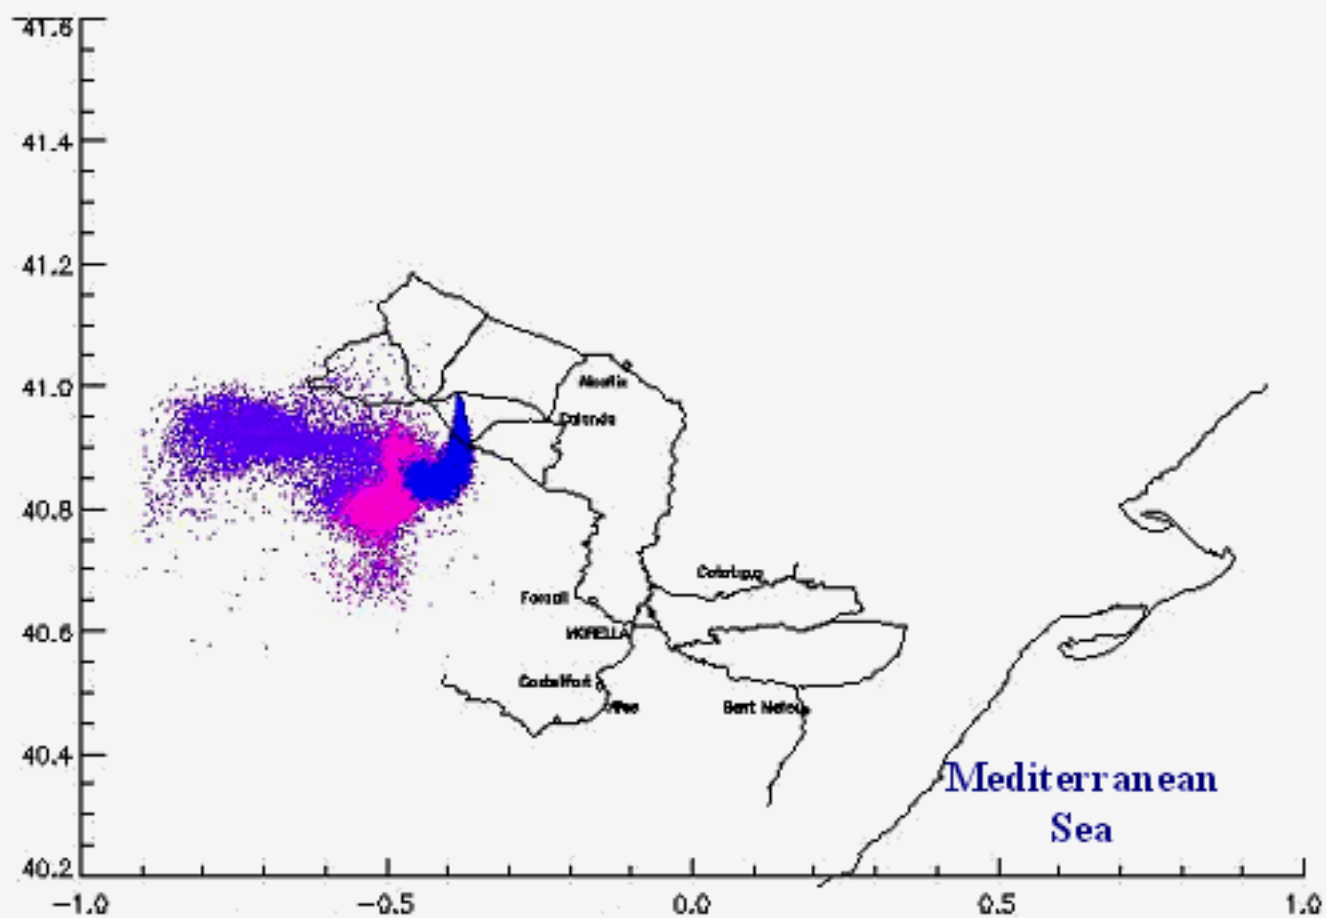

- Particles between 0 and 2 h since emission
- Particles between 2 and 4 h since emission
- Particles between 4 and 6 h since emission

**DAY 27/07/95**

**03:00 UTC**

LPDM SIMULTIONS

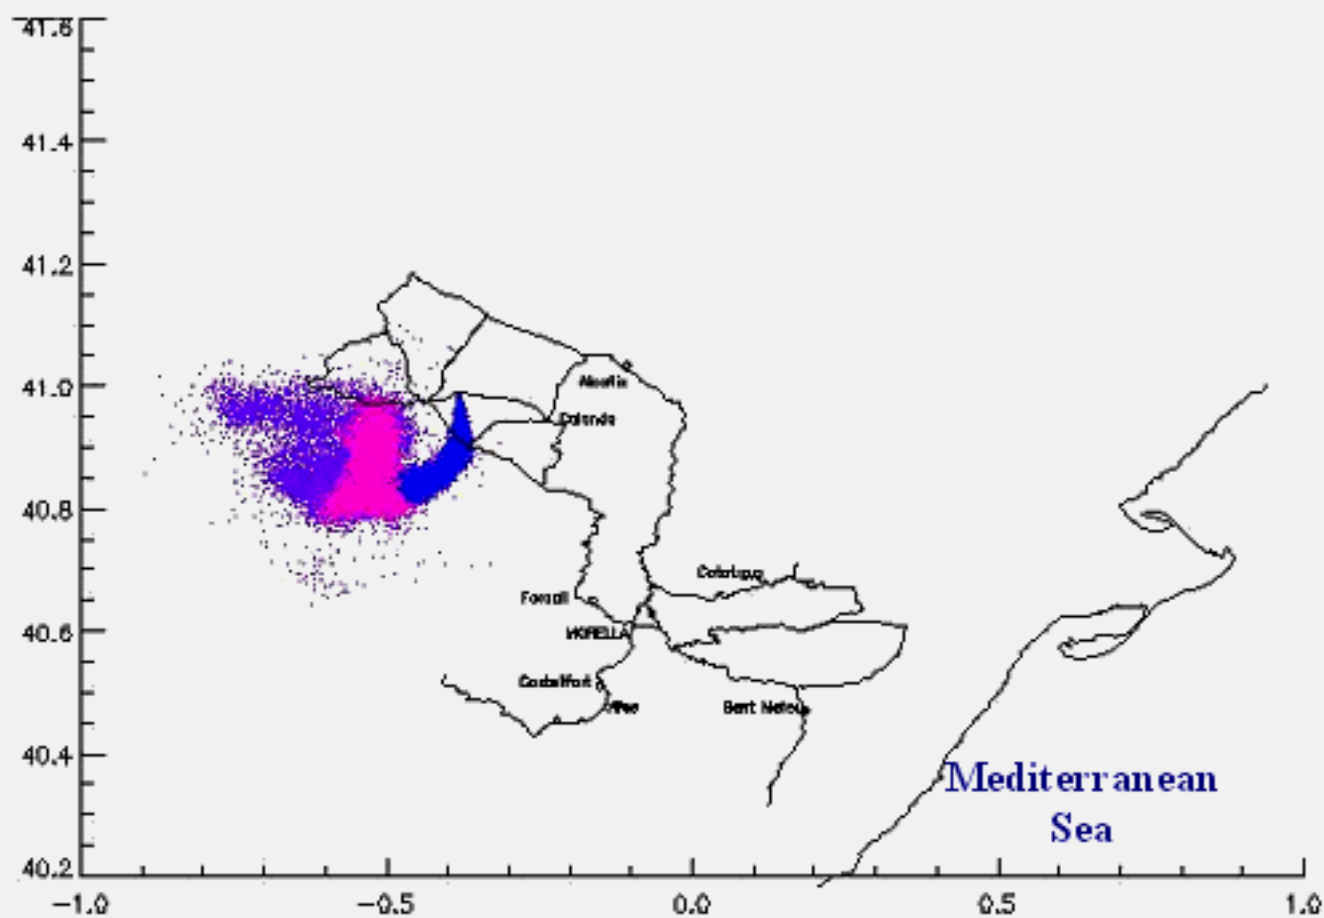

- Particles between 0 and 2 h since emission
- Particles between 2 and 4 h since emission
- Particles between 4 and 6 h since emission

**DAY 27/07/95**

**04:00 UTC**

LPDM SIMULTIONS

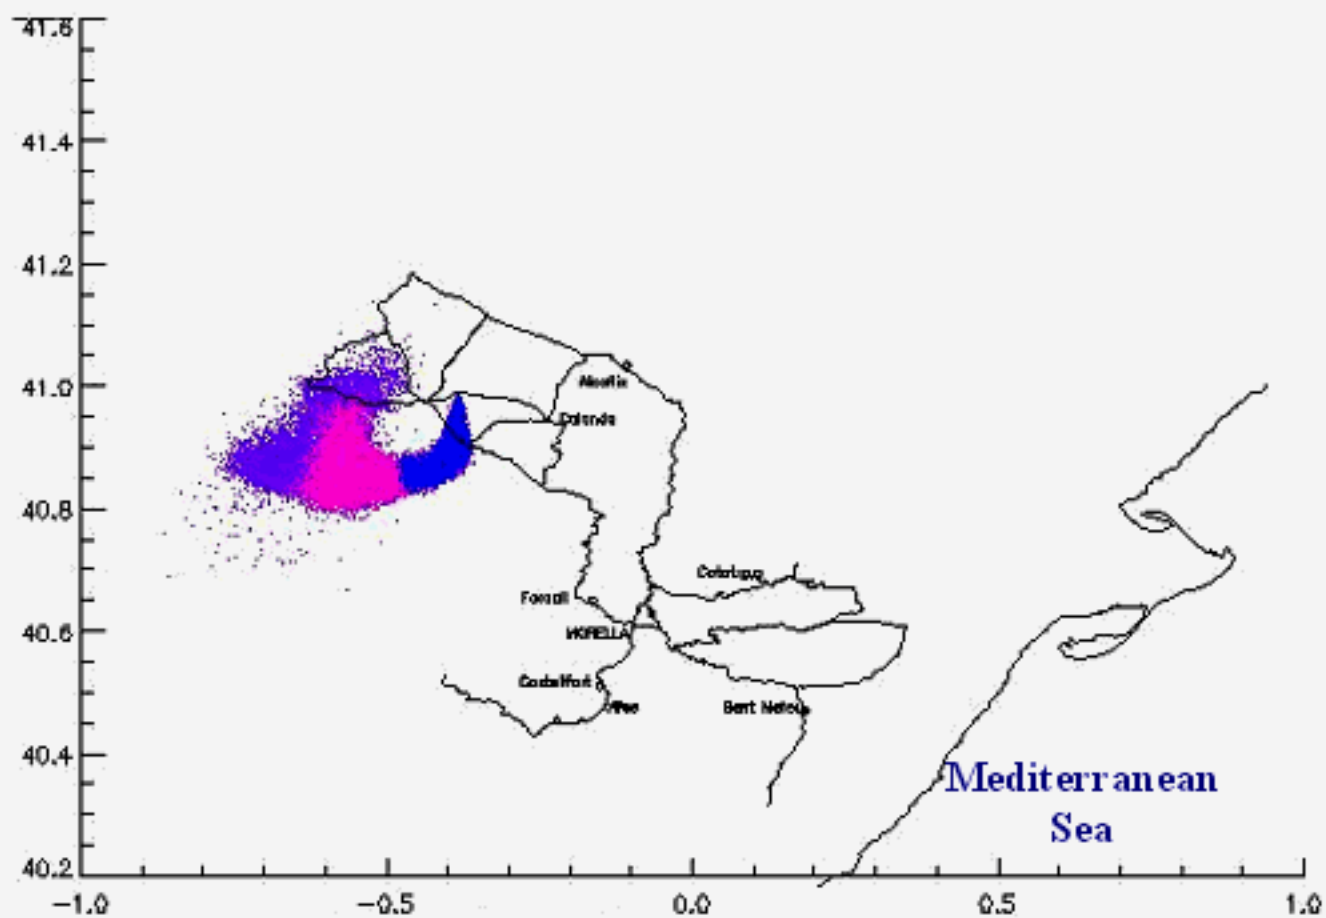

- Particles between 0 and 2 h since emission
- Particles between 2 and 4 h since emission
- Particles between 4 and 6 h since emission

**DAY 27/07/95**

**05:00 UTC**

LPDM SIMULTIONS

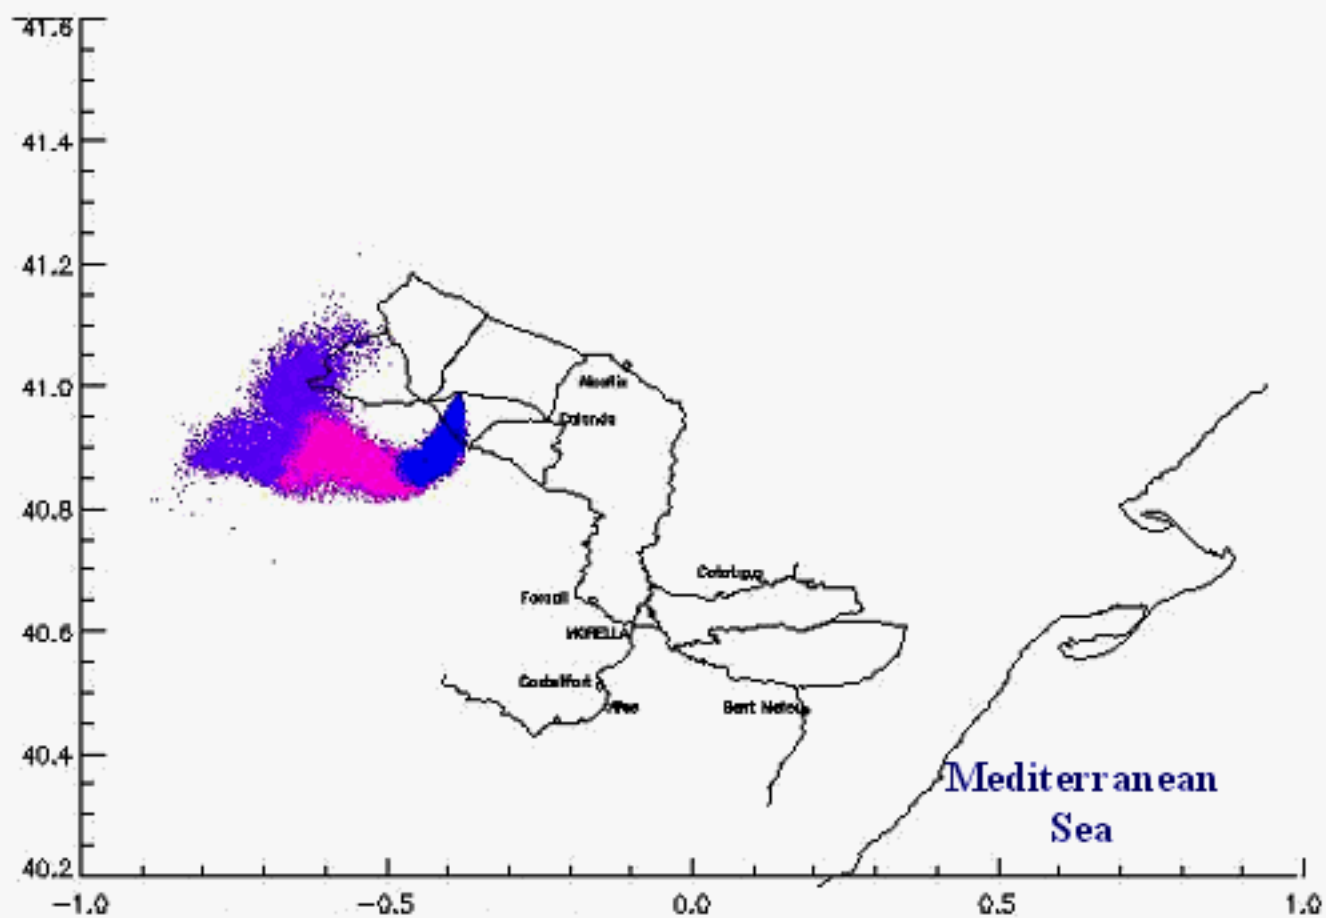

- Particles between 0 and 2 h since emission
- Particles between 2 and 4 h since emission
- Particles between 4 and 6 h since emission



**DAY 27/07/95**

**06:00 UTC**

LPDM SIMULTIONS

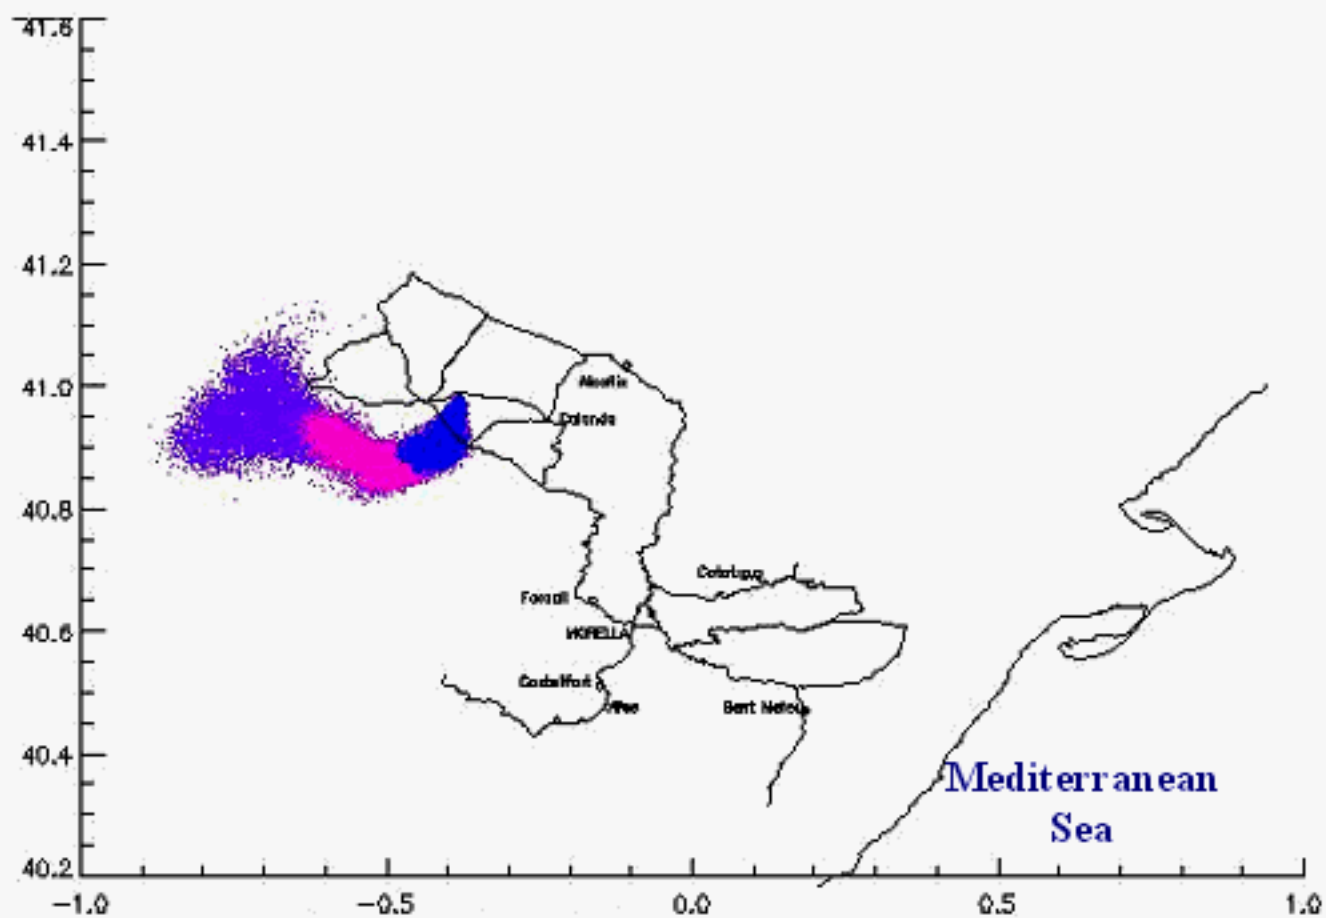

- Particles between 0 and 2 h since emission
- Particles between 2 and 4 h since emission
- Particles between 4 and 6 h since emission

**DAY 27/07/95**

**07:00 UTC**

LPDM SIMULTIONS

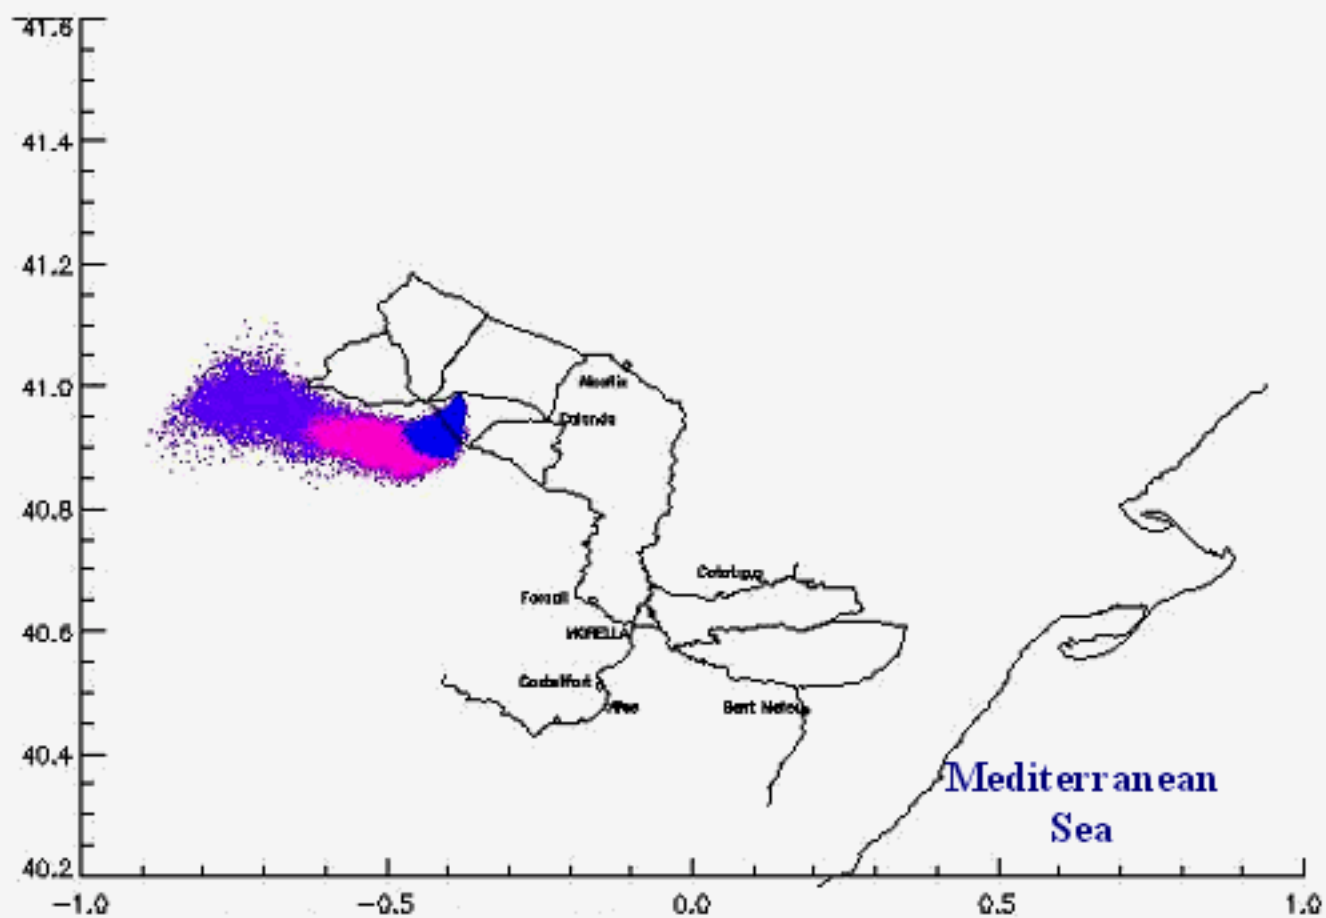

- Particles between 0 and 2 h since emission
- Particles between 2 and 4 h since emission
- Particles between 4 and 6 h since emission

**DAY 27/07/95**

**08:00 UTC**

LPDM SIMULTIONS

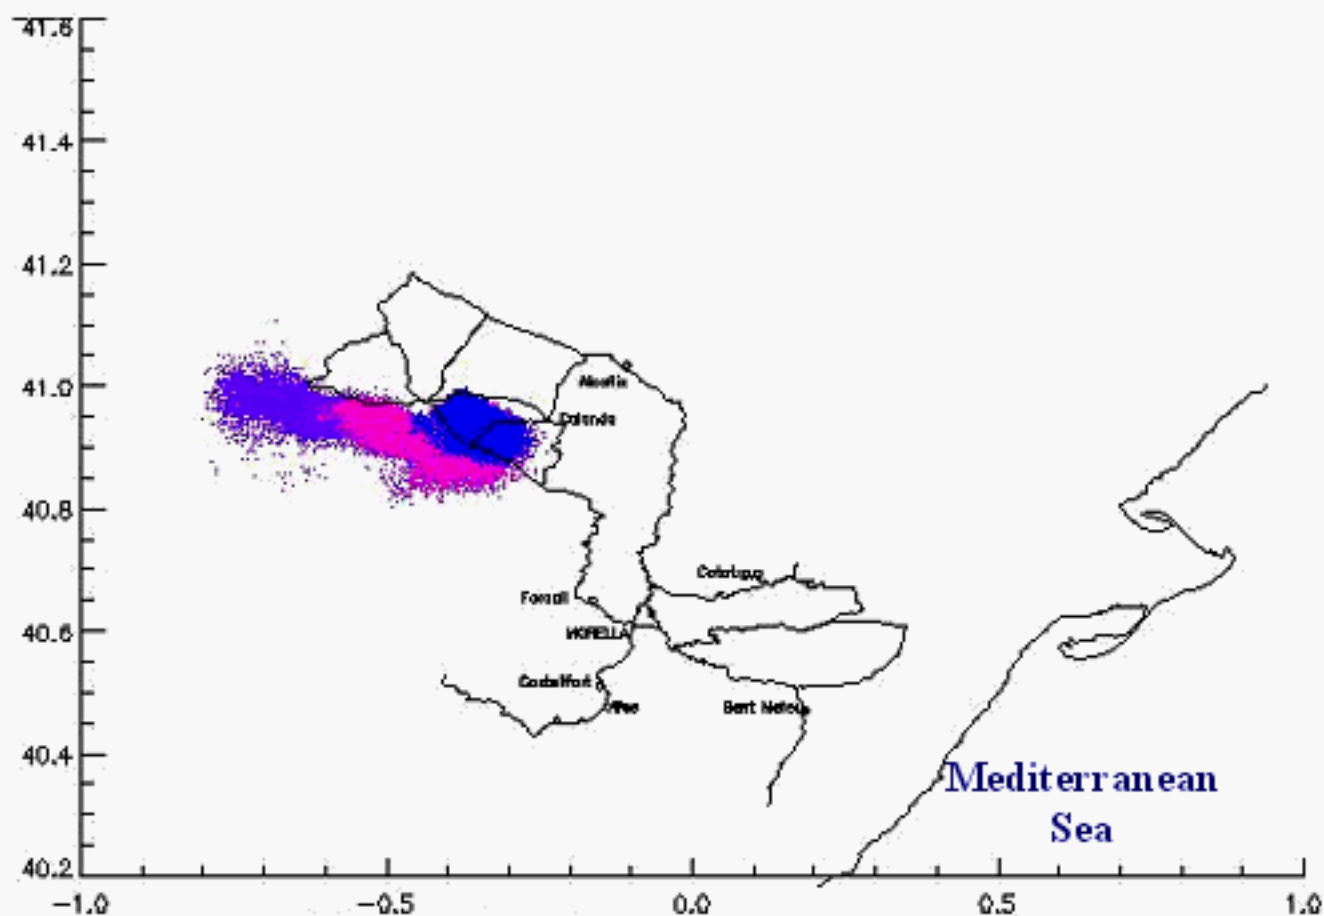

- Particles between 0 and 2 h since emission
- Particles between 2 and 4 h since emission
- Particles between 4 and 6 h since emission

**DAY 27/07/95**

**09:00 UTC**

**LPDM SIMULTIONS**

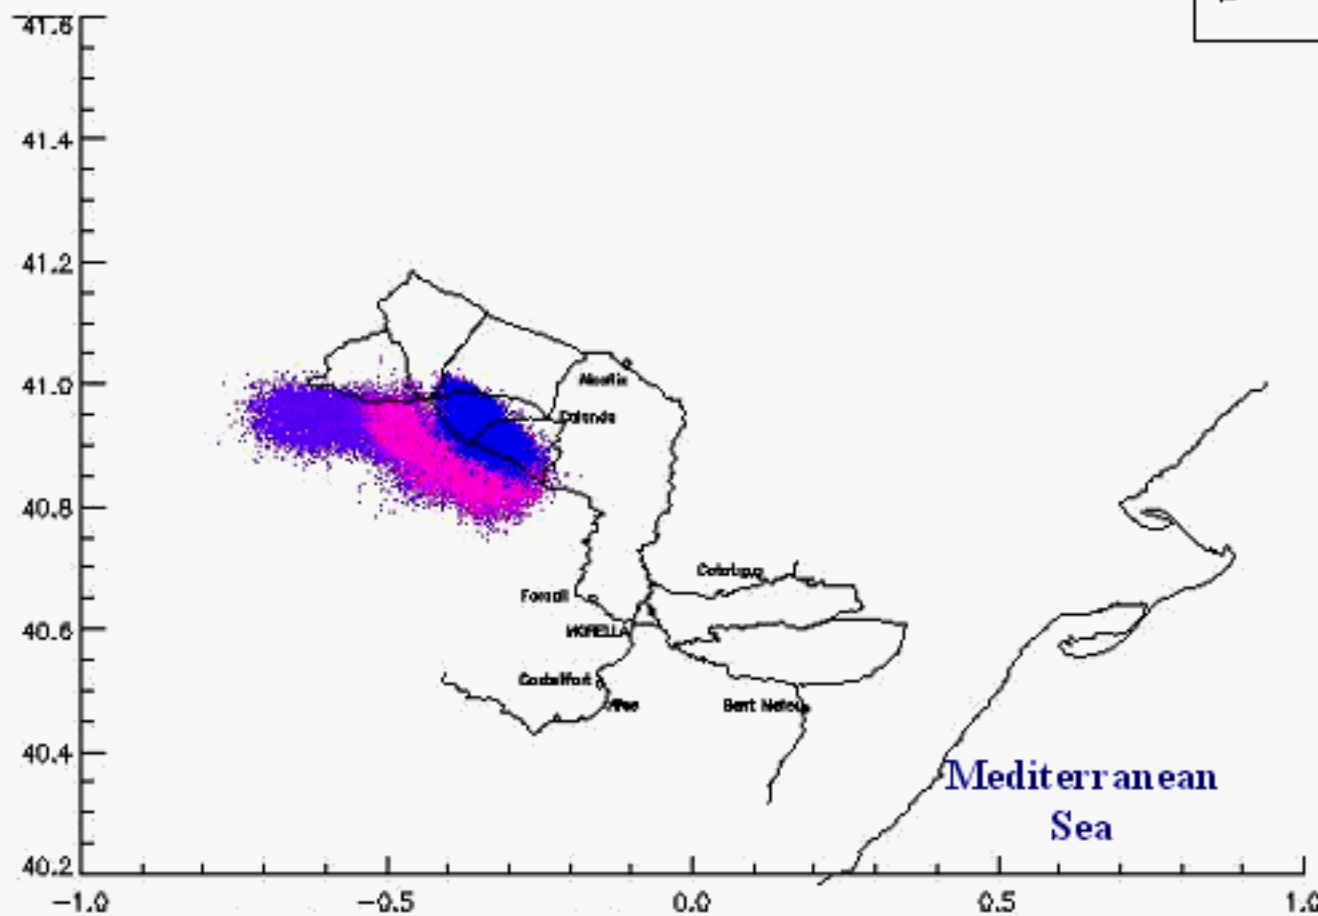

**SIMULTANEOUS MEASUREMENTS**

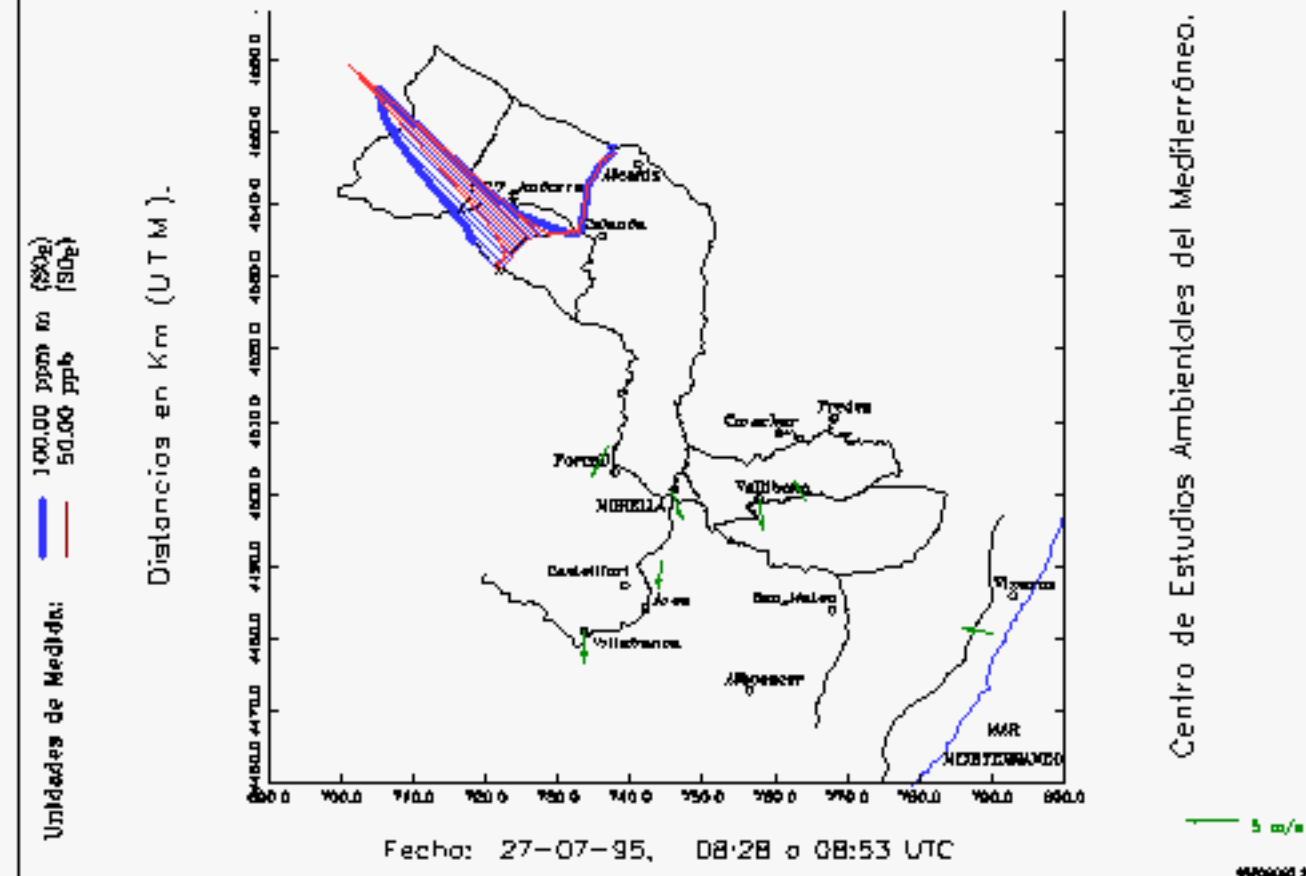

- **Concentration aloft**
- **Ground-level Concentration**
- ➔ **10 m.a.g.l. Wind Vector**

- **Particles between 0 and 2 h since emission**
- **Particles between 2 and 4 h since emission**
- **Particles between 4 and 6 h since emission**



**DAY 27/07/95**

**10:00 UTC**

**LPDM SIMULTIONS**

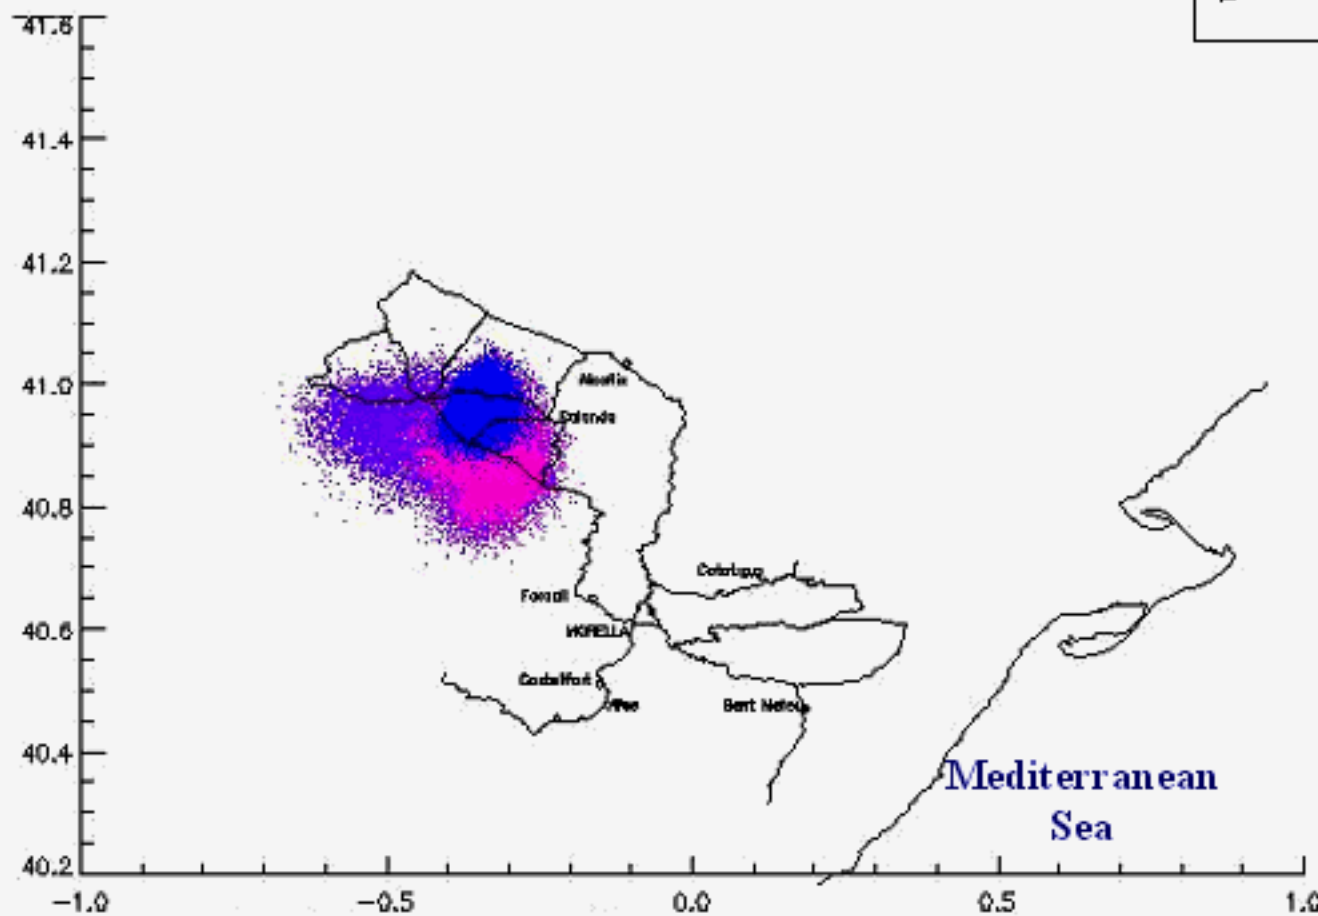

**SIMULTANEOUS MEASUREMENTS**

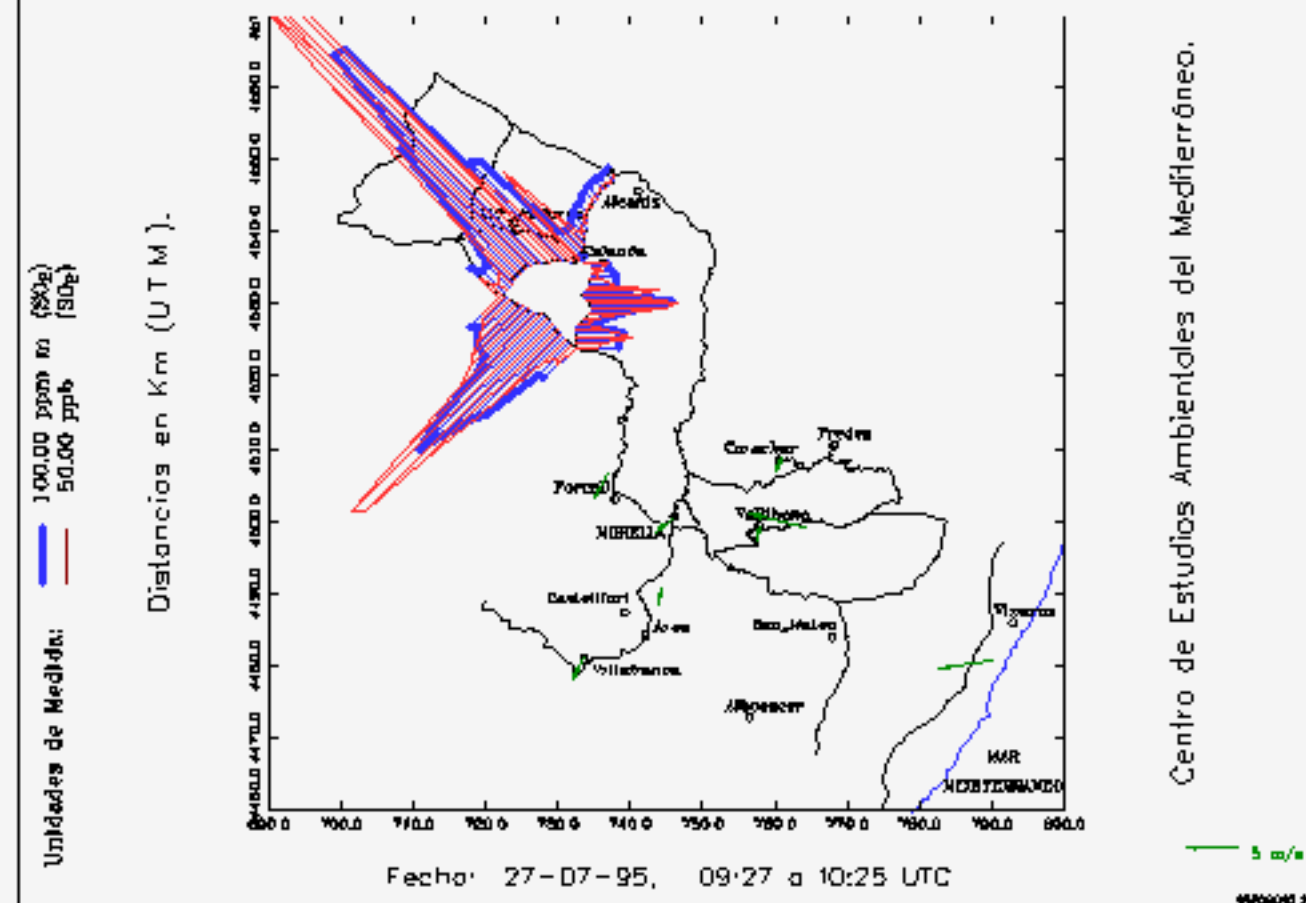

- **Concentration aloft**
- **Ground-level Concentration**
- ➔ **10 m.a.g.l. Wind Vector**

- **Particles between 0 and 2 h since emission**
- **Particles between 2 and 4 h since emission**
- **Particles between 4 and 6 h since emission**

# DAY 27/07/95

## 11:00 UTC

### LPDM SIMULTIONS

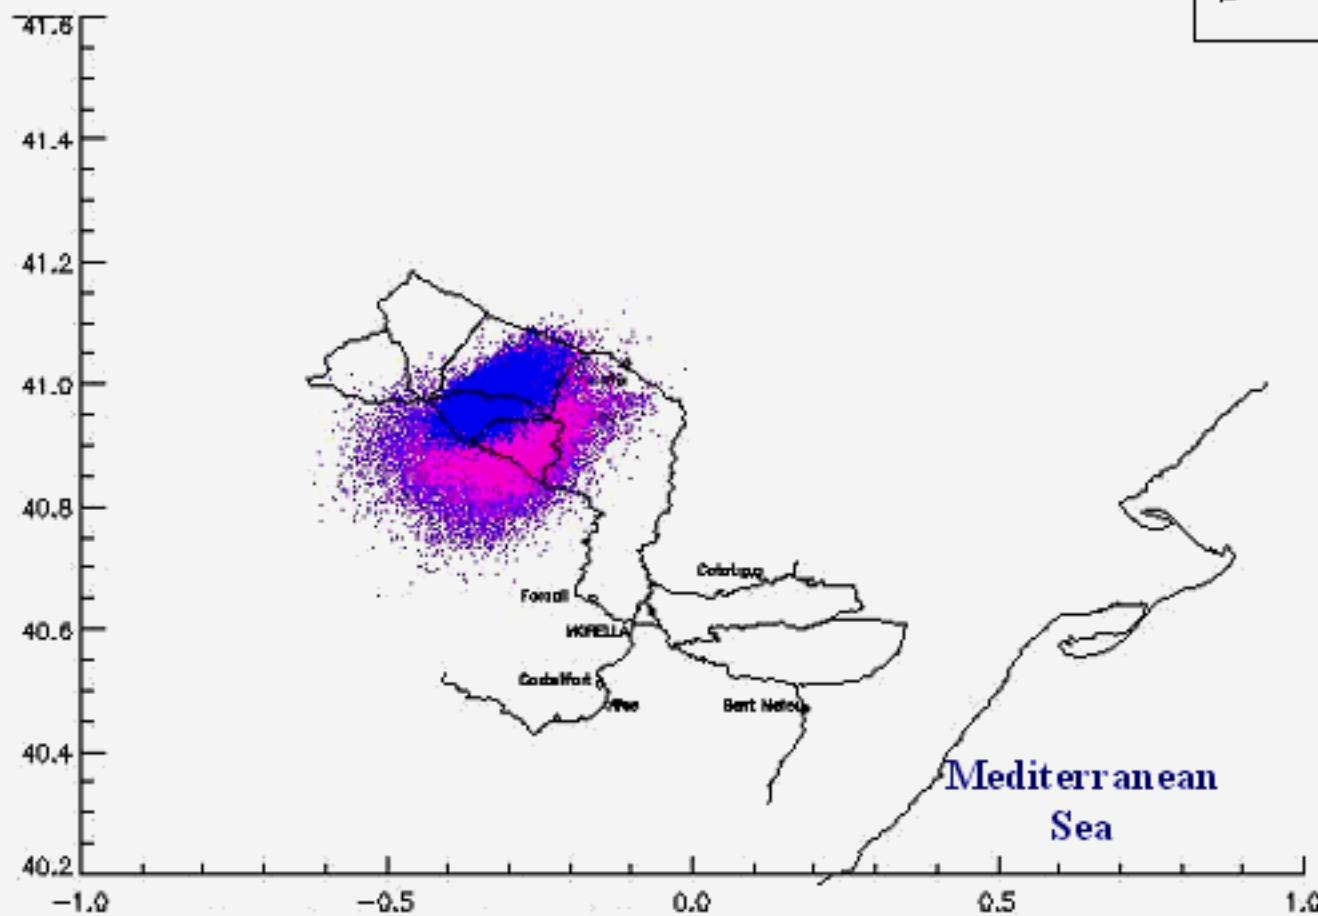

### SIMULTANEOUS MEASUREMENTS

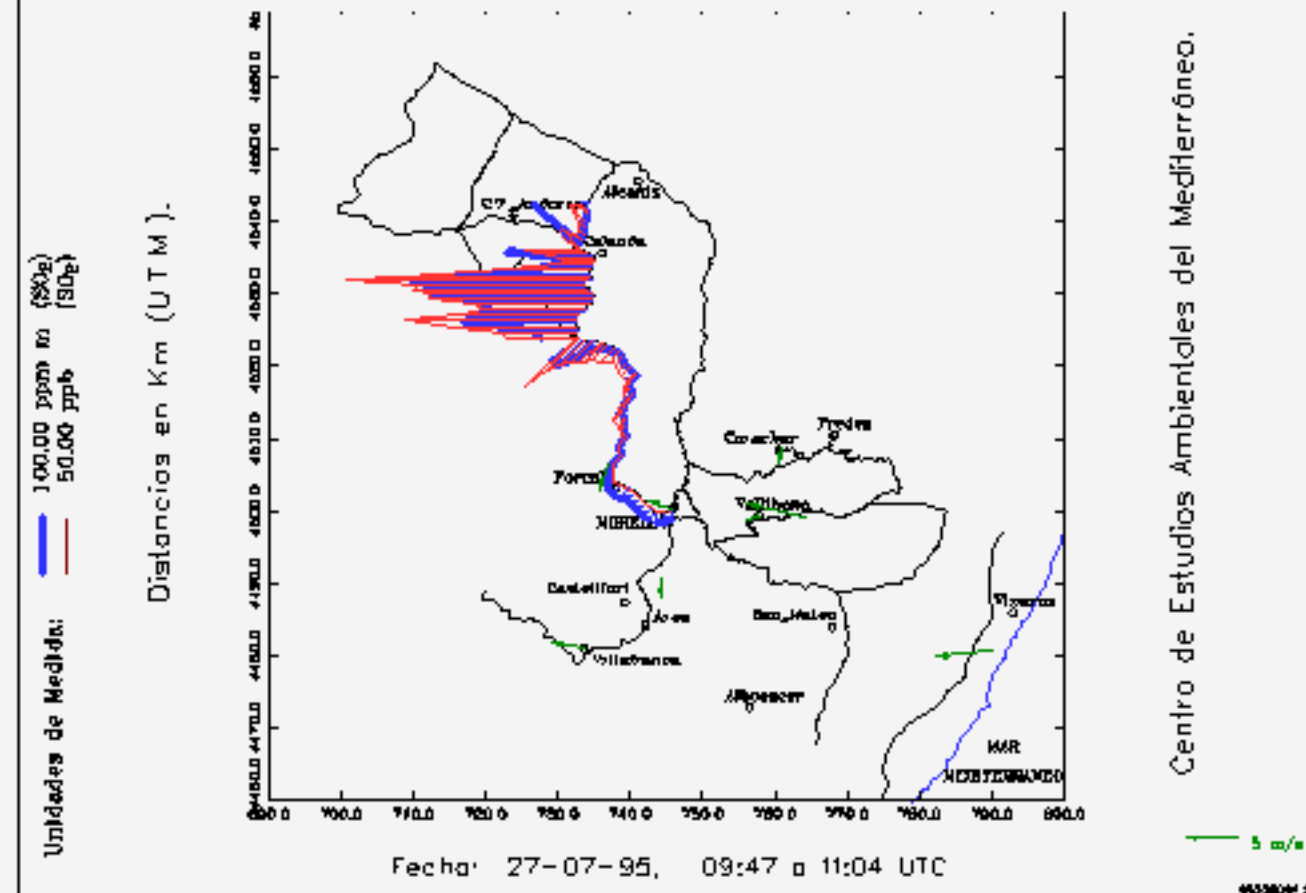

- Concentration aloft
- Ground-level Concentration
- ➔ 10 m.a.g.l. Wind Vector

- Particles between 0 and 2 h since emission
- Particles between 2 and 4 h since emission
- Particles between 4 and 6 h since emission

Centro de Estudios Ambientales del Mediterráneo.

**DAY 27/07/95**

**12:00 UTC**

LPDM SIMULTIONS

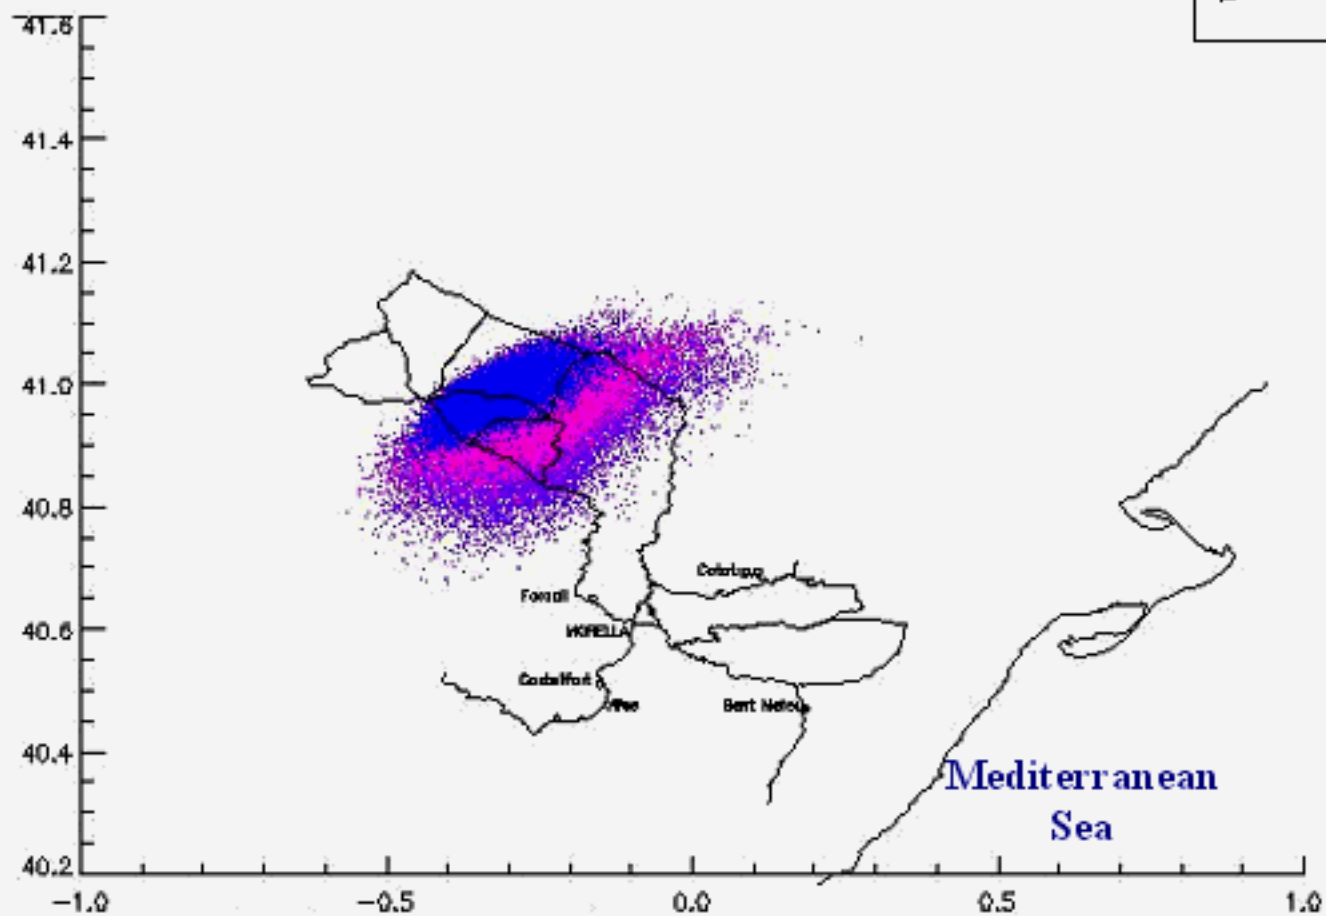

**SIMULTANEOUS MEASUREMENTS**

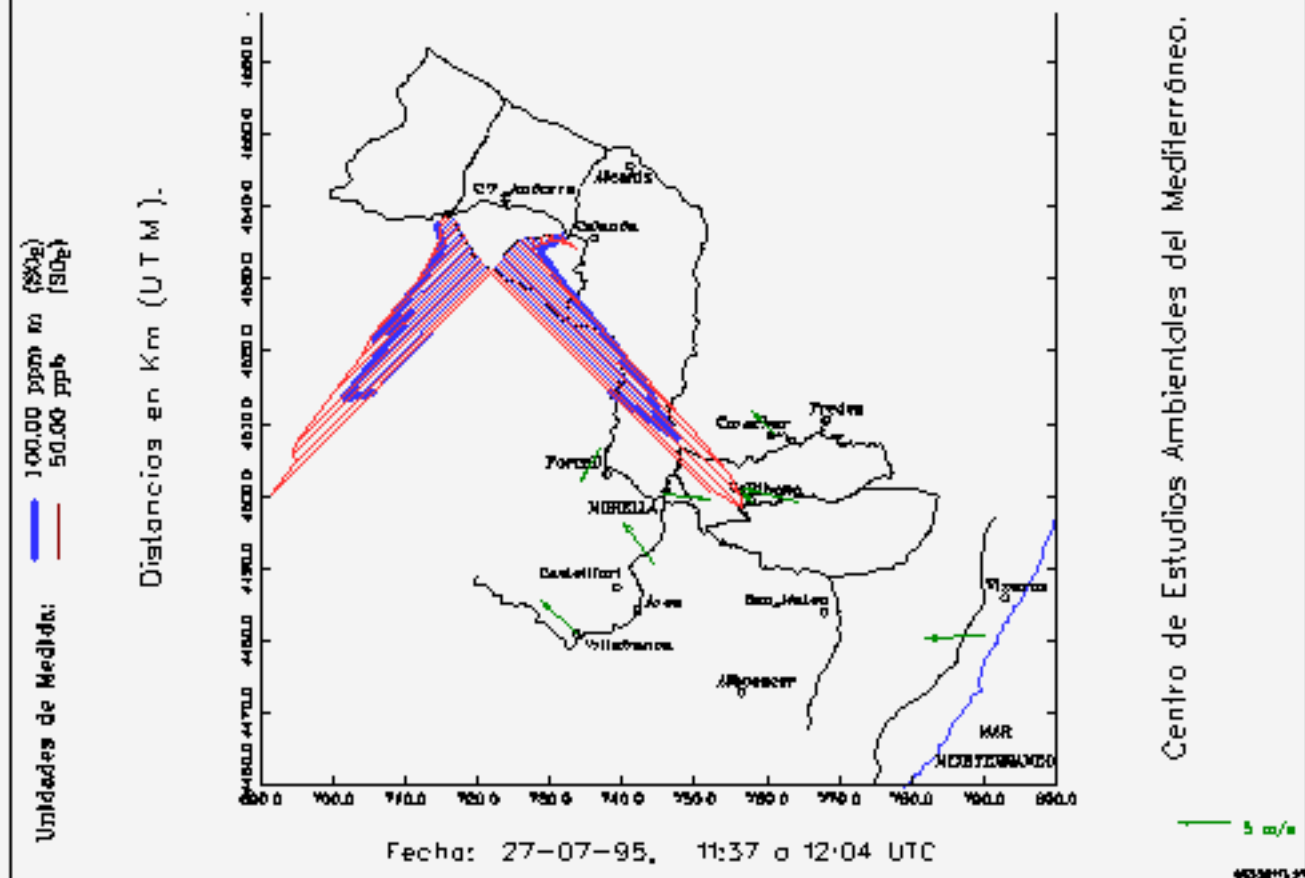

- **Concentration aloft**
- **Ground-level Concentration**
- ➔ **10 m.a.g.l. Wind Vector**

- **Particles between 0 and 2 h since emission**
- **Particles between 2 and 4 h since emission**
- **Particles between 4 and 6 h since emission**



**DAY 27/07/95**

**14:00 UTC**

**LPDM SIMULTIONS**

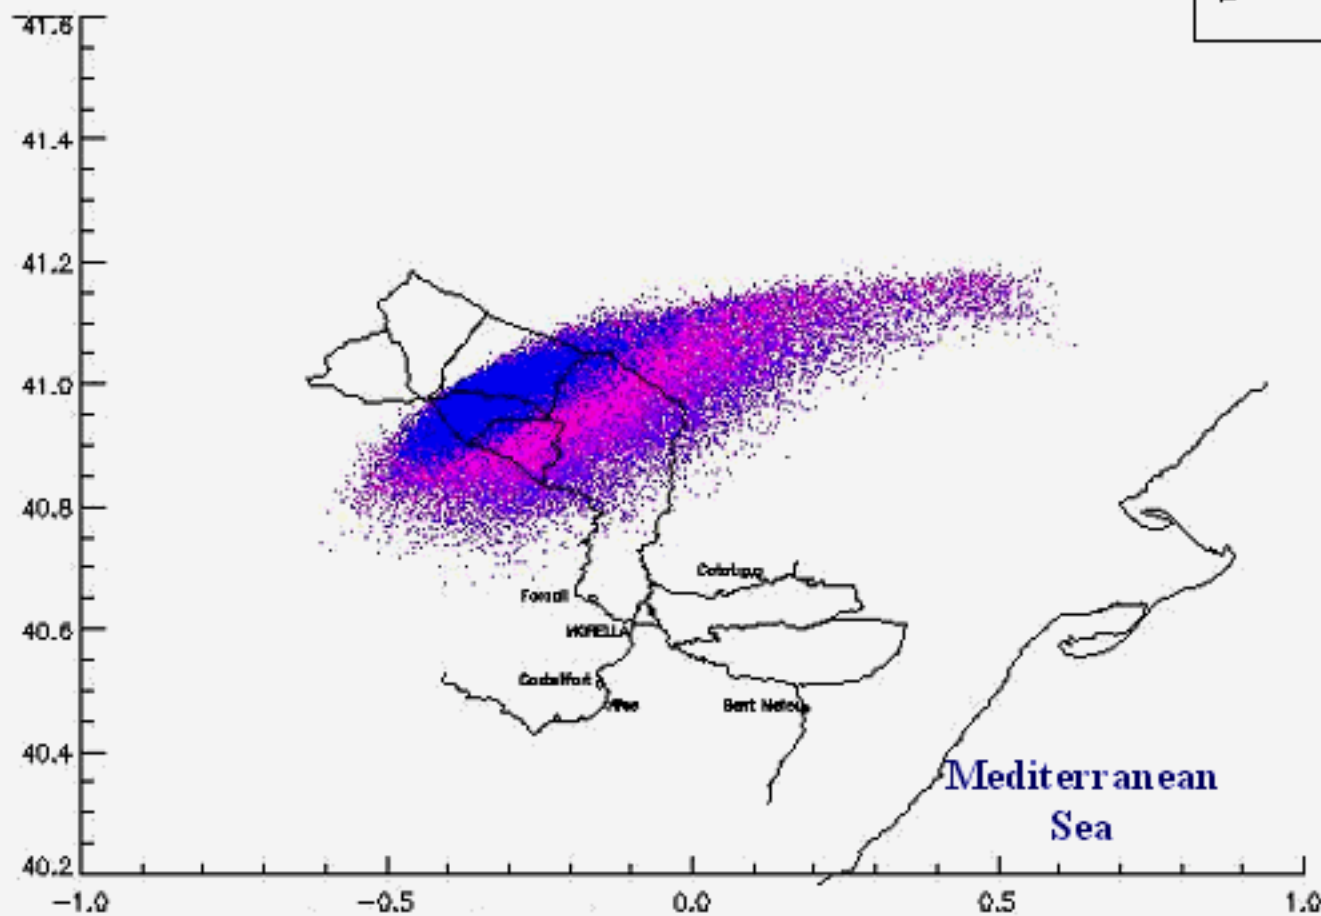

**SIMULTANEOUS MEASUREMENTS**

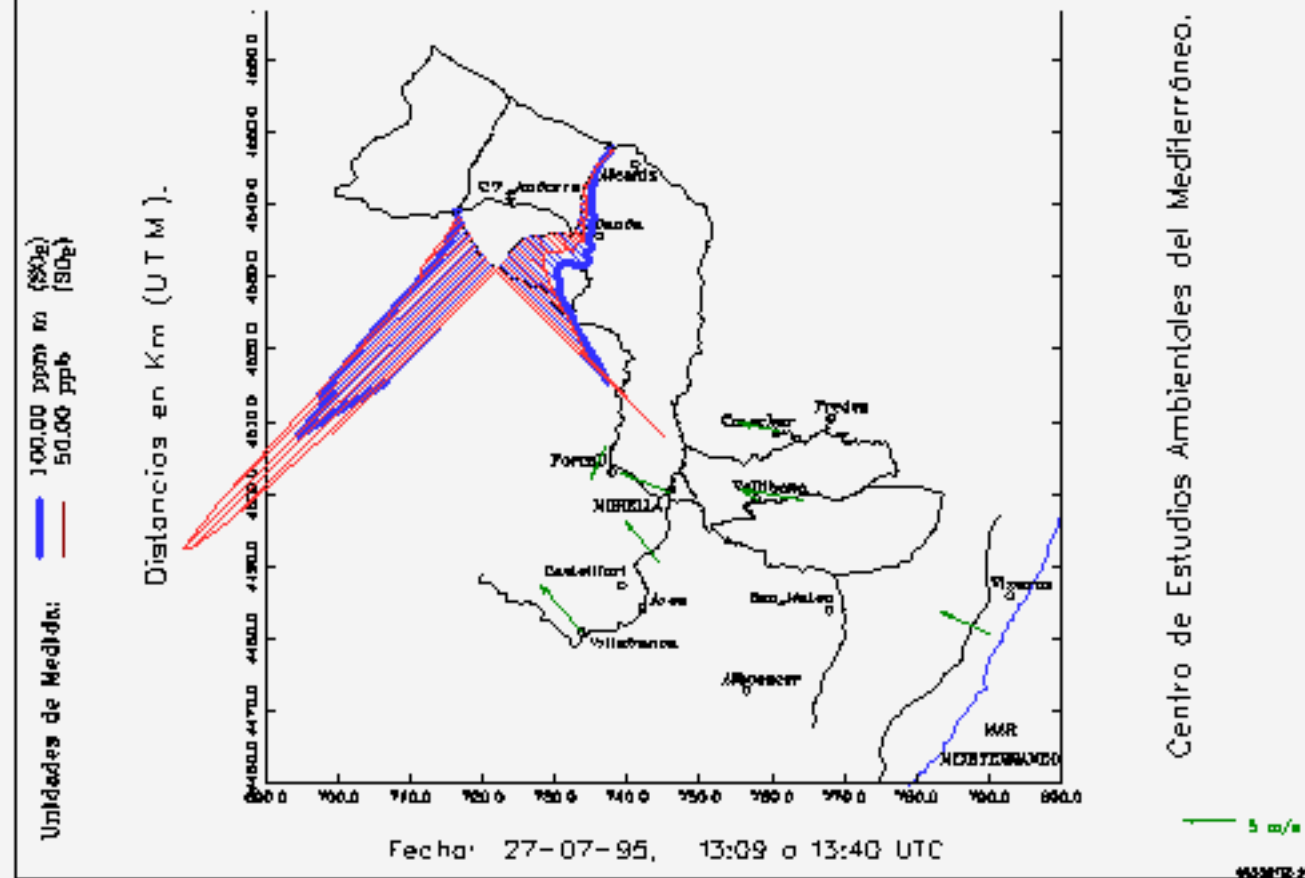

- **Concentration aloft**
- **Ground-level Concentration**
- ➔ **10 m.a.g.l. Wind Vector**

- **Particles between 0 and 2 h since emission**
- **Particles between 2 and 4 h since emission**
- **Particles between 4 and 6 h since emission**



# DAY 27/07/95

## 15:00 UTC

### LPDM SIMULTIONS

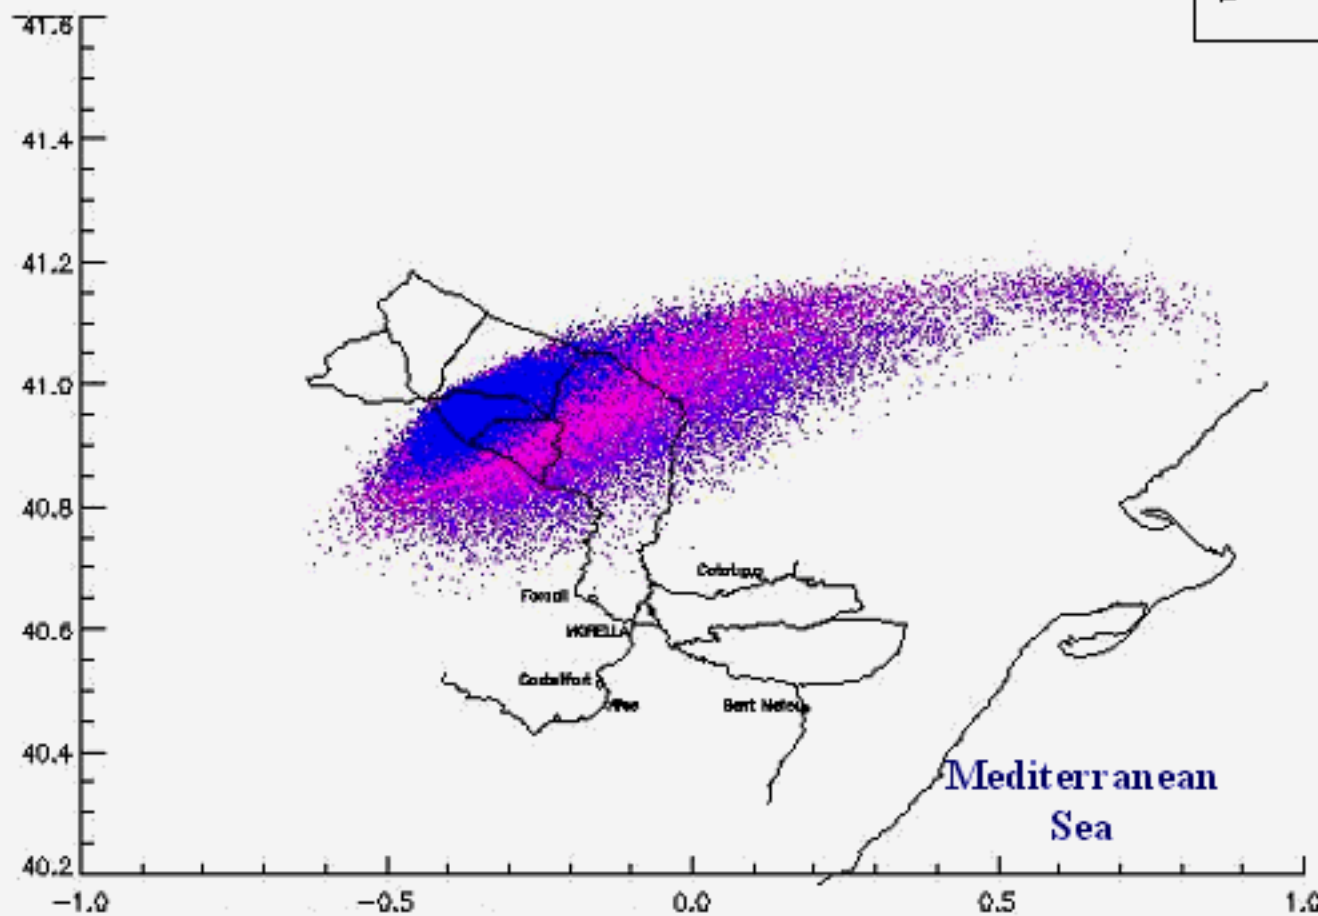

### SIMULTANEOUS MEASUREMENTS

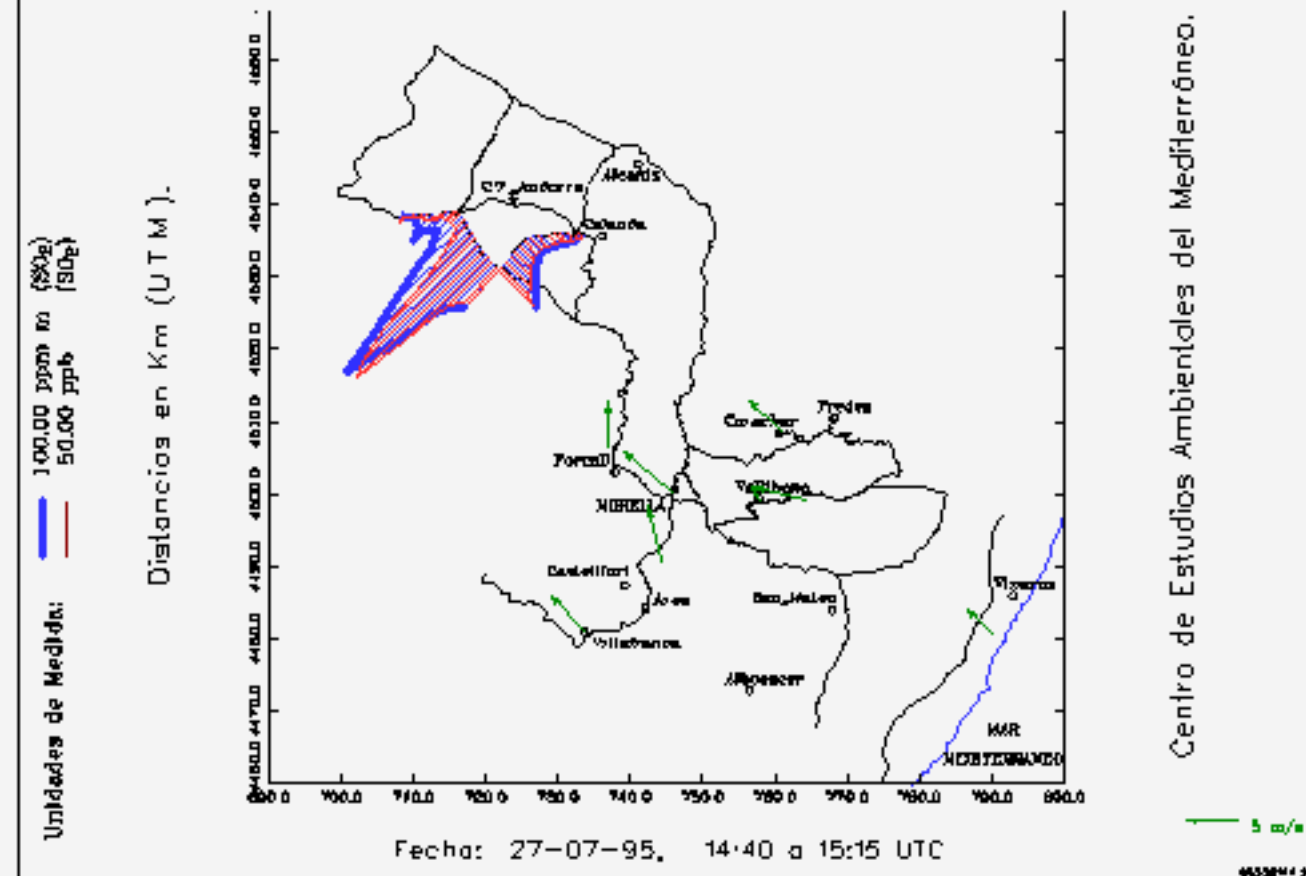

- Concentration aloft
- Ground-level Concentration
- ➔ 10 m.a.g.l. Wind Vector

- Particles between 0 and 2 h since emission
- Particles between 2 and 4 h since emission
- Particles between 4 and 6 h since emission

**DAY 27/07/95**

**16:00 UTC**

**LPDM SIMULTIONS**

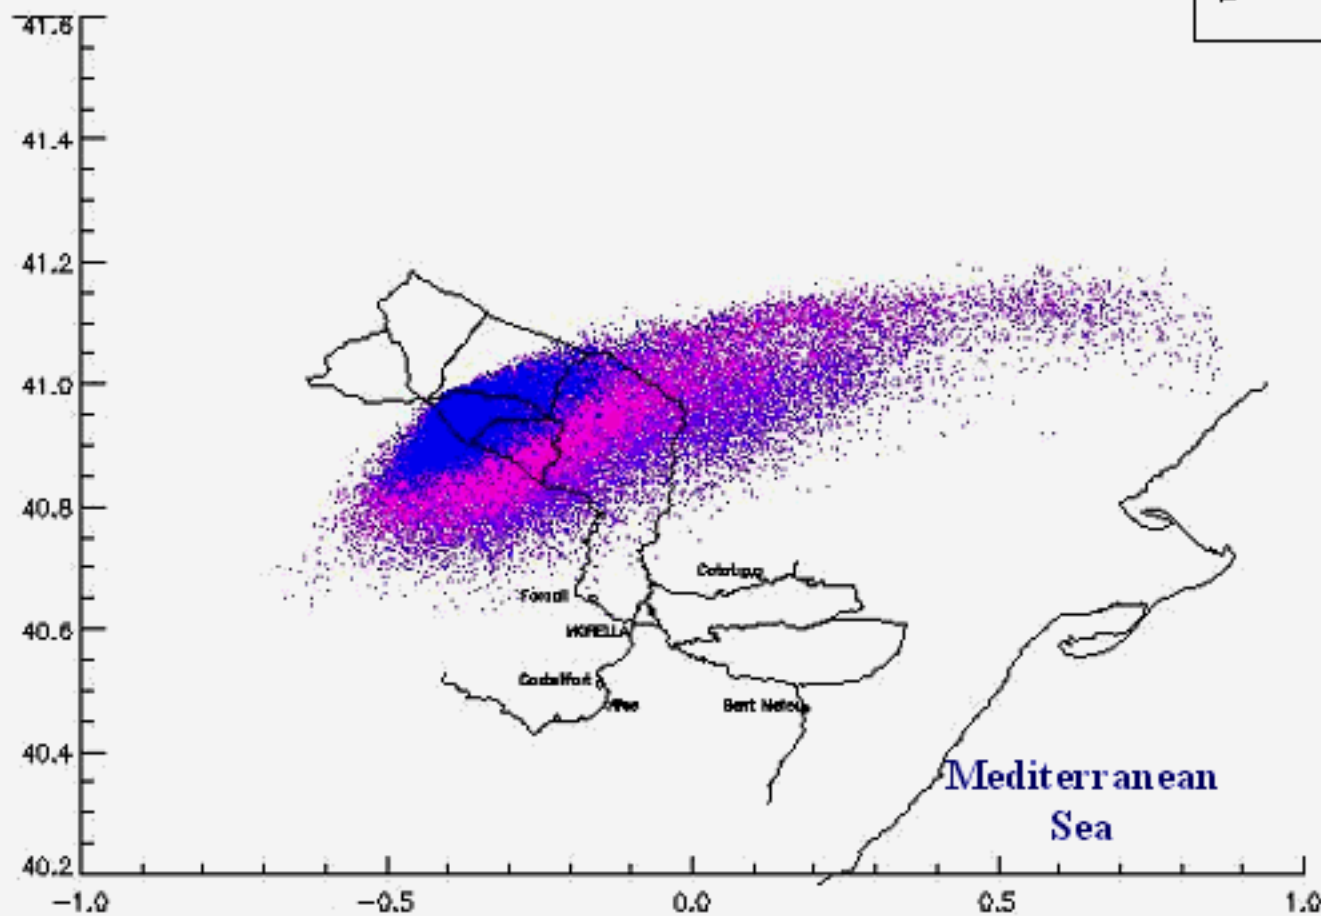

**SIMULTANEOUS MEASUREMENTS**

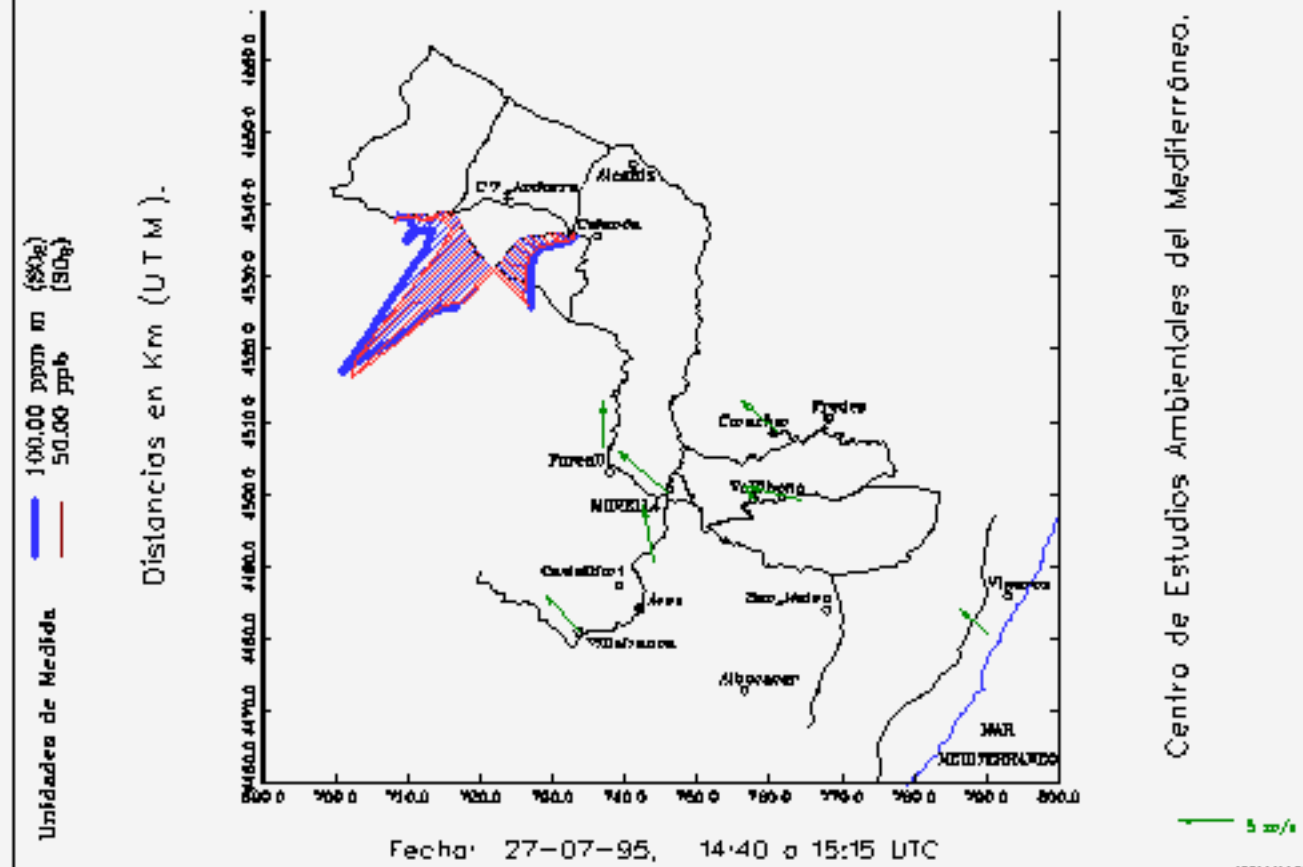

- Concentration aloft
- Ground-level Concentration
- ➔ 10 m.a.g.l. Wind Vector

- Particles between 0 and 2 h since emission
- Particles between 2 and 4 h since emission
- Particles between 4 and 6 h since emission

**DAY 27/07/95**

**17:00 UTC**

**LPDM SIMULTIONS**

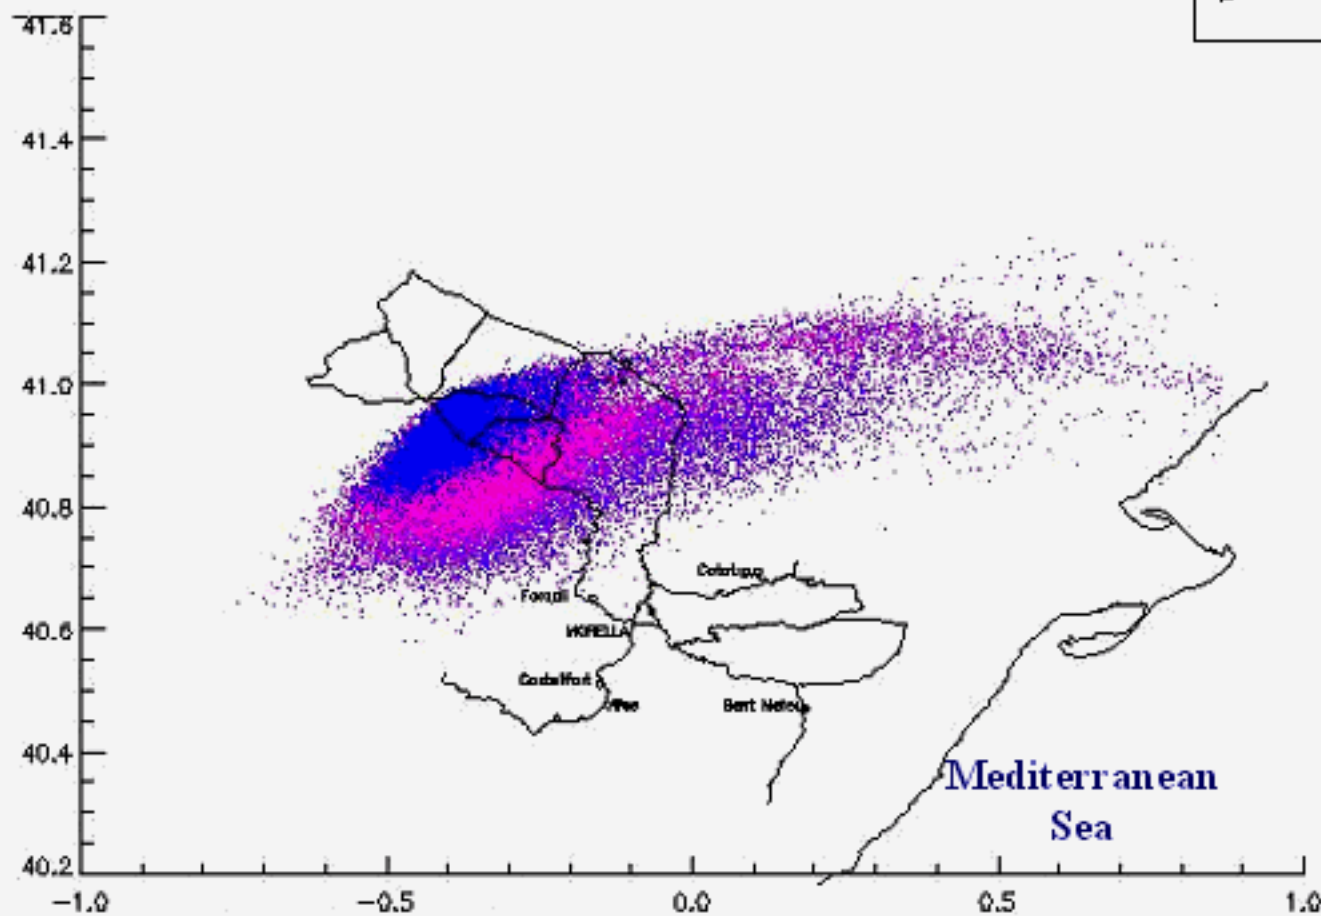

**SIMULTANEOUS MEASUREMENTS**

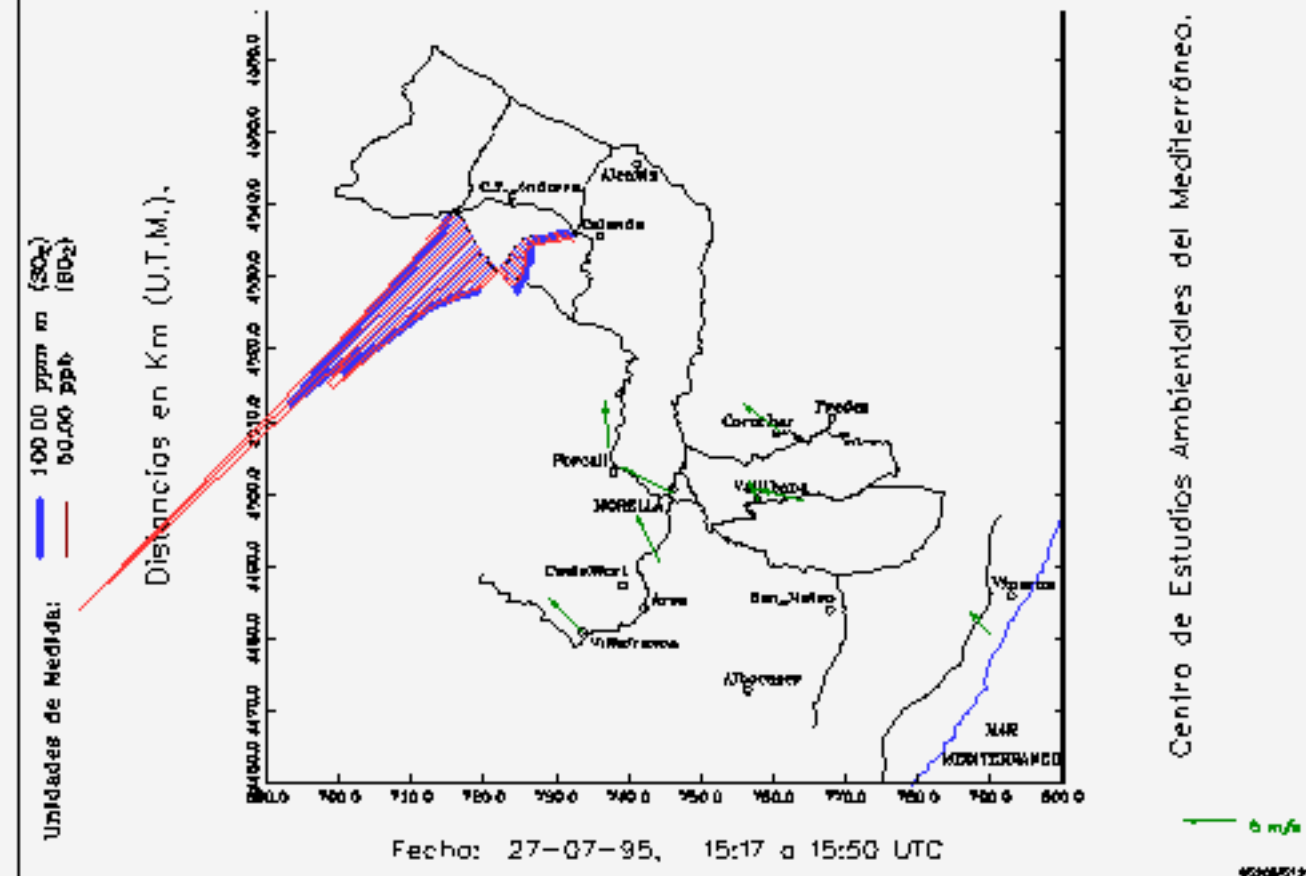

- Concentration aloft
- Ground-level Concentration
- ➔ 10 m.a.g.l. Wind Vector

- Particles between 0 and 2 h since emission
- Particles between 2 and 4 h since emission
- Particles between 4 and 6 h since emission

**DAY 27/07/95**

**18:00 UTC**

**LPDM SIMULTIONS**

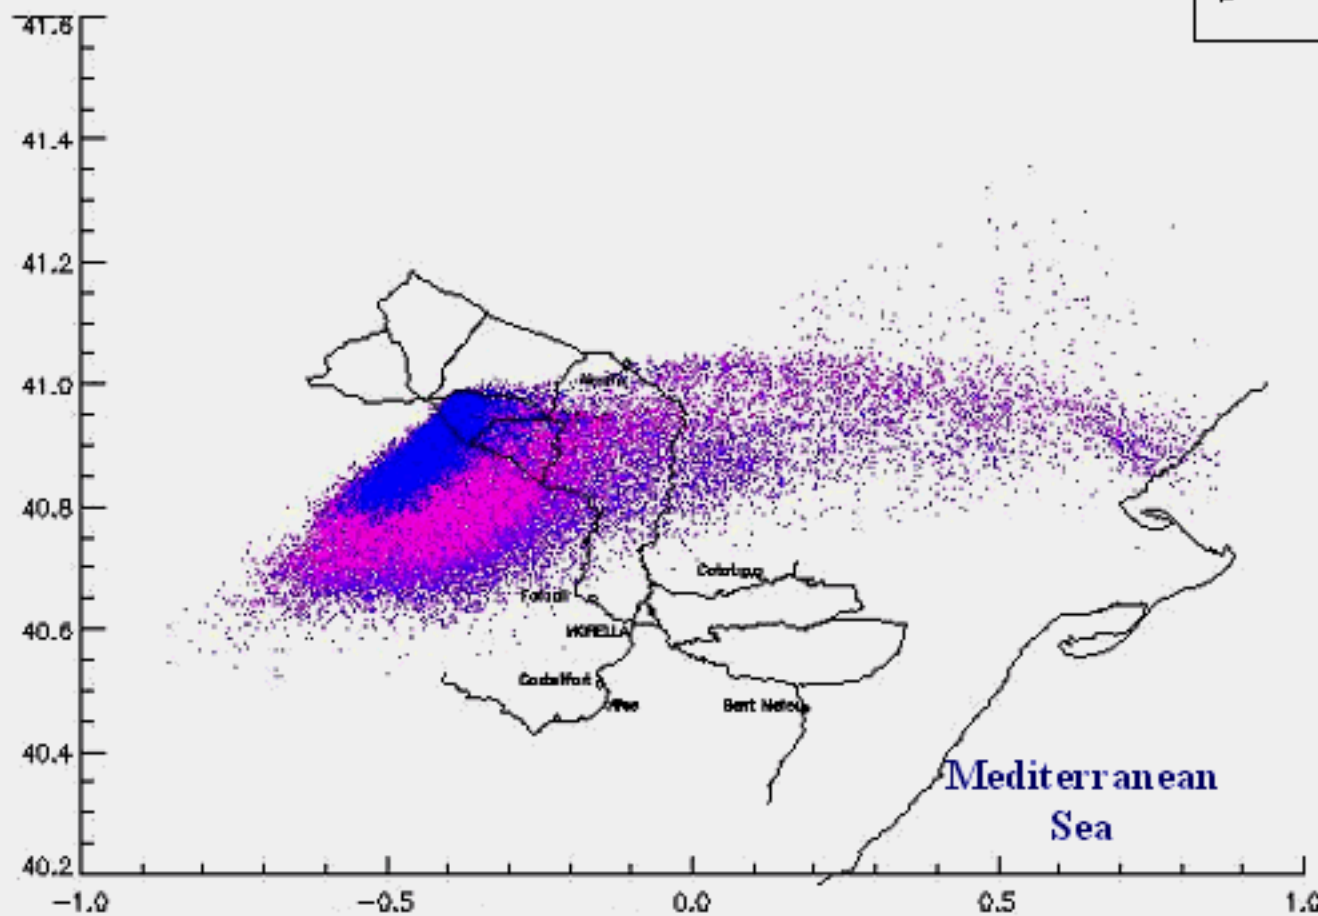

**SIMULTANEOUS MEASUREMENTS**

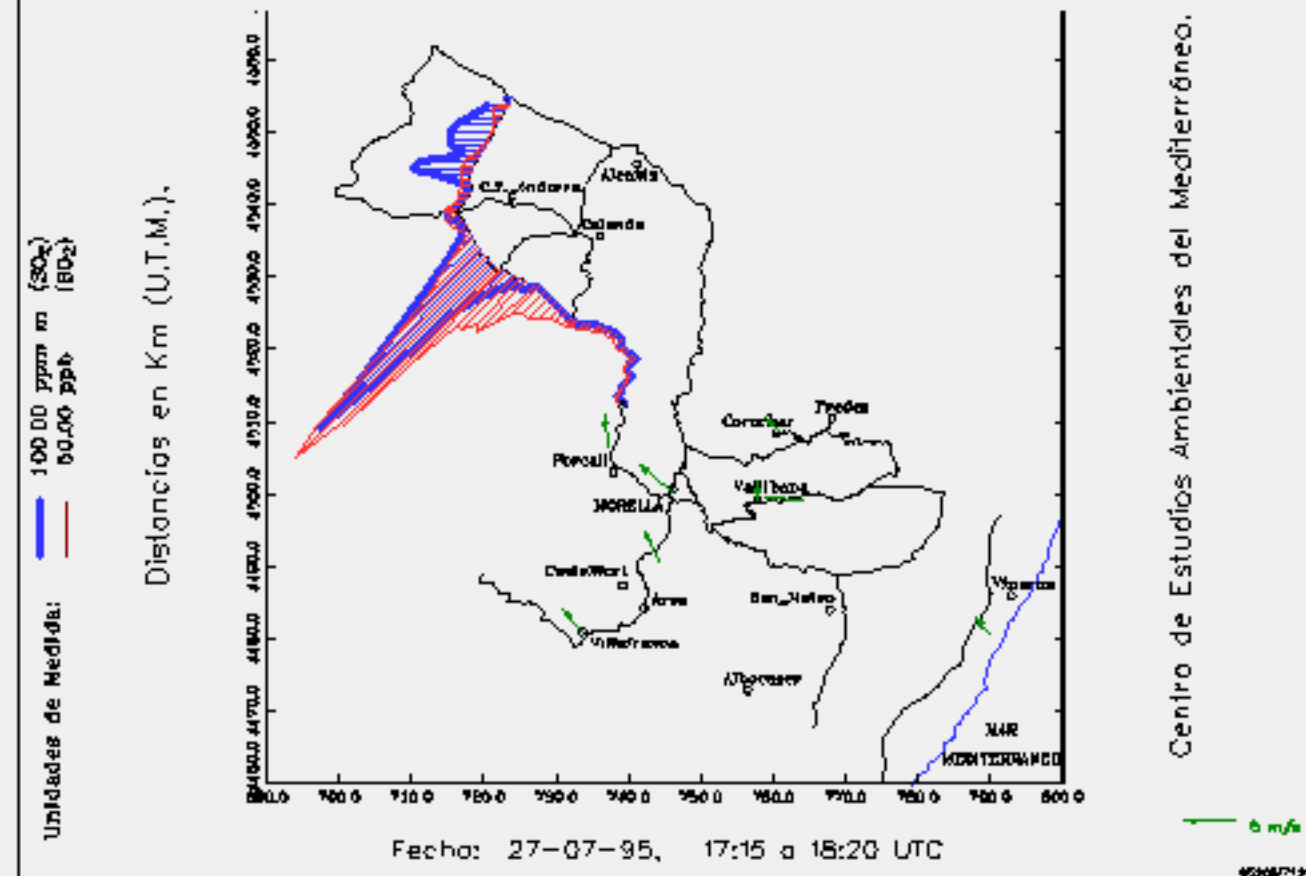

- **Concentration aloft**
- **Ground-level Concentration**
- ➔ **10 m.a.g.l. Wind Vector**

- **Particles between 0 and 2 h since emission**
- **Particles between 2 and 4 h since emission**
- **Particles between 4 and 6 h since emission**



**DAY 27/07/95**

**19:00 UTC**

LPDM SIMULTIONS

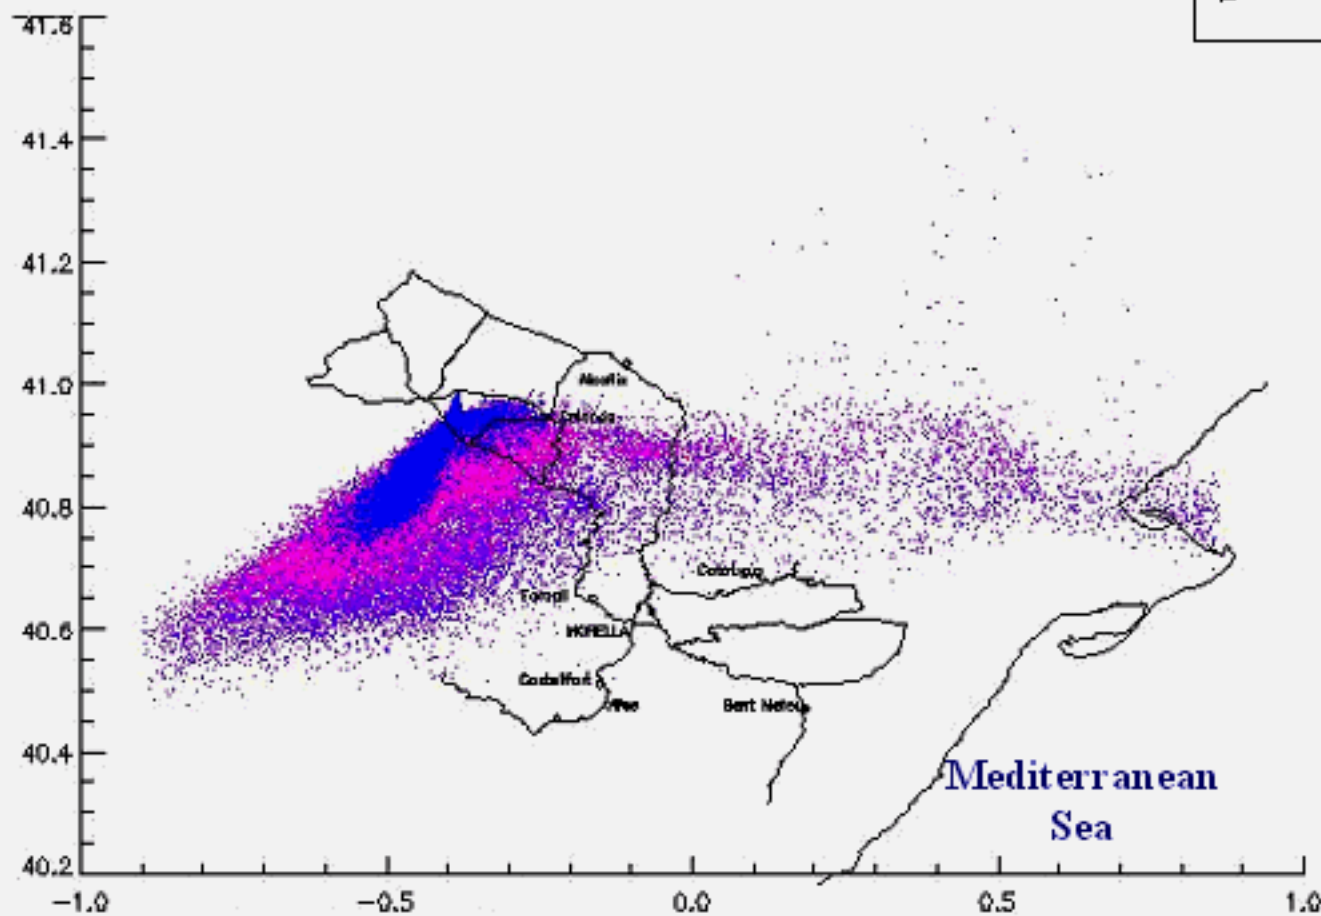

**SIMULTANEOUS MEASUREMENTS**

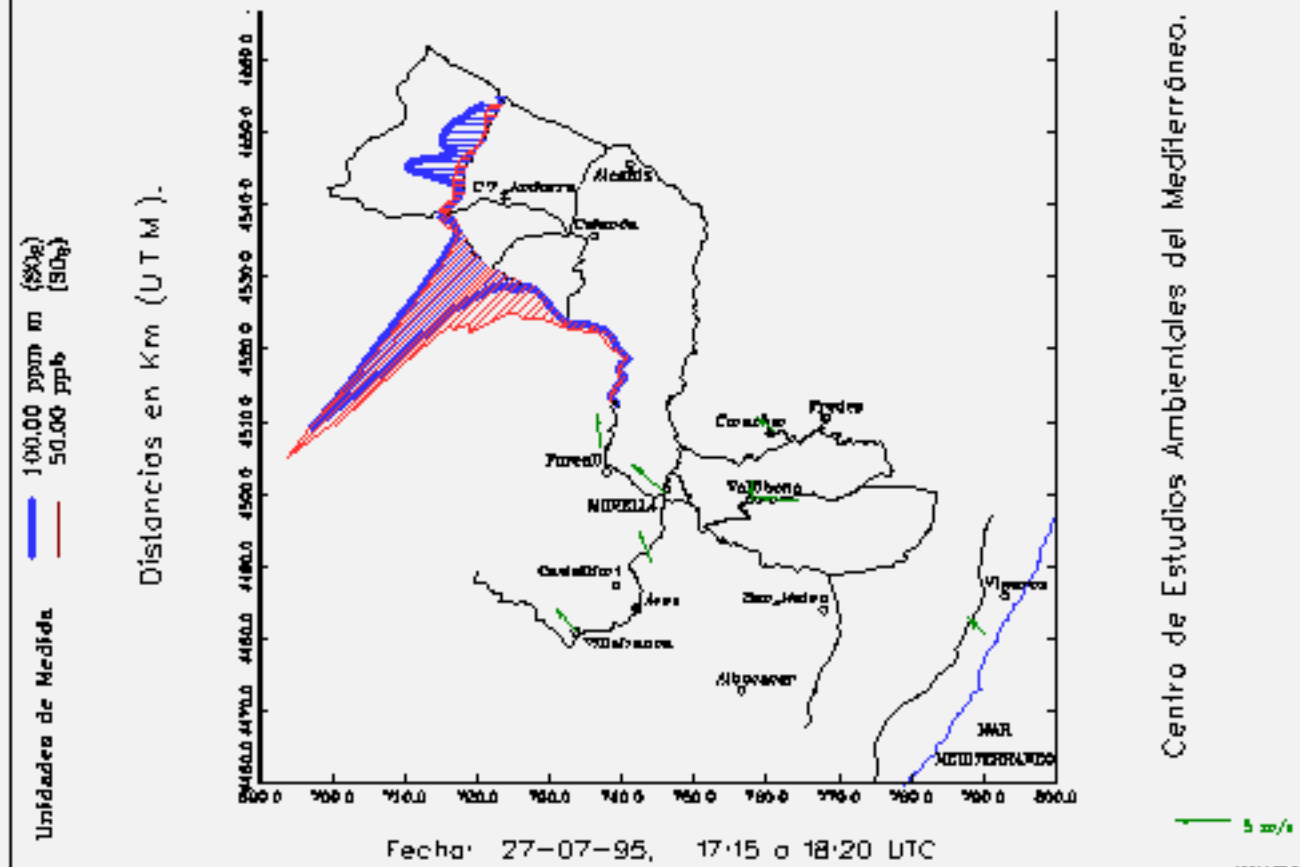

- **Concentration aloft**
- **Ground-level Concentration**
- ➔ **10 m.a.g.l. Wind Vector**

- **Particles between 0 and 2 h since emission**
- **Particles between 2 and 4 h since emission**
- **Particles between 4 and 6 h since emission**

**DAY 27/07/95**

**20:00 UTC**

LPDM SIMULTIONS

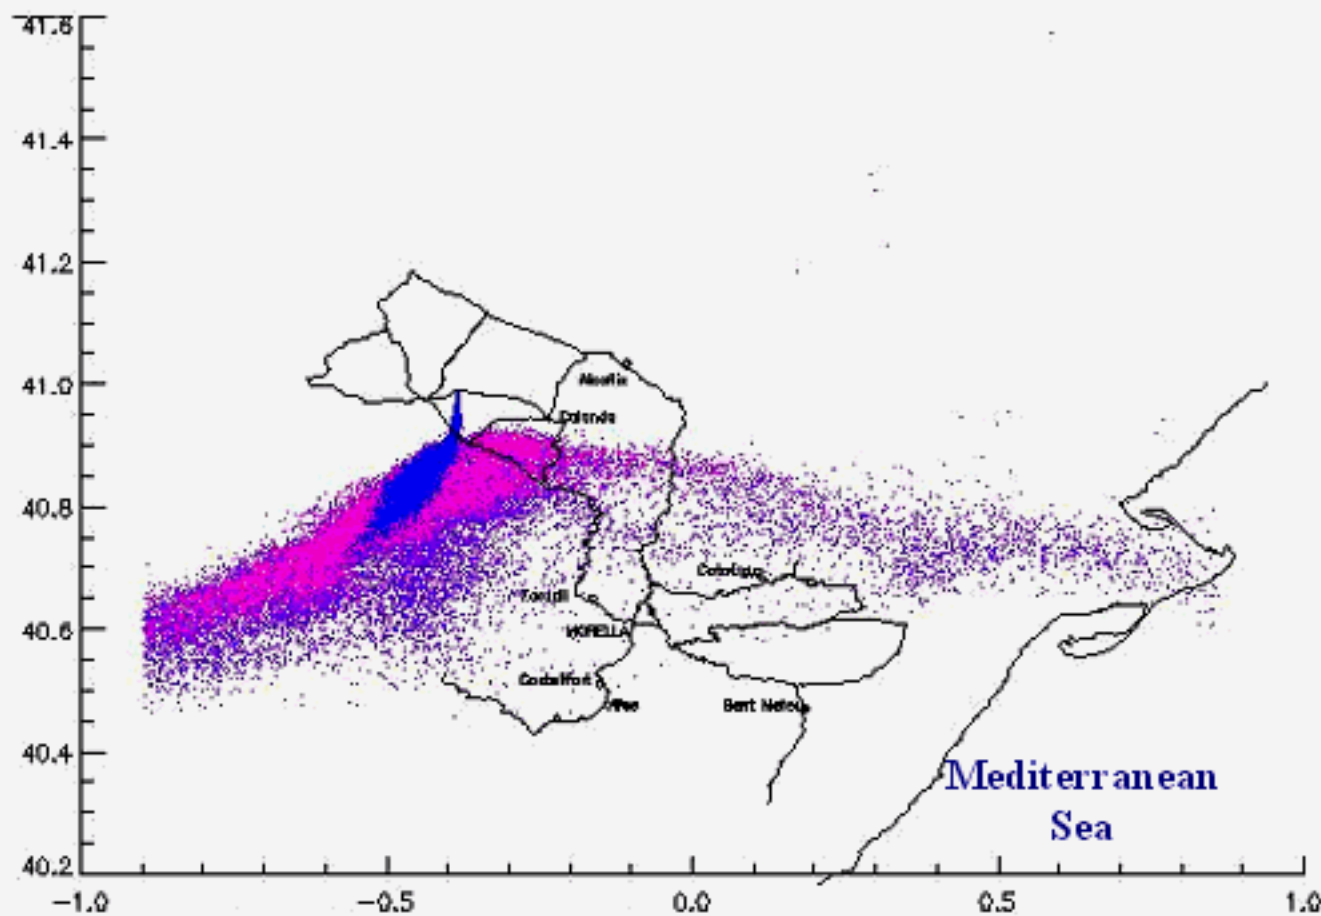

- Particles between 0 and 2 h since emission
- Particles between 2 and 4 h since emission
- Particles between 4 and 6 h since emission

**DAY 27/07/95**

**21:00 UTC**

LPDM SIMULTIONS

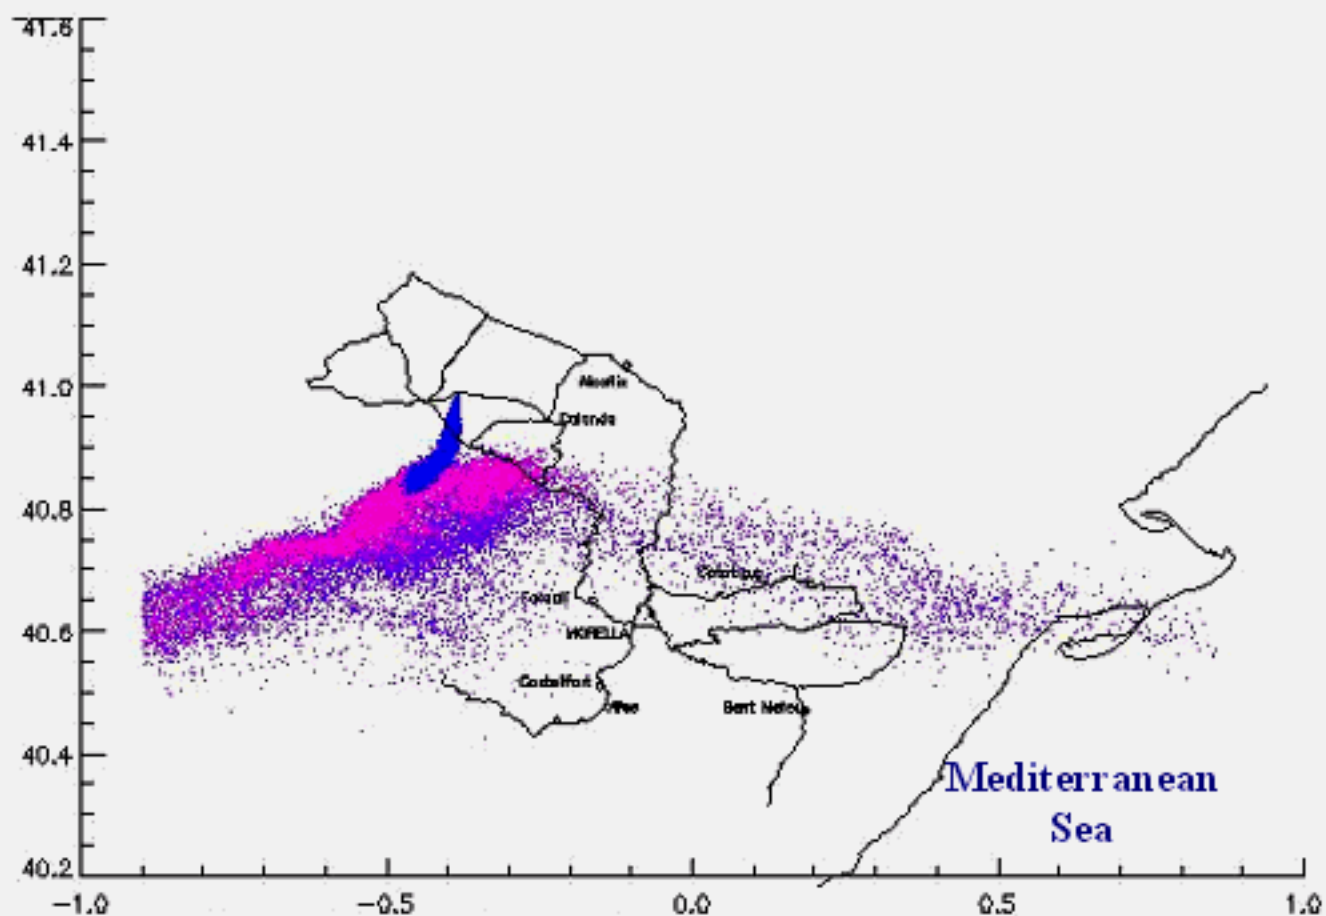

- Particles between 0 and 2 h since emission
- Particles between 2 and 4 h since emission
- Particles between 4 and 6 h since emission

**DAY 27/07/95**

**22:00 UTC**

LPDM SIMULTIONS

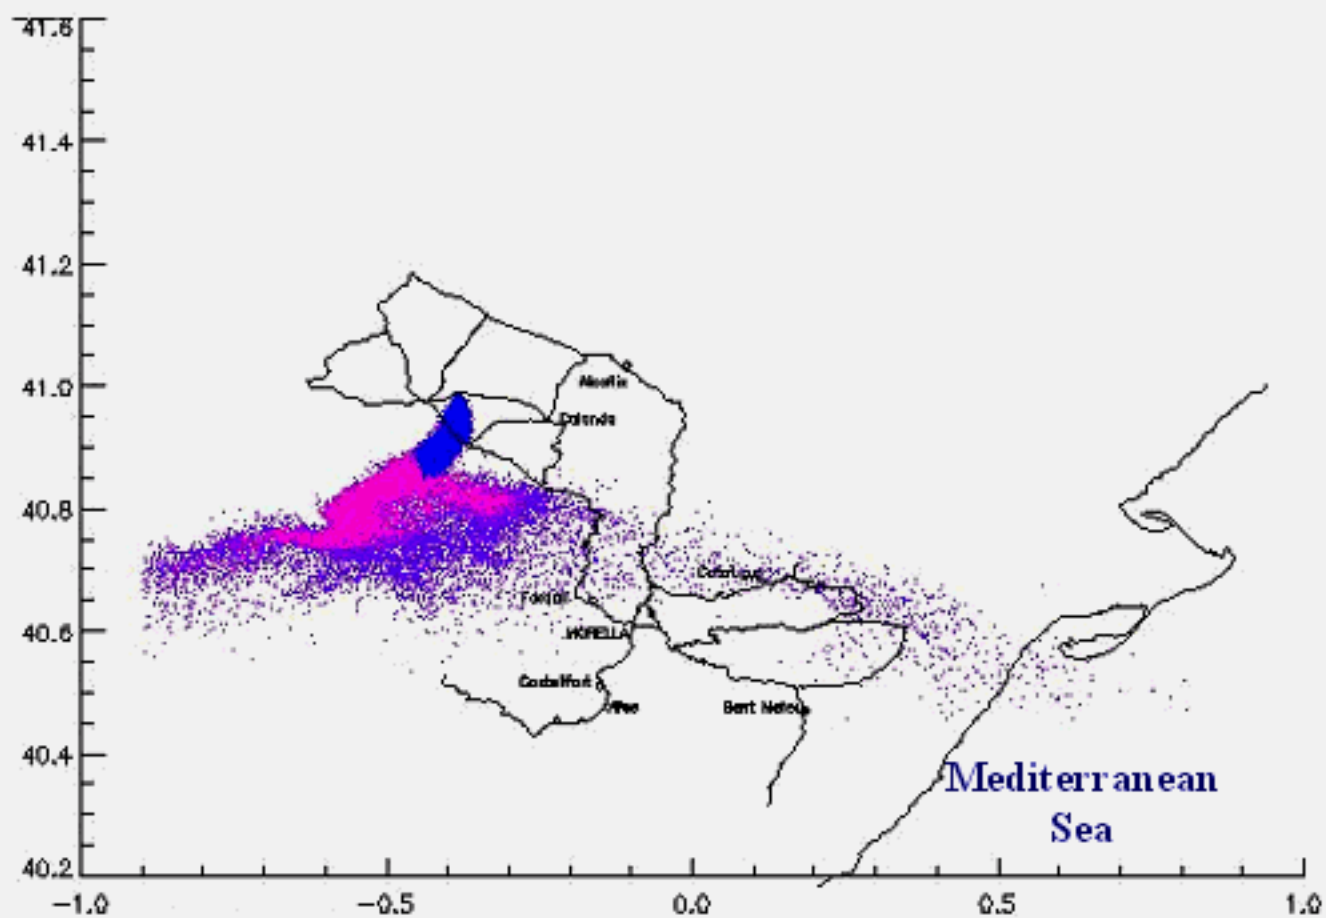

- Particles between 0 and 2 h since emission
- Particles between 2 and 4 h since emission
- Particles between 4 and 6 h since emission

**DAY 27/07/95**

**23:00 UTC**

LPDM SIMULTIONS

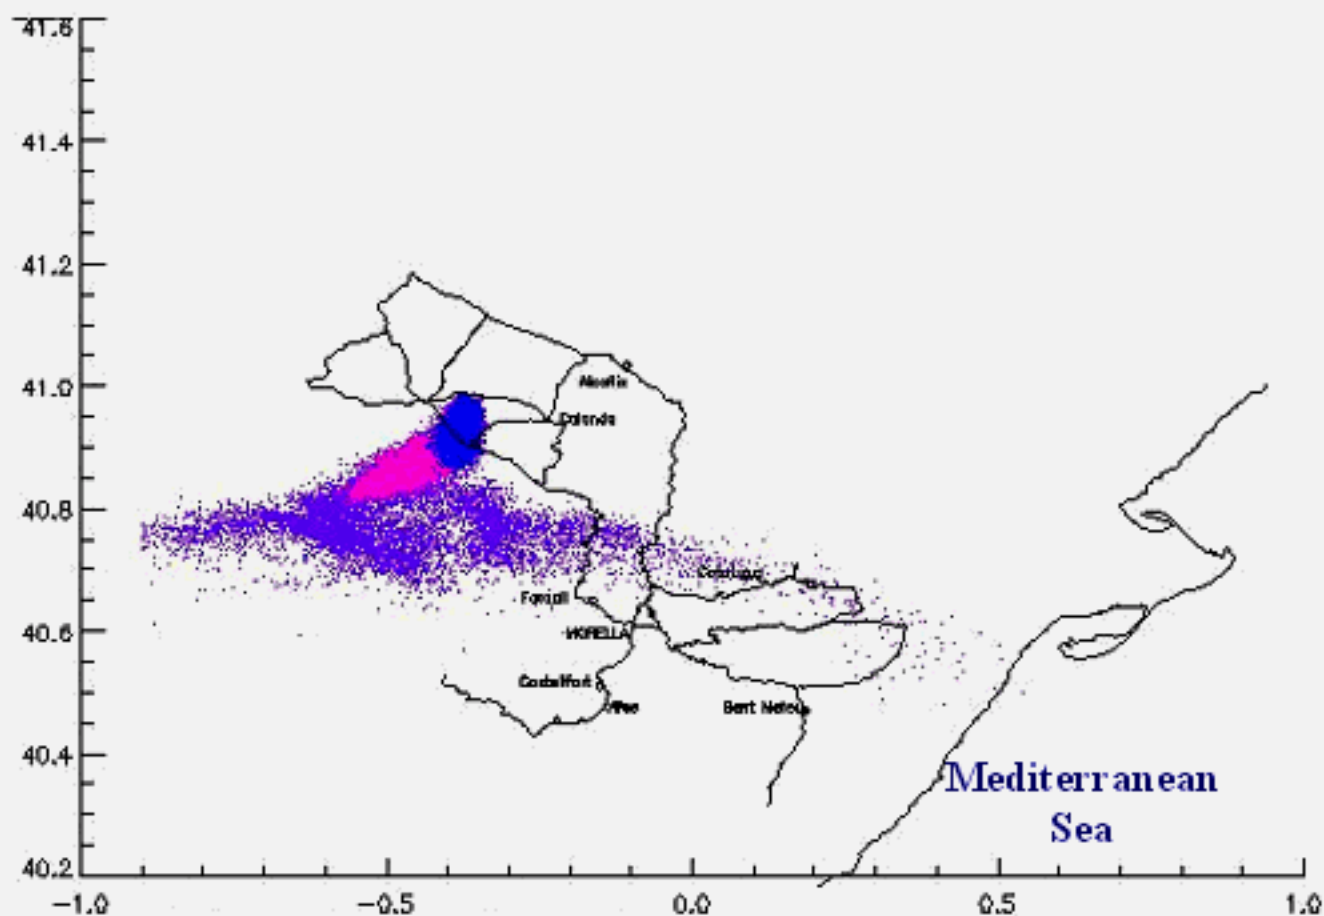

- Particles between 0 and 2 h since emission
- Particles between 2 and 4 h since emission
- Particles between 4 and 6 h since emission



**DAY 28/07/95**

**00:00 UTC**

LPDM SIMULTIONS

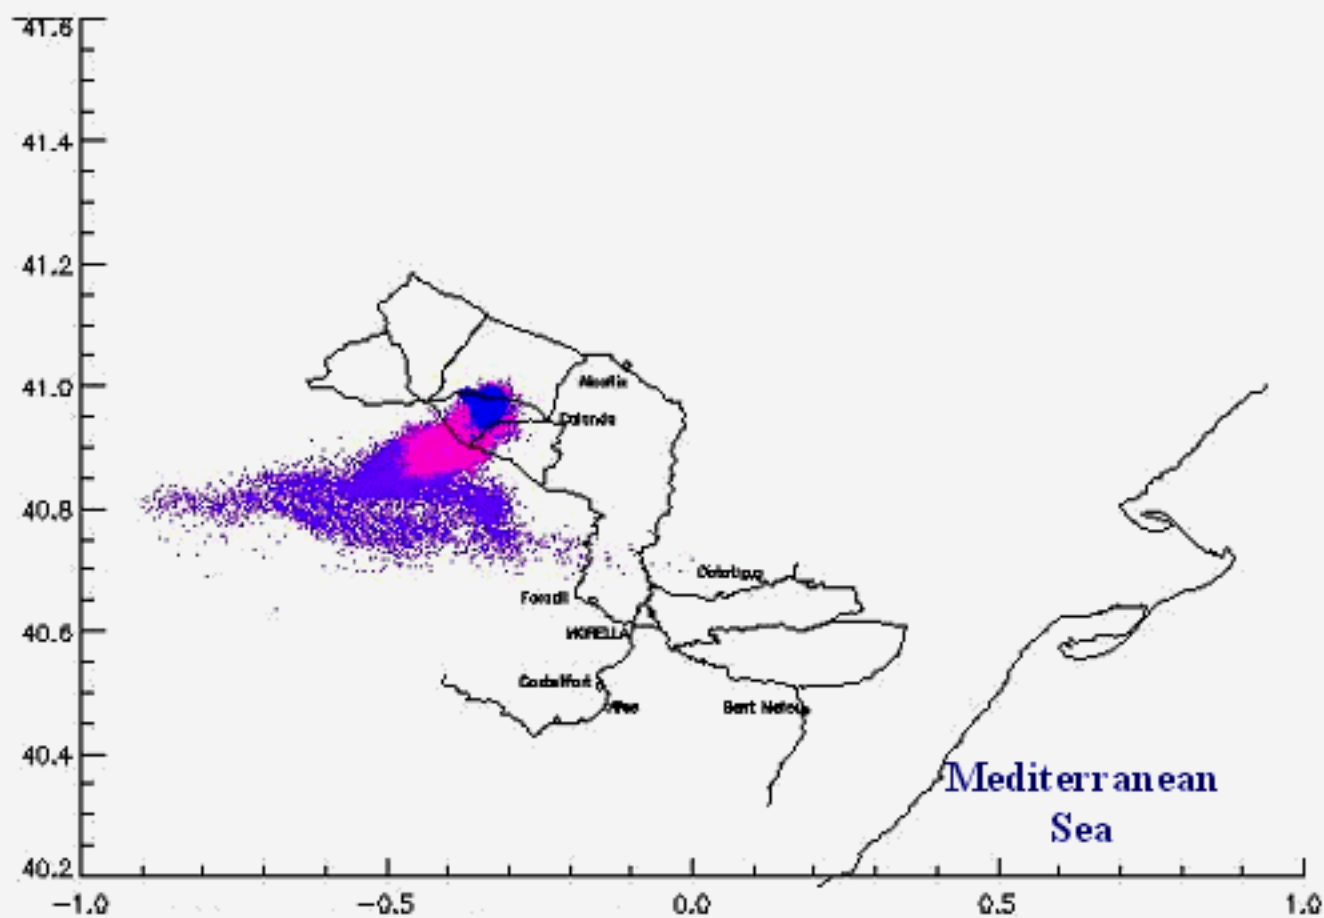

- Particles between 0 and 2 h since emission
- Particles between 2 and 4 h since emission
- Particles between 4 and 6 h since emission

**DAY 28/07/95**

**01:00 UTC**

LPDM SIMULTIONS

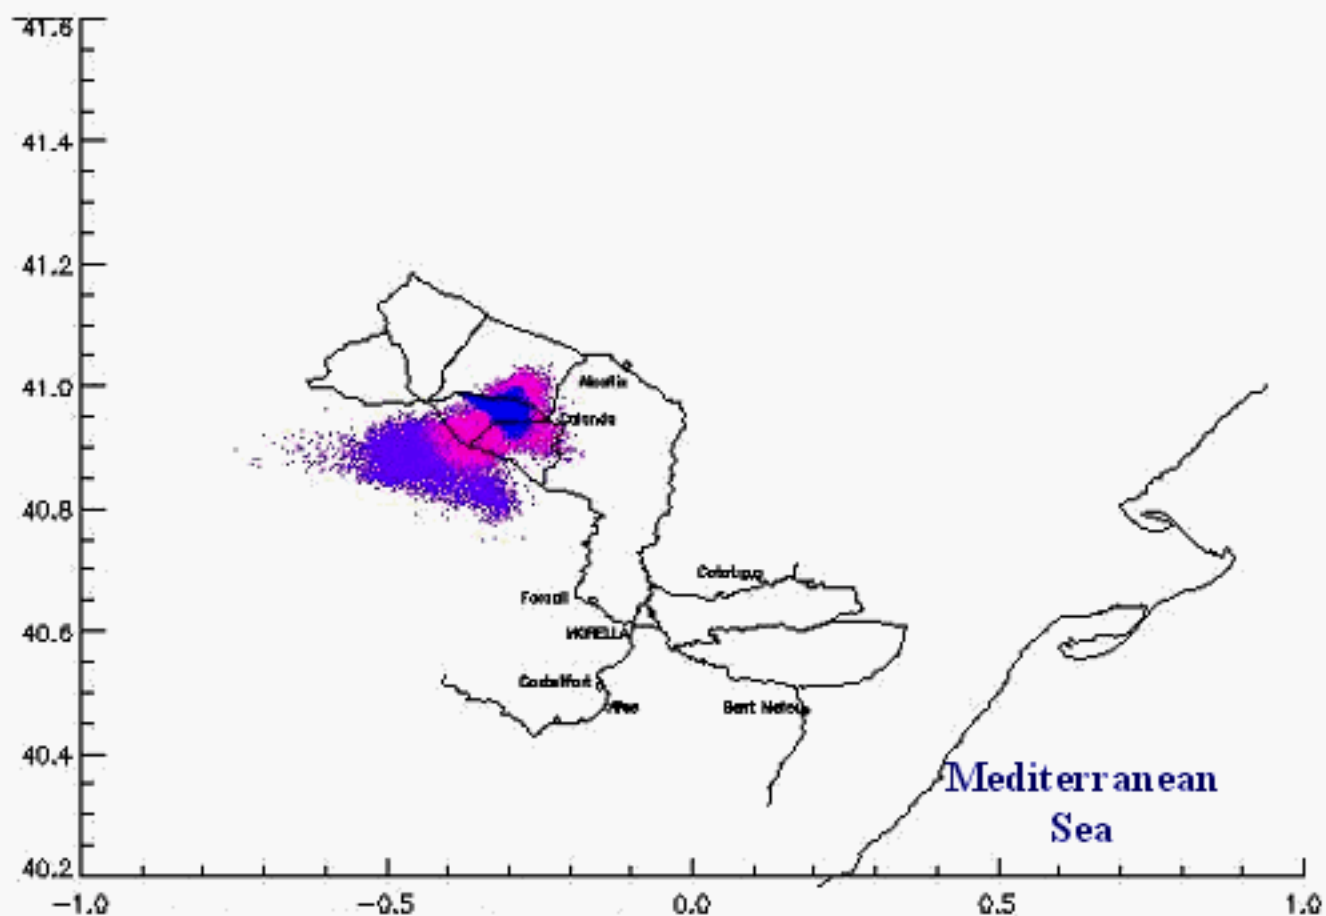

- Particles between 0 and 2 h since emission
- Particles between 2 and 4 h since emission
- Particles between 4 and 6 h since emission

**DAY 28/07/95**

**02:00 UTC**

LPDM SIMULTIONS

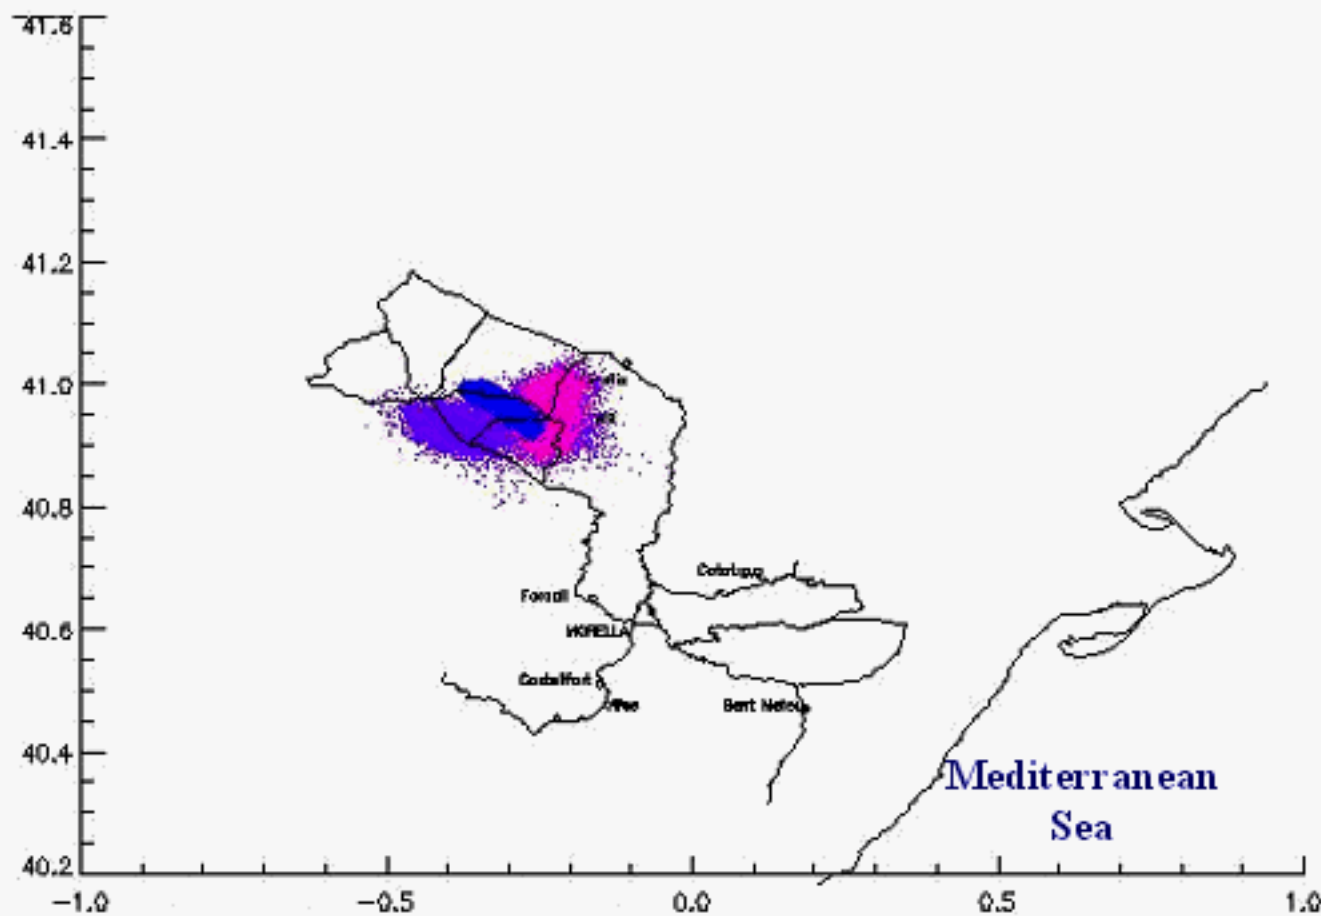

- Particles between 0 and 2 h since emission
- Particles between 2 and 4 h since emission
- Particles between 4 and 6 h since emission

**DAY 28/07/95**

**END**

LPDM SIMULTIONS

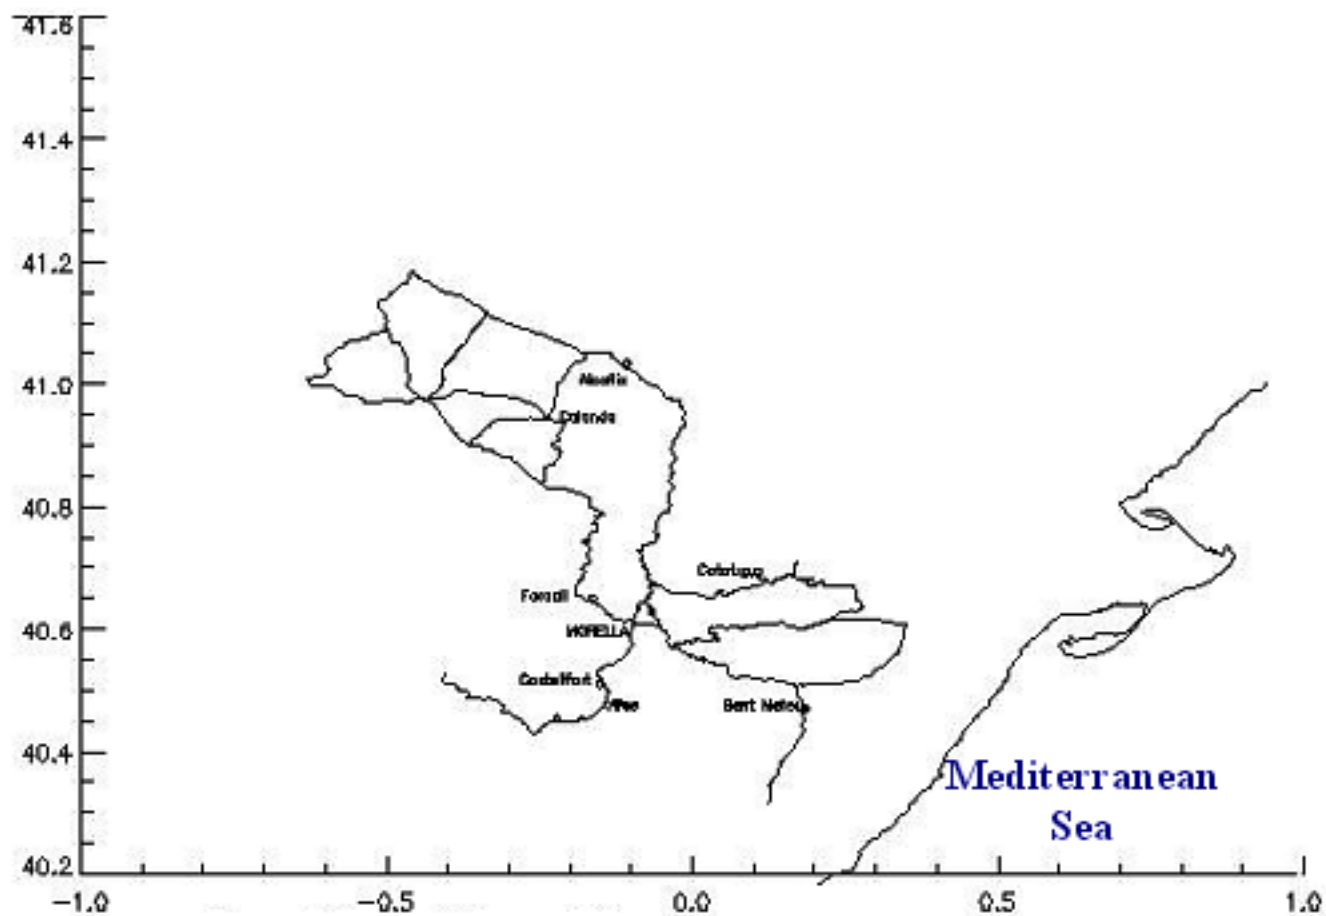

Supplement: Supplementary file 1 [file acp-9-119-2009-supplement.pdf]
